# Supplementary material for: Reduced miR-125a-5p level in non-small-cell lung cancer is associated with tumour progression
Source: PubMed Central journal article supplement (PMC6223209; doi:10.1098/rsob.180118), 2018-10-10
Supplement: rsob180118supp3.pdf [file rsob180118supp3.pdf]

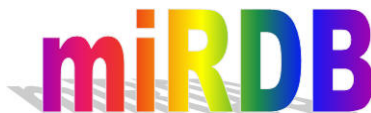

## There are 479 predicted targets for hsa-miR-125a-5p in miRDB.

| Target Detail           | Target Rank | Target Score | miRNA Name      | Gene Symbol               | Gene Description                                                                                                 |
|-------------------------|-------------|--------------|-----------------|---------------------------|------------------------------------------------------------------------------------------------------------------|
| <a href="#">Details</a> | 1           | 100          | hsa-miR-125a-5p | <a href="#">IRF4</a>      | interferon regulatory factor 4                                                                                   |
| <a href="#">Details</a> | 2           | 99           | hsa-miR-125a-5p | <a href="#">LACTB</a>     | lactamase, beta                                                                                                  |
| <a href="#">Details</a> | 3           | 99           | hsa-miR-125a-5p | <a href="#">OSBPL9</a>    | oxysterol binding protein-like 9                                                                                 |
| <a href="#">Details</a> | 4           | 99           | hsa-miR-125a-5p | <a href="#">ZSWIM6</a>    | zinc finger, SWIM-type containing 6                                                                              |
| <a href="#">Details</a> | 5           | 99           | hsa-miR-125a-5p | <a href="#">ENPEP</a>     | glutamyl aminopeptidase (aminopeptidase A)                                                                       |
| <a href="#">Details</a> | 6           | 98           | hsa-miR-125a-5p | <a href="#">HIF1AN</a>    | hypoxia inducible factor 1, alpha subunit inhibitor                                                              |
| <a href="#">Details</a> | 7           | 98           | hsa-miR-125a-5p | <a href="#">GCNT1</a>     | glucosaminyl (N-acetyl) transferase 1, core 2                                                                    |
| <a href="#">Details</a> | 8           | 97           | hsa-miR-125a-5p | <a href="#">SLC39A9</a>   | solute carrier family 39, member 9                                                                               |
| <a href="#">Details</a> | 9           | 97           | hsa-miR-125a-5p | <a href="#">SMEK1</a>     | SMEK homolog 1, suppressor of mek1 (Dictyostelium)                                                               |
| <a href="#">Details</a> | 10          | 97           | hsa-miR-125a-5p | <a href="#">SEMA4D</a>    | sema domain, immunoglobulin domain (Ig), transmembrane domain (TM) and short cytoplasmic domain, (semaphorin) 4D |
| <a href="#">Details</a> | 11          | 97           | hsa-miR-125a-5p | <a href="#">SLC35A4</a>   | solute carrier family 35, member A4                                                                              |
| <a href="#">Details</a> | 12          | 97           | hsa-miR-125a-5p | <a href="#">IER3IP1</a>   | immediate early response 3 interacting protein 1                                                                 |
| <a href="#">Details</a> | 13          | 97           | hsa-miR-125a-5p | <a href="#">STARD13</a>   | StAR-related lipid transfer (START) domain containing 13                                                         |
| <a href="#">Details</a> | 14          | 97           | hsa-miR-125a-5p | <a href="#">NPL</a>       | N-acetylneuraminic acid pyruvate lyase (dihydrodipicolinate synthase)                                            |
| <a href="#">Details</a> | 15          | 97           | hsa-miR-125a-5p | <a href="#">ABHD6</a>     | abhydrolase domain containing 6                                                                                  |
| <a href="#">Details</a> | 16          | 96           | hsa-miR-125a-5p | <a href="#">DRAM2</a>     | DNA-damage regulated autophagy modulator 2                                                                       |
| <a href="#">Details</a> | 17          | 96           | hsa-miR-125a-5p | <a href="#">KIAA1522</a>  | KIAA1522                                                                                                         |
| <a href="#">Details</a> | 18          | 96           | hsa-miR-125a-5p | <a href="#">C17orf103</a> | chromosome 17 open reading frame 103                                                                             |
| <a href="#">Details</a> | 19          | 96           | hsa-miR-125a-5p | <a href="#">KCNS3</a>     | potassium voltage-gated channel, delayed-rectifier, subfamily S, member 3                                        |
| <a href="#">Details</a> | 20          | 96           | hsa-miR-125a-5p | <a href="#">WARS</a>      | tryptophanyl-tRNA synthetase                                                                                     |
| <a href="#">Details</a> | 21          | 96           | hsa-miR-125a-5p | <a href="#">ZSWIM5</a>    | zinc finger, SWIM-type containing 5                                                                              |
| <a href="#">Details</a> | 22          | 96           | hsa-miR-125a-5p | <a href="#">RBM20</a>     | RNA binding motif protein 20                                                                                     |
| <a href="#">Details</a> | 23          | 96           | hsa-miR-125a-5p | <a href="#">RAPGEF5</a>   | Rap guanine nucleotide exchange factor (GEF) 5                                                                   |
| <a href="#">Details</a> | 24          | 95           | hsa-miR-125a-5p | <a href="#">TMEM161B</a>  | transmembrane protein 161B                                                                                       |
| <a href="#">Details</a> | 25          | 95           | hsa-miR-125a-5p | <a href="#">TRMT5</a>     | tRNA methyltransferase 5                                                                                         |
| <a href="#">Details</a> | 26          | 95           | hsa-miR-125a-5p | <a href="#">CGN</a>       | cingulin                                                                                                         |
| <a href="#">Details</a> | 27          | 95           | hsa-miR-125a-5p | <a href="#">ARID3B</a>    | AT rich interactive domain 3B (BRIGHT-like)                                                                      |
| <a href="#">Details</a> | 28          | 95           | hsa-miR-125a-5p | <a href="#">CCNJ</a>      | cyclin J                                                                                                         |
| <a href="#">Details</a> | 29          | 95           | hsa-miR-125a-5p | <a href="#">SGPL1</a>     | sphingosine-1-phosphate lyase 1                                                                                  |
| <a href="#">Details</a> | 30          | 95           | hsa-miR-125a-5p | <a href="#">TTC7A</a>     | tetratricopeptide repeat domain 7A                                                                               |
| <a href="#">Details</a> | 31          | 94           | hsa-miR-125a-5p | <a href="#">PHKA1</a>     | phosphorylase kinase, alpha 1 (muscle)                                                                           |
| <a href="#">Details</a> | 32          | 94           | hsa-miR-125a-5p | <a href="#">ANKRD33B</a>  | ankyrin repeat domain 33B                                                                                        |
| <a href="#">Details</a> | 33          | 94           | hsa-miR-125a-5p | <a href="#">BMF</a>       | Bcl2 modifying factor                                                                                            |

|                         |    |    |                 |                          |                                                                                                        |
|-------------------------|----|----|-----------------|--------------------------|--------------------------------------------------------------------------------------------------------|
| <a href="#">Details</a> | 34 | 94 | hsa-miR-125a-5p | <a href="#">VPS4B</a>    | vacuolar protein sorting 4 homolog B ( <i>S. cerevisiae</i> )                                          |
| <a href="#">Details</a> | 35 | 94 | hsa-miR-125a-5p | <a href="#">NECAB3</a>   | N-terminal EF-hand calcium binding protein 3                                                           |
| <a href="#">Details</a> | 36 | 93 | hsa-miR-125a-5p | <a href="#">PDE7A</a>    | phosphodiesterase 7A                                                                                   |
| <a href="#">Details</a> | 37 | 93 | hsa-miR-125a-5p | <a href="#">OLFML2A</a>  | olfactomedin-like 2A                                                                                   |
| <a href="#">Details</a> | 38 | 93 | hsa-miR-125a-5p | <a href="#">ESRRA</a>    | estrogen-related receptor alpha                                                                        |
| <a href="#">Details</a> | 39 | 93 | hsa-miR-125a-5p | <a href="#">KLF13</a>    | Kruppel-like factor 13                                                                                 |
| <a href="#">Details</a> | 40 | 93 | hsa-miR-125a-5p | <a href="#">TRIAP1</a>   | TP53 regulated inhibitor of apoptosis 1                                                                |
| <a href="#">Details</a> | 41 | 93 | hsa-miR-125a-5p | <a href="#">ZSCAN29</a>  | zinc finger and SCAN domain containing 29                                                              |
| <a href="#">Details</a> | 42 | 92 | hsa-miR-125a-5p | <a href="#">ZNF543</a>   | zinc finger protein 543                                                                                |
| <a href="#">Details</a> | 43 | 92 | hsa-miR-125a-5p | <a href="#">PPIL2</a>    | peptidylprolyl isomerase (cyclophilin)-like 2                                                          |
| <a href="#">Details</a> | 44 | 92 | hsa-miR-125a-5p | <a href="#">PTPN18</a>   | protein tyrosine phosphatase, non-receptor type 18 (brain-derived)                                     |
| <a href="#">Details</a> | 45 | 92 | hsa-miR-125a-5p | <a href="#">ANAPC16</a>  | anaphase promoting complex subunit 16                                                                  |
| <a href="#">Details</a> | 46 | 92 | hsa-miR-125a-5p | <a href="#">FRMD5</a>    | FERM domain containing 5                                                                               |
| <a href="#">Details</a> | 47 | 92 | hsa-miR-125a-5p | <a href="#">VPS37C</a>   | vacuolar protein sorting 37 homolog C ( <i>S. cerevisiae</i> )                                         |
| <a href="#">Details</a> | 48 | 92 | hsa-miR-125a-5p | <a href="#">KCNK10</a>   | potassium channel, subfamily K, member 10                                                              |
| <a href="#">Details</a> | 49 | 92 | hsa-miR-125a-5p | <a href="#">RAB3D</a>    | RAB3D, member RAS oncogene family                                                                      |
| <a href="#">Details</a> | 50 | 92 | hsa-miR-125a-5p | <a href="#">USP45</a>    | ubiquitin specific peptidase 45                                                                        |
| <a href="#">Details</a> | 51 | 91 | hsa-miR-125a-5p | <a href="#">PAFAH1B1</a> | platelet-activating factor acetylhydrolase 1b, regulatory subunit 1 (45kDa)                            |
| <a href="#">Details</a> | 52 | 91 | hsa-miR-125a-5p | <a href="#">GALNT14</a>  | polypeptide N-acetylgalactosaminyltransferase 14                                                       |
| <a href="#">Details</a> | 53 | 90 | hsa-miR-125a-5p | <a href="#">NIPAL4</a>   | NIPA-like domain containing 4                                                                          |
| <a href="#">Details</a> | 54 | 90 | hsa-miR-125a-5p | <a href="#">PCTP</a>     | phosphatidylcholine transfer protein                                                                   |
| <a href="#">Details</a> | 55 | 90 | hsa-miR-125a-5p | <a href="#">MTF1</a>     | metal-regulatory transcription factor 1                                                                |
| <a href="#">Details</a> | 56 | 90 | hsa-miR-125a-5p | <a href="#">SLC38A9</a>  | solute carrier family 38, member 9                                                                     |
| <a href="#">Details</a> | 57 | 90 | hsa-miR-125a-5p | <a href="#">BCAT1</a>    | branched chain amino-acid transaminase 1, cytosolic                                                    |
| <a href="#">Details</a> | 58 | 90 | hsa-miR-125a-5p | <a href="#">ACER2</a>    | alkaline ceramidase 2                                                                                  |
| <a href="#">Details</a> | 59 | 89 | hsa-miR-125a-5p | <a href="#">RBM7</a>     | RNA binding motif protein 7                                                                            |
| <a href="#">Details</a> | 60 | 89 | hsa-miR-125a-5p | <a href="#">EIF4EBP1</a> | eukaryotic translation initiation factor 4E binding protein 1                                          |
| <a href="#">Details</a> | 61 | 89 | hsa-miR-125a-5p | <a href="#">TTPA</a>     | tocopherol (alpha) transfer protein                                                                    |
| <a href="#">Details</a> | 62 | 89 | hsa-miR-125a-5p | <a href="#">THEMIS2</a>  | thymocyte selection associated family member 2                                                         |
| <a href="#">Details</a> | 63 | 89 | hsa-miR-125a-5p | <a href="#">FREM1</a>    | FRAS1 related extracellular matrix 1                                                                   |
| <a href="#">Details</a> | 64 | 89 | hsa-miR-125a-5p | <a href="#">TSEN54</a>   | TSEN54 tRNA splicing endonuclease subunit                                                              |
| <a href="#">Details</a> | 65 | 89 | hsa-miR-125a-5p | <a href="#">RABL6</a>    | RAB, member RAS oncogene family-like 6                                                                 |
| <a href="#">Details</a> | 66 | 89 | hsa-miR-125a-5p | <a href="#">WDR5</a>     | WD repeat domain 5                                                                                     |
| <a href="#">Details</a> | 67 | 89 | hsa-miR-125a-5p | <a href="#">ANKRD44</a>  | ankyrin repeat domain 44                                                                               |
| <a href="#">Details</a> | 68 | 89 | hsa-miR-125a-5p | <a href="#">MLLT6</a>    | myeloid/lymphoid or mixed-lineage leukemia (trithorax homolog, <i>Drosophila</i> ); translocated to, 6 |
| <a href="#">Details</a> | 69 | 89 | hsa-miR-125a-5p | <a href="#">SARM1</a>    | sterile alpha and TIR motif containing 1                                                               |
| <a href="#">Details</a> | 70 | 89 | hsa-miR-125a-5p | <a href="#">SMURF1</a>   | SMAD specific E3 ubiquitin protein ligase 1                                                            |
| <a href="#">Details</a> | 71 | 89 | hsa-miR-125a-5p | <a href="#">ZFYVE1</a>   | zinc finger, FYVE domain containing 1                                                                  |
| <a href="#">Details</a> | 72 | 89 | hsa-miR-125a-5p | <a href="#">BAP1</a>     | BRCA1 associated protein-1 (ubiquitin carboxy-terminal hydrolase)                                      |
| <a href="#">Details</a> | 73 | 89 | hsa-miR-125a-5p | <a href="#">VTCN1</a>    | V-set domain containing T cell activation inhibitor 1                                                  |

|                         |     |    |                 |                          |                                                                                                                  |
|-------------------------|-----|----|-----------------|--------------------------|------------------------------------------------------------------------------------------------------------------|
| <a href="#">Details</a> | 74  | 88 | hsa-miR-125a-5p | <a href="#">ETV6</a>     | ets variant 6                                                                                                    |
| <a href="#">Details</a> | 75  | 88 | hsa-miR-125a-5p | <a href="#">SEMA4F</a>   | sema domain, immunoglobulin domain (Ig), transmembrane domain (TM) and short cytoplasmic domain, (semaphorin) 4F |
| <a href="#">Details</a> | 76  | 88 | hsa-miR-125a-5p | <a href="#">TLE3</a>     | transducin-like enhancer of split 3                                                                              |
| <a href="#">Details</a> | 77  | 88 | hsa-miR-125a-5p | <a href="#">C17orf59</a> | chromosome 17 open reading frame 59                                                                              |
| <a href="#">Details</a> | 78  | 88 | hsa-miR-125a-5p | <a href="#">UBN1</a>     | ubinuclain 1                                                                                                     |
| <a href="#">Details</a> | 79  | 87 | hsa-miR-125a-5p | <a href="#">MFN1</a>     | mitofusin 1                                                                                                      |
| <a href="#">Details</a> | 80  | 87 | hsa-miR-125a-5p | <a href="#">TSTD2</a>    | thiosulfate sulfurtransferase (rhodanese)-like domain containing 2                                               |
| <a href="#">Details</a> | 81  | 87 | hsa-miR-125a-5p | <a href="#">CBX7</a>     | chromobox homolog 7                                                                                              |
| <a href="#">Details</a> | 82  | 87 | hsa-miR-125a-5p | <a href="#">ELOVL6</a>   | ELOVL fatty acid elongase 6                                                                                      |
| <a href="#">Details</a> | 83  | 87 | hsa-miR-125a-5p | <a href="#">TAZ</a>      | tafazzin                                                                                                         |
| <a href="#">Details</a> | 84  | 87 | hsa-miR-125a-5p | <a href="#">IER2</a>     | immediate early response 2                                                                                       |
| <a href="#">Details</a> | 85  | 87 | hsa-miR-125a-5p | <a href="#">IL6R</a>     | interleukin 6 receptor                                                                                           |
| <a href="#">Details</a> | 86  | 87 | hsa-miR-125a-5p | <a href="#">RFXANK</a>   | regulatory factor X-associated ankyrin-containing protein                                                        |
| <a href="#">Details</a> | 87  | 87 | hsa-miR-125a-5p | <a href="#">ABHD3</a>    | abhydrolase domain containing 3                                                                                  |
| <a href="#">Details</a> | 88  | 87 | hsa-miR-125a-5p | <a href="#">MAMDC2</a>   | MAM domain containing 2                                                                                          |
| <a href="#">Details</a> | 89  | 86 | hsa-miR-125a-5p | <a href="#">TAF9B</a>    | TAF9B RNA polymerase II, TATA box binding protein (TBP)-associated factor, 31kDa                                 |
| <a href="#">Details</a> | 90  | 86 | hsa-miR-125a-5p | <a href="#">ATP10D</a>   | ATPase, class V, type 10D                                                                                        |
| <a href="#">Details</a> | 91  | 86 | hsa-miR-125a-5p | <a href="#">SYVN1</a>    | synovial apoptosis inhibitor 1, synoviolin                                                                       |
| <a href="#">Details</a> | 92  | 86 | hsa-miR-125a-5p | <a href="#">DAAM1</a>    | dishevelled associated activator of morphogenesis 1                                                              |
| <a href="#">Details</a> | 93  | 86 | hsa-miR-125a-5p | <a href="#">KCTD15</a>   | potassium channel tetramerization domain containing 15                                                           |
| <a href="#">Details</a> | 94  | 86 | hsa-miR-125a-5p | <a href="#">TOR2A</a>    | torsin family 2, member A                                                                                        |
| <a href="#">Details</a> | 95  | 86 | hsa-miR-125a-5p | <a href="#">DIP2A</a>    | DIP2 disco-interacting protein 2 homolog A (Drosophila)                                                          |
| <a href="#">Details</a> | 96  | 86 | hsa-miR-125a-5p | <a href="#">OAZ2</a>     | ornithine decarboxylase antizyme 2                                                                               |
| <a href="#">Details</a> | 97  | 86 | hsa-miR-125a-5p | <a href="#">MTUS1</a>    | microtubule associated tumor suppressor 1                                                                        |
| <a href="#">Details</a> | 98  | 86 | hsa-miR-125a-5p | <a href="#">MAP6</a>     | microtubule-associated protein 6                                                                                 |
| <a href="#">Details</a> | 99  | 86 | hsa-miR-125a-5p | <a href="#">DUS1L</a>    | dihydrouridine synthase 1-like (S. cerevisiae)                                                                   |
| <a href="#">Details</a> | 100 | 86 | hsa-miR-125a-5p | <a href="#">CDK16</a>    | cyclin-dependent kinase 16                                                                                       |
| <a href="#">Details</a> | 101 | 85 | hsa-miR-125a-5p | <a href="#">DPH2</a>     | DPH2 homolog (S. cerevisiae)                                                                                     |
| <a href="#">Details</a> | 102 | 85 | hsa-miR-125a-5p | <a href="#">CSDE1</a>    | cold shock domain containing E1, RNA-binding                                                                     |
| <a href="#">Details</a> | 103 | 85 | hsa-miR-125a-5p | <a href="#">DHX33</a>    | DEAH (Asp-Glu-Ala-His) box polypeptide 33                                                                        |
| <a href="#">Details</a> | 104 | 85 | hsa-miR-125a-5p | <a href="#">CEP85</a>    | centrosomal protein 85kDa                                                                                        |
| <a href="#">Details</a> | 105 | 85 | hsa-miR-125a-5p | <a href="#">BTG2</a>     | BTG family, member 2                                                                                             |
| <a href="#">Details</a> | 106 | 85 | hsa-miR-125a-5p | <a href="#">TNFSF4</a>   | tumor necrosis factor (ligand) superfamily, member 4                                                             |
| <a href="#">Details</a> | 107 | 85 | hsa-miR-125a-5p | <a href="#">DIRAS1</a>   | DIRAS family, GTP-binding RAS-like 1                                                                             |
| <a href="#">Details</a> | 108 | 85 | hsa-miR-125a-5p | <a href="#">SLITRK6</a>  | SLIT and NTRK-like family, member 6                                                                              |
| <a href="#">Details</a> | 109 | 85 | hsa-miR-125a-5p | <a href="#">ACHE</a>     | acetylcholinesterase (Yt blood group)                                                                            |
| <a href="#">Details</a> | 110 | 85 | hsa-miR-125a-5p | <a href="#">EIF1AD</a>   | eukaryotic translation initiation factor 1A domain containing                                                    |
| <a href="#">Details</a> | 111 | 84 | hsa-miR-125a-5p | <a href="#">NR6A1</a>    | nuclear receptor subfamily 6, group A, member 1                                                                  |
| <a href="#">Details</a> | 112 | 84 | hsa-miR-125a-5p | <a href="#">SLC37A2</a>  | solute carrier family 37 (glucose-6-phosphate transporter), member 2                                             |
| <a href="#">Details</a> | 113 | 84 | hsa-miR-125a-5p | <a href="#">RUFY3</a>    | RUN and FYVE domain containing 3                                                                                 |

|                         |     |    |                 |                          |                                                                                                                  |
|-------------------------|-----|----|-----------------|--------------------------|------------------------------------------------------------------------------------------------------------------|
| <a href="#">Details</a> | 114 | 84 | hsa-miR-125a-5p | <a href="#">GTF3C3</a>   | general transcription factor IIIC, polypeptide 3, 102kDa                                                         |
| <a href="#">Details</a> | 115 | 84 | hsa-miR-125a-5p | <a href="#">CYP24A1</a>  | cytochrome P450, family 24, subfamily A, polypeptide 1                                                           |
| <a href="#">Details</a> | 116 | 84 | hsa-miR-125a-5p | <a href="#">ZC3H7B</a>   | zinc finger CCCH-type containing 7B                                                                              |
| <a href="#">Details</a> | 117 | 84 | hsa-miR-125a-5p | <a href="#">TMEM174</a>  | transmembrane protein 174                                                                                        |
| <a href="#">Details</a> | 118 | 83 | hsa-miR-125a-5p | <a href="#">KLC2</a>     | kinesin light chain 2                                                                                            |
| <a href="#">Details</a> | 119 | 83 | hsa-miR-125a-5p | <a href="#">MAPRE2</a>   | microtubule-associated protein, RP/EB family, member 2                                                           |
| <a href="#">Details</a> | 120 | 83 | hsa-miR-125a-5p | <a href="#">IL16</a>     | interleukin 16                                                                                                   |
| <a href="#">Details</a> | 121 | 83 | hsa-miR-125a-5p | <a href="#">ZNF385A</a>  | zinc finger protein 385A                                                                                         |
| <a href="#">Details</a> | 122 | 83 | hsa-miR-125a-5p | <a href="#">BCL2L14</a>  | BCL2-like 14 (apoptosis facilitator)                                                                             |
| <a href="#">Details</a> | 123 | 83 | hsa-miR-125a-5p | <a href="#">ATP8B2</a>   | ATPase, aminophospholipid transporter, class I, type 8B, member 2                                                |
| <a href="#">Details</a> | 124 | 83 | hsa-miR-125a-5p | <a href="#">KLHL25</a>   | kelch-like family member 25                                                                                      |
| <a href="#">Details</a> | 125 | 83 | hsa-miR-125a-5p | <a href="#">FAM169B</a>  | family with sequence similarity 169, member B                                                                    |
| <a href="#">Details</a> | 126 | 82 | hsa-miR-125a-5p | <a href="#">FIBP</a>     | fibroblast growth factor (acidic) intracellular binding protein                                                  |
| <a href="#">Details</a> | 127 | 82 | hsa-miR-125a-5p | <a href="#">CDR2L</a>    | cerebellar degeneration-related protein 2-like                                                                   |
| <a href="#">Details</a> | 128 | 82 | hsa-miR-125a-5p | <a href="#">LCOR</a>     | ligand dependent nuclear receptor corepressor                                                                    |
| <a href="#">Details</a> | 129 | 82 | hsa-miR-125a-5p | <a href="#">HNRNPUL2</a> | heterogeneous nuclear ribonucleoprotein U-like 2                                                                 |
| <a href="#">Details</a> | 130 | 82 | hsa-miR-125a-5p | <a href="#">PRSS35</a>   | protease, serine, 35                                                                                             |
| <a href="#">Details</a> | 131 | 81 | hsa-miR-125a-5p | <a href="#">LFNG</a>     | LFNG O-fucosylpeptide 3-beta-N-acetylglucosaminyltransferase                                                     |
| <a href="#">Details</a> | 132 | 81 | hsa-miR-125a-5p | <a href="#">SEMA4B</a>   | sema domain, immunoglobulin domain (Ig), transmembrane domain (TM) and short cytoplasmic domain, (semaphorin) 4B |
| <a href="#">Details</a> | 133 | 81 | hsa-miR-125a-5p | <a href="#">ELAC2</a>    | elaC ribonuclease Z 2                                                                                            |
| <a href="#">Details</a> | 134 | 81 | hsa-miR-125a-5p | <a href="#">SCARB2</a>   | scavenger receptor class B, member 2                                                                             |
| <a href="#">Details</a> | 135 | 81 | hsa-miR-125a-5p | <a href="#">DIS3L2</a>   | DIS3 like 3'-5' exoribonuclease 2                                                                                |
| <a href="#">Details</a> | 136 | 81 | hsa-miR-125a-5p | <a href="#">DYNLT3</a>   | dynein, light chain, Tctex-type 3                                                                                |
| <a href="#">Details</a> | 137 | 81 | hsa-miR-125a-5p | <a href="#">SLC25A15</a> | solute carrier family 25 (mitochondrial carrier; ornithine transporter) member 15                                |
| <a href="#">Details</a> | 138 | 81 | hsa-miR-125a-5p | <a href="#">NT5DC1</a>   | 5'-nucleotidase domain containing 1                                                                              |
| <a href="#">Details</a> | 139 | 81 | hsa-miR-125a-5p | <a href="#">LIPA</a>     | lipase A, lysosomal acid, cholesterol esterase                                                                   |
| <a href="#">Details</a> | 140 | 81 | hsa-miR-125a-5p | <a href="#">SCARB1</a>   | scavenger receptor class B, member 1                                                                             |
| <a href="#">Details</a> | 141 | 81 | hsa-miR-125a-5p | <a href="#">GORASP1</a>  | golgi reassembly stacking protein 1, 65kDa                                                                       |
| <a href="#">Details</a> | 142 | 81 | hsa-miR-125a-5p | <a href="#">TMEM151A</a> | transmembrane protein 151A                                                                                       |
| <a href="#">Details</a> | 143 | 81 | hsa-miR-125a-5p | <a href="#">EVA1A</a>    | eva-1 homolog A (C. elegans)                                                                                     |
| <a href="#">Details</a> | 144 | 80 | hsa-miR-125a-5p | <a href="#">PIK3R5</a>   | phosphoinositide-3-kinase, regulatory subunit 5                                                                  |
| <a href="#">Details</a> | 145 | 80 | hsa-miR-125a-5p | <a href="#">SAMD14</a>   | sterile alpha motif domain containing 14                                                                         |
| <a href="#">Details</a> | 146 | 80 | hsa-miR-125a-5p | <a href="#">SLC4A10</a>  | solute carrier family 4, sodium bicarbonate transporter, member 10                                               |
| <a href="#">Details</a> | 147 | 80 | hsa-miR-125a-5p | <a href="#">LIN28A</a>   | lin-28 homolog A (C. elegans)                                                                                    |
| <a href="#">Details</a> | 148 | 80 | hsa-miR-125a-5p | <a href="#">NDUFA2</a>   | NADH dehydrogenase (ubiquinone) 1 alpha subcomplex, 2, 8kDa                                                      |
| <a href="#">Details</a> | 149 | 80 | hsa-miR-125a-5p | <a href="#">NCAN</a>     | neurocan                                                                                                         |
| <a href="#">Details</a> | 150 | 80 | hsa-miR-125a-5p | <a href="#">FAM78A</a>   | family with sequence similarity 78, member A                                                                     |
| <a href="#">Details</a> | 151 | 80 | hsa-miR-125a-5p | <a href="#">C19orf38</a> | chromosome 19 open reading frame 38                                                                              |

|                         |     |    |                 |                          |                                                                                                     |
|-------------------------|-----|----|-----------------|--------------------------|-----------------------------------------------------------------------------------------------------|
| <a href="#">Details</a> | 152 | 80 | hsa-miR-125a-5p | <a href="#">PPME1</a>    | protein phosphatase methylesterase 1                                                                |
| <a href="#">Details</a> | 153 | 80 | hsa-miR-125a-5p | <a href="#">TRPS1</a>    | trichorhinophalangeal syndrome I                                                                    |
| <a href="#">Details</a> | 154 | 79 | hsa-miR-125a-5p | <a href="#">TP53INP1</a> | tumor protein p53 inducible nuclear protein 1                                                       |
| <a href="#">Details</a> | 155 | 79 | hsa-miR-125a-5p | <a href="#">CSNK2A1</a>  | casein kinase 2, alpha 1 polypeptide                                                                |
| <a href="#">Details</a> | 156 | 79 | hsa-miR-125a-5p | <a href="#">PXMP4</a>    | peroxisomal membrane protein 4, 24kDa                                                               |
| <a href="#">Details</a> | 157 | 79 | hsa-miR-125a-5p | <a href="#">PCGF6</a>    | polycomb group ring finger 6                                                                        |
| <a href="#">Details</a> | 158 | 79 | hsa-miR-125a-5p | <a href="#">PODXL</a>    | podocalyxin-like                                                                                    |
| <a href="#">Details</a> | 159 | 79 | hsa-miR-125a-5p | <a href="#">LBH</a>      | limb bud and heart development                                                                      |
| <a href="#">Details</a> | 160 | 79 | hsa-miR-125a-5p | <a href="#">CORO2A</a>   | coronin, actin binding protein, 2A                                                                  |
| <a href="#">Details</a> | 161 | 79 | hsa-miR-125a-5p | <a href="#">GPC6</a>     | glypican 6                                                                                          |
| <a href="#">Details</a> | 162 | 79 | hsa-miR-125a-5p | <a href="#">SSTR3</a>    | somatostatin receptor 3                                                                             |
| <a href="#">Details</a> | 163 | 79 | hsa-miR-125a-5p | <a href="#">TRAPPC6B</a> | trafficking protein particle complex 6B                                                             |
| <a href="#">Details</a> | 164 | 79 | hsa-miR-125a-5p | <a href="#">RAB8B</a>    | RAB8B, member RAS oncogene family                                                                   |
| <a href="#">Details</a> | 165 | 79 | hsa-miR-125a-5p | <a href="#">CLN6</a>     | ceroid-lipofuscinosis, neuronal 6, late infantile, variant                                          |
| <a href="#">Details</a> | 166 | 78 | hsa-miR-125a-5p | <a href="#">DICER1</a>   | dicer 1, ribonuclease type III                                                                      |
| <a href="#">Details</a> | 167 | 78 | hsa-miR-125a-5p | <a href="#">FAM134A</a>  | family with sequence similarity 134, member A                                                       |
| <a href="#">Details</a> | 168 | 78 | hsa-miR-125a-5p | <a href="#">CRB2</a>     | crumbs family member 2                                                                              |
| <a href="#">Details</a> | 169 | 78 | hsa-miR-125a-5p | <a href="#">SH3BP5L</a>  | SH3-binding domain protein 5-like                                                                   |
| <a href="#">Details</a> | 170 | 78 | hsa-miR-125a-5p | <a href="#">DENND6A</a>  | DENN/MADD domain containing 6A                                                                      |
| <a href="#">Details</a> | 171 | 78 | hsa-miR-125a-5p | <a href="#">C2orf43</a>  | chromosome 2 open reading frame 43                                                                  |
| <a href="#">Details</a> | 172 | 78 | hsa-miR-125a-5p | <a href="#">TIMM17B</a>  | translocase of inner mitochondrial membrane 17 homolog B (yeast)                                    |
| <a href="#">Details</a> | 173 | 78 | hsa-miR-125a-5p | <a href="#">RHOQ</a>     | ras homolog family member Q                                                                         |
| <a href="#">Details</a> | 174 | 78 | hsa-miR-125a-5p | <a href="#">SLC46A3</a>  | solute carrier family 46, member 3                                                                  |
| <a href="#">Details</a> | 175 | 78 | hsa-miR-125a-5p | <a href="#">GPC4</a>     | glypican 4                                                                                          |
| <a href="#">Details</a> | 176 | 78 | hsa-miR-125a-5p | <a href="#">ZNF80</a>    | zinc finger protein 80                                                                              |
| <a href="#">Details</a> | 177 | 77 | hsa-miR-125a-5p | <a href="#">FBXW4</a>    | F-box and WD repeat domain containing 4                                                             |
| <a href="#">Details</a> | 178 | 77 | hsa-miR-125a-5p | <a href="#">MYO18A</a>   | myosin XVIIIIA                                                                                      |
| <a href="#">Details</a> | 179 | 77 | hsa-miR-125a-5p | <a href="#">PPAT</a>     | phosphoribosyl pyrophosphate amidotransferase                                                       |
| <a href="#">Details</a> | 180 | 77 | hsa-miR-125a-5p | <a href="#">AMIGO2</a>   | adhesion molecule with Ig-like domain 2                                                             |
| <a href="#">Details</a> | 181 | 77 | hsa-miR-125a-5p | <a href="#">ANKRD29</a>  | ankyrin repeat domain 29                                                                            |
| <a href="#">Details</a> | 182 | 77 | hsa-miR-125a-5p | <a href="#">ATP1B4</a>   | ATPase, Na <sup>+</sup> /K <sup>+</sup> transporting, beta 4 polypeptide                            |
| <a href="#">Details</a> | 183 | 77 | hsa-miR-125a-5p | <a href="#">SCN4A</a>    | sodium channel, voltage-gated, type IV, alpha subunit                                               |
| <a href="#">Details</a> | 184 | 77 | hsa-miR-125a-5p | <a href="#">RPS6KA1</a>  | ribosomal protein S6 kinase, 90kDa, polypeptide 1                                                   |
| <a href="#">Details</a> | 185 | 77 | hsa-miR-125a-5p | <a href="#">CGREF1</a>   | cell growth regulator with EF-hand domain 1                                                         |
| <a href="#">Details</a> | 186 | 77 | hsa-miR-125a-5p | <a href="#">C1orf210</a> | chromosome 1 open reading frame 210                                                                 |
| <a href="#">Details</a> | 187 | 77 | hsa-miR-125a-5p | <a href="#">KCNA7</a>    | potassium voltage-gated channel, shaker-related subfamily, member 7                                 |
| <a href="#">Details</a> | 188 | 77 | hsa-miR-125a-5p | <a href="#">KCNA1</a>    | potassium voltage-gated channel, shaker-related subfamily, member 1 (episodic ataxia with myokymia) |
| <a href="#">Details</a> | 189 | 77 | hsa-miR-125a-5p | <a href="#">MEGF8</a>    | multiple EGF-like-domains 8                                                                         |
| <a href="#">Details</a> | 190 | 77 | hsa-miR-125a-5p | <a href="#">DDX42</a>    | DEAD (Asp-Glu-Ala-Asp) box helicase 42                                                              |
| <a href="#">Details</a> | 191 | 77 | hsa-miR-125a-5p | <a href="#">ETS1</a>     | v-ets avian erythroblastosis virus E26 oncogene homolog 1                                           |
| <a href="#">Details</a> | 192 | 76 | hsa-miR-125a-5p | <a href="#">OPALIN</a>   | oligodendrocytic myelin paranodal and inner loop protein                                            |
| <a href="#">Details</a> | 193 | 76 | hsa-miR-125a-5p | <a href="#">SEMA4C</a>   | sema domain, immunoglobulin domain (Ig), transmembrane domain (TM) and                              |

|                         |     |    |                 |                         |                                                                      |
|-------------------------|-----|----|-----------------|-------------------------|----------------------------------------------------------------------|
|                         |     |    |                 |                         | short cytoplasmic domain, (semaphorin) 4C                            |
| <a href="#">Details</a> | 194 | 76 | hsa-miR-125a-5p | <a href="#">KHNYN</a>   | KH and NYN domain containing                                         |
| <a href="#">Details</a> | 195 | 76 | hsa-miR-125a-5p | <a href="#">SH3TC2</a>  | SH3 domain and tetratricopeptide repeats 2                           |
| <a href="#">Details</a> | 196 | 76 | hsa-miR-125a-5p | <a href="#">KCTD21</a>  | potassium channel tetramerization domain containing 21               |
| <a href="#">Details</a> | 197 | 76 | hsa-miR-125a-5p | <a href="#">PTPN1</a>   | protein tyrosine phosphatase, non-receptor type 1                    |
| <a href="#">Details</a> | 198 | 76 | hsa-miR-125a-5p | <a href="#">KLHL24</a>  | kelch-like family member 24                                          |
| <a href="#">Details</a> | 199 | 76 | hsa-miR-125a-5p | <a href="#">ASB13</a>   | ankyrin repeat and SOCS box containing 13                            |
| <a href="#">Details</a> | 200 | 76 | hsa-miR-125a-5p | <a href="#">CPSF6</a>   | cleavage and polyadenylation specific factor 6, 68kDa                |
| <a href="#">Details</a> | 201 | 76 | hsa-miR-125a-5p | <a href="#">MUL1</a>    | mitochondrial E3 ubiquitin protein ligase 1                          |
| <a href="#">Details</a> | 202 | 76 | hsa-miR-125a-5p | <a href="#">RREB1</a>   | ras responsive element binding protein 1                             |
| <a href="#">Details</a> | 203 | 76 | hsa-miR-125a-5p | <a href="#">PDZD3</a>   | PDZ domain containing 3                                              |
| <a href="#">Details</a> | 204 | 76 | hsa-miR-125a-5p | <a href="#">MYT1</a>    | myelin transcription factor 1                                        |
| <a href="#">Details</a> | 205 | 76 | hsa-miR-125a-5p | <a href="#">REST</a>    | RE1-silencing transcription factor                                   |
| <a href="#">Details</a> | 206 | 75 | hsa-miR-125a-5p | <a href="#">DAAM2</a>   | dishevelled associated activator of morphogenesis 2                  |
| <a href="#">Details</a> | 207 | 75 | hsa-miR-125a-5p | <a href="#">SMCR8</a>   | Smith-Magenis syndrome chromosome region, candidate 8                |
| <a href="#">Details</a> | 208 | 75 | hsa-miR-125a-5p | <a href="#">MMP11</a>   | matrix metalloproteinase 11 (stromelysin 3)                          |
| <a href="#">Details</a> | 209 | 75 | hsa-miR-125a-5p | <a href="#">DLD</a>     | dihydrolipoamide dehydrogenase                                       |
| <a href="#">Details</a> | 210 | 75 | hsa-miR-125a-5p | <a href="#">NUP210</a>  | nucleoporin 210kDa                                                   |
| <a href="#">Details</a> | 211 | 75 | hsa-miR-125a-5p | <a href="#">CACNA1B</a> | calcium channel, voltage-dependent, N type, alpha 1B subunit         |
| <a href="#">Details</a> | 212 | 75 | hsa-miR-125a-5p | <a href="#">FOXS1</a>   | forkhead box S1                                                      |
| <a href="#">Details</a> | 213 | 75 | hsa-miR-125a-5p | <a href="#">HAPLN1</a>  | hyaluronan and proteoglycan link protein 1                           |
| <a href="#">Details</a> | 214 | 75 | hsa-miR-125a-5p | <a href="#">KCNH4</a>   | potassium voltage-gated channel, subfamily H (eag-related), member 4 |
| <a href="#">Details</a> | 215 | 75 | hsa-miR-125a-5p | <a href="#">USP46</a>   | ubiquitin specific peptidase 46                                      |
| <a href="#">Details</a> | 216 | 75 | hsa-miR-125a-5p | <a href="#">FLOT2</a>   | flotillin 2                                                          |
| <a href="#">Details</a> | 217 | 74 | hsa-miR-125a-5p | <a href="#">SUV39H1</a> | suppressor of variegation 3-9 homolog 1 (Drosophila)                 |
| <a href="#">Details</a> | 218 | 74 | hsa-miR-125a-5p | <a href="#">TMEM123</a> | transmembrane protein 123                                            |
| <a href="#">Details</a> | 219 | 74 | hsa-miR-125a-5p | <a href="#">TRIM14</a>  | tripartite motif containing 14                                       |
| <a href="#">Details</a> | 220 | 74 | hsa-miR-125a-5p | <a href="#">ZSWIM4</a>  | zinc finger, SWIM-type containing 4                                  |
| <a href="#">Details</a> | 221 | 74 | hsa-miR-125a-5p | <a href="#">MAP3K9</a>  | mitogen-activated protein kinase kinase kinase 9                     |
| <a href="#">Details</a> | 222 | 74 | hsa-miR-125a-5p | <a href="#">AREL1</a>   | apoptosis resistant E3 ubiquitin protein ligase 1                    |
| <a href="#">Details</a> | 223 | 74 | hsa-miR-125a-5p | <a href="#">ZNF691</a>  | zinc finger protein 691                                              |
| <a href="#">Details</a> | 224 | 74 | hsa-miR-125a-5p | <a href="#">ABR</a>     | active BCR-related                                                   |
| <a href="#">Details</a> | 225 | 74 | hsa-miR-125a-5p | <a href="#">PRDM1</a>   | PR domain containing 1, with ZNF domain                              |
| <a href="#">Details</a> | 226 | 73 | hsa-miR-125a-5p | <a href="#">ERMP1</a>   | endoplasmic reticulum metalloproteinase 1                            |
| <a href="#">Details</a> | 227 | 73 | hsa-miR-125a-5p | <a href="#">CECR6</a>   | cat eye syndrome chromosome region, candidate 6                      |
| <a href="#">Details</a> | 228 | 73 | hsa-miR-125a-5p | <a href="#">USP37</a>   | ubiquitin specific peptidase 37                                      |
| <a href="#">Details</a> | 229 | 73 | hsa-miR-125a-5p | <a href="#">MSRB3</a>   | methionine sulfoxide reductase B3                                    |
| <a href="#">Details</a> | 230 | 73 | hsa-miR-125a-5p | <a href="#">IST1</a>    | increased sodium tolerance 1 homolog (yeast)                         |
| <a href="#">Details</a> | 231 | 73 | hsa-miR-125a-5p | <a href="#">MFHAS1</a>  | malignant fibrous histiocytoma amplified sequence 1                  |
| <a href="#">Details</a> | 232 | 73 | hsa-miR-125a-5p | <a href="#">SBNO1</a>   | strawberry notch homolog 1 (Drosophila)                              |

|                         |     |    |                 |                           |                                                                               |
|-------------------------|-----|----|-----------------|---------------------------|-------------------------------------------------------------------------------|
| <a href="#">Details</a> | 233 | 73 | hsa-miR-125a-5p | <a href="#">SAMD10</a>    | sterile alpha motif domain containing 10                                      |
| <a href="#">Details</a> | 234 | 72 | hsa-miR-125a-5p | <a href="#">ELMSAN1</a>   | ELM2 and Myb/SANT-like domain containing 1                                    |
| <a href="#">Details</a> | 235 | 72 | hsa-miR-125a-5p | <a href="#">SPATA31D3</a> | SPATA31 subfamily D, member 3                                                 |
| <a href="#">Details</a> | 236 | 72 | hsa-miR-125a-5p | <a href="#">SPATA31D4</a> | SPATA31 subfamily D, member 4                                                 |
| <a href="#">Details</a> | 237 | 72 | hsa-miR-125a-5p | <a href="#">BAG4</a>      | BCL2-associated athanogene 4                                                  |
| <a href="#">Details</a> | 238 | 72 | hsa-miR-125a-5p | <a href="#">VDR</a>       | vitamin D (1,25- dihydroxyvitamin D3) receptor                                |
| <a href="#">Details</a> | 239 | 72 | hsa-miR-125a-5p | <a href="#">NBEAL2</a>    | neurobeachin-like 2                                                           |
| <a href="#">Details</a> | 240 | 72 | hsa-miR-125a-5p | <a href="#">MCTP2</a>     | multiple C2 domains, transmembrane 2                                          |
| <a href="#">Details</a> | 241 | 71 | hsa-miR-125a-5p | <a href="#">OVOL1</a>     | ovo-like zinc finger 1                                                        |
| <a href="#">Details</a> | 242 | 71 | hsa-miR-125a-5p | <a href="#">SCLY</a>      | selenocysteine lyase                                                          |
| <a href="#">Details</a> | 243 | 71 | hsa-miR-125a-5p | <a href="#">TRIM9</a>     | tripartite motif containing 9                                                 |
| <a href="#">Details</a> | 244 | 71 | hsa-miR-125a-5p | <a href="#">MAT1A</a>     | methionine adenosyltransferase I, alpha                                       |
| <a href="#">Details</a> | 245 | 71 | hsa-miR-125a-5p | <a href="#">AGO2</a>      | argonaute RISC catalytic component 2                                          |
| <a href="#">Details</a> | 246 | 71 | hsa-miR-125a-5p | <a href="#">PKP1</a>      | plakophilin 1 (ectodermal dysplasia/skin fragility syndrome)                  |
| <a href="#">Details</a> | 247 | 71 | hsa-miR-125a-5p | <a href="#">ABTB1</a>     | ankyrin repeat and BTB (POZ) domain containing 1                              |
| <a href="#">Details</a> | 248 | 71 | hsa-miR-125a-5p | <a href="#">ITGA9</a>     | integrin, alpha 9                                                             |
| <a href="#">Details</a> | 249 | 71 | hsa-miR-125a-5p | <a href="#">ZNF3</a>      | zinc and ring finger 3                                                        |
| <a href="#">Details</a> | 250 | 71 | hsa-miR-125a-5p | <a href="#">UBE2R2</a>    | ubiquitin-conjugating enzyme E2R 2                                            |
| <a href="#">Details</a> | 251 | 71 | hsa-miR-125a-5p | <a href="#">GANC</a>      | glucosidase, alpha; neutral C                                                 |
| <a href="#">Details</a> | 252 | 70 | hsa-miR-125a-5p | <a href="#">C1orf116</a>  | chromosome 1 open reading frame 116                                           |
| <a href="#">Details</a> | 253 | 70 | hsa-miR-125a-5p | <a href="#">TTC19</a>     | tetratricopeptide repeat domain 19                                            |
| <a href="#">Details</a> | 254 | 70 | hsa-miR-125a-5p | <a href="#">JADE2</a>     | jade family PHD finger 2                                                      |
| <a href="#">Details</a> | 255 | 70 | hsa-miR-125a-5p | <a href="#">DRP2</a>      | dystrophin related protein 2                                                  |
| <a href="#">Details</a> | 256 | 70 | hsa-miR-125a-5p | <a href="#">TRIL</a>      | TLR4 interactor with leucine-rich repeats                                     |
| <a href="#">Details</a> | 257 | 70 | hsa-miR-125a-5p | <a href="#">LIN28B</a>    | lin-28 homolog B (C. elegans)                                                 |
| <a href="#">Details</a> | 258 | 70 | hsa-miR-125a-5p | <a href="#">WIPF2</a>     | WAS/WASL interacting protein family, member 2                                 |
| <a href="#">Details</a> | 259 | 70 | hsa-miR-125a-5p | <a href="#">PROX2</a>     | prospero homeobox 2                                                           |
| <a href="#">Details</a> | 260 | 70 | hsa-miR-125a-5p | <a href="#">XKRX</a>      | XK, Kell blood group complex subunit-related, X-linked                        |
| <a href="#">Details</a> | 261 | 69 | hsa-miR-125a-5p | <a href="#">APOBEC4</a>   | apolipoprotein B mRNA editing enzyme, catalytic polypeptide-like 4 (putative) |
| <a href="#">Details</a> | 262 | 69 | hsa-miR-125a-5p | <a href="#">NRXN1</a>     | neurexin 1                                                                    |
| <a href="#">Details</a> | 263 | 69 | hsa-miR-125a-5p | <a href="#">MAP3K11</a>   | mitogen-activated protein kinase kinase kinase 11                             |
| <a href="#">Details</a> | 264 | 69 | hsa-miR-125a-5p | <a href="#">GGT7</a>      | gamma-glutamyltransferase 7                                                   |
| <a href="#">Details</a> | 265 | 69 | hsa-miR-125a-5p | <a href="#">CIAPIN1</a>   | cytokine induced apoptosis inhibitor 1                                        |
| <a href="#">Details</a> | 266 | 69 | hsa-miR-125a-5p | <a href="#">MEIS2</a>     | Meis homeobox 2                                                               |
| <a href="#">Details</a> | 267 | 69 | hsa-miR-125a-5p | <a href="#">GGA2</a>      | golgi-associated, gamma adaptin ear containing, ARF binding protein 2         |
| <a href="#">Details</a> | 268 | 69 | hsa-miR-125a-5p | <a href="#">ALPK3</a>     | alpha-kinase 3                                                                |
| <a href="#">Details</a> | 269 | 69 | hsa-miR-125a-5p | <a href="#">KIAA1841</a>  | KIAA1841                                                                      |
| <a href="#">Details</a> | 270 | 69 | hsa-miR-125a-5p | <a href="#">SETD6</a>     | SET domain containing 6                                                       |
| <a href="#">Details</a> | 271 | 68 | hsa-miR-125a-5p | <a href="#">BRPF3</a>     | bromodomain and PHD finger containing, 3                                      |
| <a href="#">Details</a> | 272 | 68 | hsa-miR-125a-5p | <a href="#">GPR153</a>    | G protein-coupled receptor 153                                                |
| <a href="#">Details</a> | 273 | 68 | hsa-miR-125a-5p | <a href="#">TSPAN11</a>   | tetraspanin 11                                                                |
| <a href="#">Details</a> | 274 | 68 | hsa-miR-125a-5p | <a href="#">IL31</a>      | interleukin 31                                                                |
| <a href="#">Details</a> | 275 | 68 | hsa-miR-125a-5p | <a href="#">RFX3</a>      | regulatory factor X, 3 (influences HLA class II expression)                   |
| <a href="#">Details</a> | 276 | 68 | hsa-miR-125a-5p | <a href="#">BDH1</a>      | 3-hydroxybutyrate dehydrogenase, type 1                                       |
| <a href="#">Details</a> | 277 | 68 | hsa-miR-125a-5p | <a href="#">SNX27</a>     | sorting nexin family member 27                                                |

|                         |     |    |                 |                              |                                                                      |
|-------------------------|-----|----|-----------------|------------------------------|----------------------------------------------------------------------|
| <a href="#">Details</a> | 278 | 68 | hsa-miR-125a-5p | <a href="#">SZRD1</a>        | SUZ RNA binding domain containing 1                                  |
| <a href="#">Details</a> | 279 | 68 | hsa-miR-125a-5p | <a href="#">RPL28</a>        | ribosomal protein L28                                                |
| <a href="#">Details</a> | 280 | 68 | hsa-miR-125a-5p | <a href="#">RASGRF1</a>      | Ras protein-specific guanine nucleotide-releasing factor 1           |
| <a href="#">Details</a> | 281 | 68 | hsa-miR-125a-5p | <a href="#">TMPRSS13</a>     | transmembrane protease, serine 13                                    |
| <a href="#">Details</a> | 282 | 67 | hsa-miR-125a-5p | <a href="#">GTPBP2</a>       | GTP binding protein 2                                                |
| <a href="#">Details</a> | 283 | 67 | hsa-miR-125a-5p | <a href="#">FMNL3</a>        | formin-like 3                                                        |
| <a href="#">Details</a> | 284 | 67 | hsa-miR-125a-5p | <a href="#">TMEM168</a>      | transmembrane protein 168                                            |
| <a href="#">Details</a> | 285 | 67 | hsa-miR-125a-5p | <a href="#">ABL2</a>         | c-abl oncogene 2, non-receptor tyrosine kinase                       |
| <a href="#">Details</a> | 286 | 67 | hsa-miR-125a-5p | <a href="#">IKZF4</a>        | IKAROS family zinc finger 4 (Eos)                                    |
| <a href="#">Details</a> | 287 | 66 | hsa-miR-125a-5p | <a href="#">SYT7</a>         | synaptotagmin VII                                                    |
| <a href="#">Details</a> | 288 | 66 | hsa-miR-125a-5p | <a href="#">LRP4</a>         | low density lipoprotein receptor-related protein 4                   |
| <a href="#">Details</a> | 289 | 66 | hsa-miR-125a-5p | <a href="#">MRAP</a>         | melanocortin 2 receptor accessory protein                            |
| <a href="#">Details</a> | 290 | 66 | hsa-miR-125a-5p | <a href="#">PSAPL1</a>       | prosaposin-like 1 (gene/pseudogene)                                  |
| <a href="#">Details</a> | 291 | 66 | hsa-miR-125a-5p | <a href="#">LOC101927903</a> | protein FAM27D1-like                                                 |
| <a href="#">Details</a> | 292 | 65 | hsa-miR-125a-5p | <a href="#">USP2</a>         | ubiquitin specific peptidase 2                                       |
| <a href="#">Details</a> | 293 | 65 | hsa-miR-125a-5p | <a href="#">TAPBP</a>        | TAP binding protein (tapasin)                                        |
| <a href="#">Details</a> | 294 | 65 | hsa-miR-125a-5p | <a href="#">LPIN3</a>        | lipin 3                                                              |
| <a href="#">Details</a> | 295 | 65 | hsa-miR-125a-5p | <a href="#">E2F2</a>         | E2F transcription factor 2                                           |
| <a href="#">Details</a> | 296 | 65 | hsa-miR-125a-5p | <a href="#">FGB</a>          | fibrinogen beta chain                                                |
| <a href="#">Details</a> | 297 | 65 | hsa-miR-125a-5p | <a href="#">TMEM136</a>      | transmembrane protein 136                                            |
| <a href="#">Details</a> | 298 | 65 | hsa-miR-125a-5p | <a href="#">TRIM71</a>       | tripartite motif containing 71, E3 ubiquitin protein ligase          |
| <a href="#">Details</a> | 299 | 65 | hsa-miR-125a-5p | <a href="#">TBC1D1</a>       | TBC1 (tre-2/USP6, BUB2, cdc16) domain family, member 1               |
| <a href="#">Details</a> | 300 | 65 | hsa-miR-125a-5p | <a href="#">MYO7A</a>        | myosin VIIA                                                          |
| <a href="#">Details</a> | 301 | 65 | hsa-miR-125a-5p | <a href="#">DPP9</a>         | dipeptidyl-peptidase 9                                               |
| <a href="#">Details</a> | 302 | 65 | hsa-miR-125a-5p | <a href="#">B3GALNT2</a>     | beta-1,3-N-acetylgalactosaminyltransferase 2                         |
| <a href="#">Details</a> | 303 | 65 | hsa-miR-125a-5p | <a href="#">C18orf54</a>     | chromosome 18 open reading frame 54                                  |
| <a href="#">Details</a> | 304 | 65 | hsa-miR-125a-5p | <a href="#">KLHL6</a>        | kelch-like family member 6                                           |
| <a href="#">Details</a> | 305 | 65 | hsa-miR-125a-5p | <a href="#">ESYT1</a>        | extended synaptotagmin-like protein 1                                |
| <a href="#">Details</a> | 306 | 65 | hsa-miR-125a-5p | <a href="#">SUV420H2</a>     | suppressor of variegation 4-20 homolog 2 (Drosophila)                |
| <a href="#">Details</a> | 307 | 65 | hsa-miR-125a-5p | <a href="#">CYFIP2</a>       | cytoplasmic FMR1 interacting protein 2                               |
| <a href="#">Details</a> | 308 | 65 | hsa-miR-125a-5p | <a href="#">ACTR10</a>       | actin-related protein 10 homolog (S. cerevisiae)                     |
| <a href="#">Details</a> | 309 | 64 | hsa-miR-125a-5p | <a href="#">FMO2</a>         | flavin containing monooxygenase 2 (non-functional)                   |
| <a href="#">Details</a> | 310 | 64 | hsa-miR-125a-5p | <a href="#">POGLUT1</a>      | protein O-glucosyltransferase 1                                      |
| <a href="#">Details</a> | 311 | 64 | hsa-miR-125a-5p | <a href="#">LAMC3</a>        | laminin, gamma 3                                                     |
| <a href="#">Details</a> | 312 | 64 | hsa-miR-125a-5p | <a href="#">ADD2</a>         | adducin 2 (beta)                                                     |
| <a href="#">Details</a> | 313 | 64 | hsa-miR-125a-5p | <a href="#">MICALL1</a>      | MICAL-like 1                                                         |
| <a href="#">Details</a> | 314 | 64 | hsa-miR-125a-5p | <a href="#">ARRB1</a>        | arrestin, beta 1                                                     |
| <a href="#">Details</a> | 315 | 64 | hsa-miR-125a-5p | <a href="#">SLC17A7</a>      | solute carrier family 17 (vesicular glutamate transporter), member 7 |
| <a href="#">Details</a> | 316 | 64 | hsa-miR-125a-5p | <a href="#">SESTD1</a>       | SEC14 and spectrin domains 1                                         |
| <a href="#">Details</a> | 317 | 64 | hsa-miR-125a-5p | <a href="#">KIAA0319L</a>    | KIAA0319-like                                                        |
| <a href="#">Details</a> | 318 | 63 | hsa-miR-125a-5p | <a href="#">GLYCK</a>        | glycerate kinase                                                     |
| <a href="#">Details</a> | 319 | 63 | hsa-miR-125a-5p | <a href="#">TJAP1</a>        | tight junction associated protein 1 (peripheral)                     |
| <a href="#">Details</a> | 320 | 63 | hsa-miR-125a-5p | <a href="#">PAN2</a>         | PAN2 poly(A) specific ribonuclease subunit                           |
| <a href="#">Details</a> | 321 | 63 | hsa-miR-125a-5p | <a href="#">PSMG3</a>        | proteasome (prosome, macropain) assembly chaperone 3                 |
| <a href="#">Details</a> | 322 | 63 | hsa-miR-125a-5p | <a href="#">SNX32</a>        | sorting nexin 32                                                     |



|                         |     |    |                 |                          |                                                                      |
|-------------------------|-----|----|-----------------|--------------------------|----------------------------------------------------------------------|
| <a href="#">Details</a> | 323 | 62 | hsa-miR-125a-5p | <a href="#">H6PD</a>     | hexose-6-phosphate dehydrogenase (glucose 1-dehydrogenase)           |
| <a href="#">Details</a> | 324 | 62 | hsa-miR-125a-5p | <a href="#">GRSF1</a>    | G-rich RNA sequence binding factor 1                                 |
| <a href="#">Details</a> | 325 | 62 | hsa-miR-125a-5p | <a href="#">CDC42SE1</a> | CDC42 small effector 1                                               |
| <a href="#">Details</a> | 326 | 62 | hsa-miR-125a-5p | <a href="#">PARP14</a>   | poly (ADP-ribose) polymerase family, member 14                       |
| <a href="#">Details</a> | 327 | 62 | hsa-miR-125a-5p | <a href="#">KIF24</a>    | kinesin family member 24                                             |
| <a href="#">Details</a> | 328 | 62 | hsa-miR-125a-5p | <a href="#">SULT4A1</a>  | sulfotransferase family 4A, member 1                                 |
| <a href="#">Details</a> | 329 | 62 | hsa-miR-125a-5p | <a href="#">CST9</a>     | cystatin 9 (testatin)                                                |
| <a href="#">Details</a> | 330 | 62 | hsa-miR-125a-5p | <a href="#">HSPB2</a>    | heat shock 27kDa protein 2                                           |
| <a href="#">Details</a> | 331 | 62 | hsa-miR-125a-5p | <a href="#">ASIC1</a>    | acid-sensing (proton-gated) ion channel 1                            |
| <a href="#">Details</a> | 332 | 62 | hsa-miR-125a-5p | <a href="#">CD5L</a>     | CD5 molecule-like                                                    |
| <a href="#">Details</a> | 333 | 62 | hsa-miR-125a-5p | <a href="#">PRTG</a>     | protogenin                                                           |
| <a href="#">Details</a> | 334 | 62 | hsa-miR-125a-5p | <a href="#">UBE2G1</a>   | ubiquitin-conjugating enzyme E2G 1                                   |
| <a href="#">Details</a> | 335 | 62 | hsa-miR-125a-5p | <a href="#">ANKS6</a>    | ankyrin repeat and sterile alpha motif domain containing 6           |
| <a href="#">Details</a> | 336 | 61 | hsa-miR-125a-5p | <a href="#">DCAF10</a>   | DDB1 and CUL4 associated factor 10                                   |
| <a href="#">Details</a> | 337 | 61 | hsa-miR-125a-5p | <a href="#">XKR7</a>     | XK, Kell blood group complex subunit-related family, member 7        |
| <a href="#">Details</a> | 338 | 61 | hsa-miR-125a-5p | <a href="#">MCL1</a>     | myeloid cell leukemia 1                                              |
| <a href="#">Details</a> | 339 | 61 | hsa-miR-125a-5p | <a href="#">ST6GAL1</a>  | ST6 beta-galactosamide alpha-2,6-sialyltransferase 1                 |
| <a href="#">Details</a> | 340 | 61 | hsa-miR-125a-5p | <a href="#">HMG20A</a>   | high mobility group 20A                                              |
| <a href="#">Details</a> | 341 | 61 | hsa-miR-125a-5p | <a href="#">SLC39A13</a> | solute carrier family 39 (zinc transporter), member 13               |
| <a href="#">Details</a> | 342 | 61 | hsa-miR-125a-5p | <a href="#">FAM118A</a>  | family with sequence similarity 118, member A                        |
| <a href="#">Details</a> | 343 | 61 | hsa-miR-125a-5p | <a href="#">CRIPT</a>    | cysteine-rich PDZ-binding protein                                    |
| <a href="#">Details</a> | 344 | 61 | hsa-miR-125a-5p | <a href="#">LRTOMT</a>   | leucine rich transmembrane and O-methyltransferase domain containing |
| <a href="#">Details</a> | 345 | 61 | hsa-miR-125a-5p | <a href="#">RNF168</a>   | ring finger protein 168, E3 ubiquitin protein ligase                 |
| <a href="#">Details</a> | 346 | 61 | hsa-miR-125a-5p | <a href="#">CYB561D1</a> | cytochrome b561 family, member D1                                    |
| <a href="#">Details</a> | 347 | 61 | hsa-miR-125a-5p | <a href="#">ZNF792</a>   | zinc finger protein 792                                              |
| <a href="#">Details</a> | 348 | 61 | hsa-miR-125a-5p | <a href="#">IQSEC2</a>   | IQ motif and Sec7 domain 2                                           |
| <a href="#">Details</a> | 349 | 60 | hsa-miR-125a-5p | <a href="#">MOBP</a>     | myelin-associated oligodendrocyte basic protein                      |
| <a href="#">Details</a> | 350 | 60 | hsa-miR-125a-5p | <a href="#">DDX54</a>    | DEAD (Asp-Glu-Ala-Asp) box polypeptide 54                            |
| <a href="#">Details</a> | 351 | 60 | hsa-miR-125a-5p | <a href="#">MTSS1L</a>   | metastasis suppressor 1-like                                         |
| <a href="#">Details</a> | 352 | 60 | hsa-miR-125a-5p | <a href="#">B3GNT3</a>   | UDP-GlcNAc:betaGal beta-1,3-N-acetylglucosaminyltransferase 3        |
| <a href="#">Details</a> | 353 | 60 | hsa-miR-125a-5p | <a href="#">LAMC2</a>    | laminin, gamma 2                                                     |
| <a href="#">Details</a> | 354 | 60 | hsa-miR-125a-5p | <a href="#">FOXN1</a>    | forkhead box N1                                                      |
| <a href="#">Details</a> | 355 | 60 | hsa-miR-125a-5p | <a href="#">FAM154A</a>  | family with sequence similarity 154, member A                        |
| <a href="#">Details</a> | 356 | 60 | hsa-miR-125a-5p | <a href="#">CDC42BPG</a> | CDC42 binding protein kinase gamma (DMPK-like)                       |
| <a href="#">Details</a> | 357 | 60 | hsa-miR-125a-5p | <a href="#">SWSAP1</a>   | SWIM-type zinc finger 7 associated protein 1                         |
| <a href="#">Details</a> | 358 | 60 | hsa-miR-125a-5p | <a href="#">GALNT7</a>   | polypeptide N-acetylgalactosaminyltransferase 7                      |
| <a href="#">Details</a> | 359 | 60 | hsa-miR-125a-5p | <a href="#">CEP164</a>   | centrosomal protein 164kDa                                           |
| <a href="#">Details</a> | 360 | 59 | hsa-miR-125a-5p | <a href="#">MLX</a>      | MLX, MAX dimerization protein                                        |
| <a href="#">Details</a> | 361 | 59 | hsa-miR-125a-5p | <a href="#">SYN2</a>     | synapsin II                                                          |
| <a href="#">Details</a> | 362 | 59 | hsa-miR-125a-5p | <a href="#">DTNB</a>     | dystrobrevin, beta                                                   |
| <a href="#">Details</a> | 363 | 59 | hsa-miR-125a-5p | <a href="#">SIRT7</a>    | sirtuin 7                                                            |

|                         |     |    |                 |                              |                                                                         |
|-------------------------|-----|----|-----------------|------------------------------|-------------------------------------------------------------------------|
| <a href="#">Details</a> | 364 | 59 | hsa-miR-125a-5p | <a href="#">PHYHIP</a>       | phytanoyl-CoA 2-hydroxylase interacting protein                         |
| <a href="#">Details</a> | 365 | 59 | hsa-miR-125a-5p | <a href="#">ULK3</a>         | unc-51 like kinase 3                                                    |
| <a href="#">Details</a> | 366 | 59 | hsa-miR-125a-5p | <a href="#">TBC1D16</a>      | TBC1 domain family, member 16                                           |
| <a href="#">Details</a> | 367 | 59 | hsa-miR-125a-5p | <a href="#">NAGA</a>         | N-acetylgalactosaminidase, alpha-                                       |
| <a href="#">Details</a> | 368 | 58 | hsa-miR-125a-5p | <a href="#">CHTF8</a>        | CTF8, chromosome transmission fidelity factor 8 homolog (S. cerevisiae) |
| <a href="#">Details</a> | 369 | 58 | hsa-miR-125a-5p | <a href="#">SEC31B</a>       | SEC31 homolog B (S. cerevisiae)                                         |
| <a href="#">Details</a> | 370 | 58 | hsa-miR-125a-5p | <a href="#">TEF</a>          | thyrotrophic embryonic factor                                           |
| <a href="#">Details</a> | 371 | 58 | hsa-miR-125a-5p | <a href="#">LIMK1</a>        | LIM domain kinase 1                                                     |
| <a href="#">Details</a> | 372 | 58 | hsa-miR-125a-5p | <a href="#">FAM53C</a>       | family with sequence similarity 53, member C                            |
| <a href="#">Details</a> | 373 | 58 | hsa-miR-125a-5p | <a href="#">DSG2</a>         | desmoglein 2                                                            |
| <a href="#">Details</a> | 374 | 58 | hsa-miR-125a-5p | <a href="#">GPR107</a>       | G protein-coupled receptor 107                                          |
| <a href="#">Details</a> | 375 | 58 | hsa-miR-125a-5p | <a href="#">PARVG</a>        | parvin, gamma                                                           |
| <a href="#">Details</a> | 376 | 58 | hsa-miR-125a-5p | <a href="#">BRMS1</a>        | breast cancer metastasis suppressor 1                                   |
| <a href="#">Details</a> | 377 | 57 | hsa-miR-125a-5p | <a href="#">LRFN2</a>        | leucine rich repeat and fibronectin type III domain containing 2        |
| <a href="#">Details</a> | 378 | 57 | hsa-miR-125a-5p | <a href="#">EIF2B5</a>       | eukaryotic translation initiation factor 2B, subunit 5 epsilon, 82kDa   |
| <a href="#">Details</a> | 379 | 57 | hsa-miR-125a-5p | <a href="#">LOC100132874</a> | uncharacterized LOC100132874                                            |
| <a href="#">Details</a> | 380 | 57 | hsa-miR-125a-5p | <a href="#">RYBP</a>         | RING1 and YY1 binding protein                                           |
| <a href="#">Details</a> | 381 | 57 | hsa-miR-125a-5p | <a href="#">ANPEP</a>        | alanyl (membrane) aminopeptidase                                        |
| <a href="#">Details</a> | 382 | 57 | hsa-miR-125a-5p | <a href="#">PLEKHM3</a>      | pleckstrin homology domain containing, family M, member 3               |
| <a href="#">Details</a> | 383 | 57 | hsa-miR-125a-5p | <a href="#">RFC5</a>         | replication factor C (activator 1) 5, 36.5kDa                           |
| <a href="#">Details</a> | 384 | 57 | hsa-miR-125a-5p | <a href="#">ZNF704</a>       | zinc finger protein 704                                                 |
| <a href="#">Details</a> | 385 | 57 | hsa-miR-125a-5p | <a href="#">MAP3K10</a>      | mitogen-activated protein kinase kinase kinase 10                       |
| <a href="#">Details</a> | 386 | 57 | hsa-miR-125a-5p | <a href="#">ARSI</a>         | arylsulfatase family, member I                                          |
| <a href="#">Details</a> | 387 | 57 | hsa-miR-125a-5p | <a href="#">KLRC2</a>        | killer cell lectin-like receptor subfamily C, member 2                  |
| <a href="#">Details</a> | 388 | 57 | hsa-miR-125a-5p | <a href="#">TXNRD1</a>       | thioredoxin reductase 1                                                 |
| <a href="#">Details</a> | 389 | 56 | hsa-miR-125a-5p | <a href="#">SMG1</a>         | SMG1 phosphatidylinositol 3-kinase-related kinase                       |
| <a href="#">Details</a> | 390 | 56 | hsa-miR-125a-5p | <a href="#">SORB</a>         | sorbitol dehydrogenase                                                  |
| <a href="#">Details</a> | 391 | 56 | hsa-miR-125a-5p | <a href="#">KCNH7</a>        | potassium voltage-gated channel, subfamily H (eag-related), member 7    |
| <a href="#">Details</a> | 392 | 56 | hsa-miR-125a-5p | <a href="#">KRTAP5-8</a>     | keratin associated protein 5-8                                          |
| <a href="#">Details</a> | 393 | 56 | hsa-miR-125a-5p | <a href="#">KPNA6</a>        | karyopherin alpha 6 (importin alpha 7)                                  |
| <a href="#">Details</a> | 394 | 56 | hsa-miR-125a-5p | <a href="#">ZC3H12B</a>      | zinc finger CCCH-type containing 12B                                    |
| <a href="#">Details</a> | 395 | 56 | hsa-miR-125a-5p | <a href="#">MLF2</a>         | myeloid leukemia factor 2                                               |
| <a href="#">Details</a> | 396 | 56 | hsa-miR-125a-5p | <a href="#">SPRTN</a>        | SprT-like N-terminal domain                                             |
| <a href="#">Details</a> | 397 | 56 | hsa-miR-125a-5p | <a href="#">LRRC8B</a>       | leucine rich repeat containing 8 family, member B                       |
| <a href="#">Details</a> | 398 | 56 | hsa-miR-125a-5p | <a href="#">RASGRF2</a>      | Ras protein-specific guanine nucleotide-releasing factor 2              |
| <a href="#">Details</a> | 399 | 56 | hsa-miR-125a-5p | <a href="#">MTFP1</a>        | mitochondrial fission process 1                                         |
| <a href="#">Details</a> | 400 | 56 | hsa-miR-125a-5p | <a href="#">SLC26A6</a>      | solute carrier family 26 (anion exchanger), member 6                    |
| <a href="#">Details</a> | 401 | 56 | hsa-miR-125a-5p | <a href="#">EAF1</a>         | ELL associated factor 1                                                 |
| <a href="#">Details</a> | 402 | 56 | hsa-miR-125a-5p | <a href="#">GRB10</a>        | growth factor receptor-bound protein 10                                 |
| <a href="#">Details</a> | 403 | 55 | hsa-miR-125a-5p | <a href="#">MBD1</a>         | methyl-CpG binding domain protein 1                                     |
| <a href="#">Details</a> | 404 | 55 | hsa-miR-125a-5p | <a href="#">GRIP2</a>        | glutamate receptor interacting protein 2                                |
| <a href="#">Details</a> | 405 | 55 | hsa-miR-125a-5p | <a href="#">PSMB8</a>        | proteasome (prosome, macropain) subunit, beta type, 8                   |

|                         |     |    |                 |                              |                                                                                  |
|-------------------------|-----|----|-----------------|------------------------------|----------------------------------------------------------------------------------|
| <a href="#">Details</a> | 406 | 55 | hsa-miR-125a-5p | <a href="#">P2RX4</a>        | purinergic receptor P2X, ligand-gated ion channel, 4                             |
| <a href="#">Details</a> | 407 | 55 | hsa-miR-125a-5p | <a href="#">TADA2B</a>       | transcriptional adaptor 2B                                                       |
| <a href="#">Details</a> | 408 | 55 | hsa-miR-125a-5p | <a href="#">LNPEP</a>        | leucyl/cystinyl aminopeptidase                                                   |
| <a href="#">Details</a> | 409 | 55 | hsa-miR-125a-5p | <a href="#">TMEM180</a>      | transmembrane protein 180                                                        |
| <a href="#">Details</a> | 410 | 55 | hsa-miR-125a-5p | <a href="#">STX17</a>        | syntaxin 17                                                                      |
| <a href="#">Details</a> | 411 | 55 | hsa-miR-125a-5p | <a href="#">UBTD1</a>        | ubiquitin domain containing 1                                                    |
| <a href="#">Details</a> | 412 | 55 | hsa-miR-125a-5p | <a href="#">TRIB1</a>        | tribbles pseudokinase 1                                                          |
| <a href="#">Details</a> | 413 | 55 | hsa-miR-125a-5p | <a href="#">SMG5</a>         | SMG5 nonsense mediated mRNA decay factor                                         |
| <a href="#">Details</a> | 414 | 55 | hsa-miR-125a-5p | <a href="#">SLC6A17</a>      | solute carrier family 6 (neutral amino acid transporter), member 17              |
| <a href="#">Details</a> | 415 | 55 | hsa-miR-125a-5p | <a href="#">UBE2J1</a>       | ubiquitin-conjugating enzyme E2, J1                                              |
| <a href="#">Details</a> | 416 | 54 | hsa-miR-125a-5p | <a href="#">PRRC1</a>        | proline-rich coiled-coil 1                                                       |
| <a href="#">Details</a> | 417 | 54 | hsa-miR-125a-5p | <a href="#">ARMC7</a>        | armadillo repeat containing 7                                                    |
| <a href="#">Details</a> | 418 | 54 | hsa-miR-125a-5p | <a href="#">STC1</a>         | stanniocalcin 1                                                                  |
| <a href="#">Details</a> | 419 | 54 | hsa-miR-125a-5p | <a href="#">ZNF578</a>       | zinc finger protein 578                                                          |
| <a href="#">Details</a> | 420 | 54 | hsa-miR-125a-5p | <a href="#">FUT4</a>         | fucosyltransferase 4 (alpha (1,3) fucosyltransferase, myeloid-specific)          |
| <a href="#">Details</a> | 421 | 54 | hsa-miR-125a-5p | <a href="#">TNFAIP8L1</a>    | tumor necrosis factor, alpha-induced protein 8-like 1                            |
| <a href="#">Details</a> | 422 | 54 | hsa-miR-125a-5p | <a href="#">CDH5</a>         | cadherin 5, type 2 (vascular endothelium)                                        |
| <a href="#">Details</a> | 423 | 54 | hsa-miR-125a-5p | <a href="#">SLC7A1</a>       | solute carrier family 7 (cationic amino acid transporter, y+ system), member 1   |
| <a href="#">Details</a> | 424 | 54 | hsa-miR-125a-5p | <a href="#">CARS2</a>        | cysteinyl-tRNA synthetase 2, mitochondrial (putative)                            |
| <a href="#">Details</a> | 425 | 54 | hsa-miR-125a-5p | <a href="#">ATXN1</a>        | ataxin 1                                                                         |
| <a href="#">Details</a> | 426 | 54 | hsa-miR-125a-5p | <a href="#">FBXO10</a>       | F-box protein 10                                                                 |
| <a href="#">Details</a> | 427 | 54 | hsa-miR-125a-5p | <a href="#">EIF5A2</a>       | eukaryotic translation initiation factor 5A2                                     |
| <a href="#">Details</a> | 428 | 54 | hsa-miR-125a-5p | <a href="#">MMP15</a>        | matrix metalloproteinase 15 (membrane-inserted)                                  |
| <a href="#">Details</a> | 429 | 54 | hsa-miR-125a-5p | <a href="#">SPEG</a>         | SPEG complex locus                                                               |
| <a href="#">Details</a> | 430 | 53 | hsa-miR-125a-5p | <a href="#">LOC102723489</a> | putative uncharacterized protein encoded by LINC00205-like                       |
| <a href="#">Details</a> | 431 | 53 | hsa-miR-125a-5p | <a href="#">NAIF1</a>        | nuclear apoptosis inducing factor 1                                              |
| <a href="#">Details</a> | 432 | 53 | hsa-miR-125a-5p | <a href="#">EDEM1</a>        | ER degradation enhancer, mannosidase alpha-like 1                                |
| <a href="#">Details</a> | 433 | 53 | hsa-miR-125a-5p | <a href="#">ATP5G2</a>       | ATP synthase, H+ transporting, mitochondrial Fo complex, subunit C2 (subunit 9)  |
| <a href="#">Details</a> | 434 | 53 | hsa-miR-125a-5p | <a href="#">SIRT5</a>        | sirtuin 5                                                                        |
| <a href="#">Details</a> | 435 | 53 | hsa-miR-125a-5p | <a href="#">TGOLN2</a>       | trans-golgi network protein 2                                                    |
| <a href="#">Details</a> | 436 | 53 | hsa-miR-125a-5p | <a href="#">KCNK7</a>        | potassium channel, subfamily K, member 7                                         |
| <a href="#">Details</a> | 437 | 53 | hsa-miR-125a-5p | <a href="#">PCSK7</a>        | proprotein convertase subtilisin/kexin type 7                                    |
| <a href="#">Details</a> | 438 | 53 | hsa-miR-125a-5p | <a href="#">SLC46A1</a>      | solute carrier family 46 (folate transporter), member 1                          |
| <a href="#">Details</a> | 439 | 53 | hsa-miR-125a-5p | <a href="#">SLC45A3</a>      | solute carrier family 45, member 3                                               |
| <a href="#">Details</a> | 440 | 53 | hsa-miR-125a-5p | <a href="#">ZBTB7A</a>       | zinc finger and BTB domain containing 7A                                         |
| <a href="#">Details</a> | 441 | 53 | hsa-miR-125a-5p | <a href="#">CPEB3</a>        | cytoplasmic polyadenylation element binding protein 3                            |
| <a href="#">Details</a> | 442 | 53 | hsa-miR-125a-5p | <a href="#">PMM2</a>         | phosphomannomutase 2                                                             |
| <a href="#">Details</a> | 443 | 52 | hsa-miR-125a-5p | <a href="#">ARSD</a>         | arylsulfatase D                                                                  |
| <a href="#">Details</a> | 444 | 52 | hsa-miR-125a-5p | <a href="#">STAT3</a>        | signal transducer and activator of transcription 3 (acute-phase response factor) |
| <a href="#">Details</a> | 445 | 52 | hsa-miR-125a-5p | <a href="#">FAM134C</a>      | family with sequence similarity 134,                                             |

|                         |     |    |                 |                          |                                                                                    |
|-------------------------|-----|----|-----------------|--------------------------|------------------------------------------------------------------------------------|
|                         |     |    |                 |                          | member C                                                                           |
| <a href="#">Details</a> | 446 | 52 | hsa-miR-125a-5p | <a href="#">LEPROT</a>   | leptin receptor overlapping transcript                                             |
| <a href="#">Details</a> | 447 | 52 | hsa-miR-125a-5p | <a href="#">IFFO1</a>    | intermediate filament family orphan 1                                              |
| <a href="#">Details</a> | 448 | 52 | hsa-miR-125a-5p | <a href="#">MAPKAPK2</a> | mitogen-activated protein kinase-activated protein kinase 2                        |
| <a href="#">Details</a> | 449 | 52 | hsa-miR-125a-5p | <a href="#">PADI2</a>    | peptidyl arginine deiminase, type II                                               |
| <a href="#">Details</a> | 450 | 52 | hsa-miR-125a-5p | <a href="#">MAP2K7</a>   | mitogen-activated protein kinase kinase 7                                          |
| <a href="#">Details</a> | 451 | 51 | hsa-miR-125a-5p | <a href="#">BSN</a>      | bassoon presynaptic cytomatrix protein                                             |
| <a href="#">Details</a> | 452 | 51 | hsa-miR-125a-5p | <a href="#">ZBTB47</a>   | zinc finger and BTB domain containing 47                                           |
| <a href="#">Details</a> | 453 | 51 | hsa-miR-125a-5p | <a href="#">PDIA3</a>    | protein disulfide isomerase family A, member 3                                     |
| <a href="#">Details</a> | 454 | 51 | hsa-miR-125a-5p | <a href="#">RNF144B</a>  | ring finger protein 144B                                                           |
| <a href="#">Details</a> | 455 | 51 | hsa-miR-125a-5p | <a href="#">FAM132B</a>  | family with sequence similarity 132, member B                                      |
| <a href="#">Details</a> | 456 | 51 | hsa-miR-125a-5p | <a href="#">MKNK2</a>    | MAP kinase interacting serine/threonine kinase 2                                   |
| <a href="#">Details</a> | 457 | 51 | hsa-miR-125a-5p | <a href="#">ABCC5</a>    | ATP-binding cassette, sub-family C (CFTR/MRP), member 5                            |
| <a href="#">Details</a> | 458 | 51 | hsa-miR-125a-5p | <a href="#">BCAN</a>     | brevican                                                                           |
| <a href="#">Details</a> | 459 | 51 | hsa-miR-125a-5p | <a href="#">NAA60</a>    | N(alpha)-acetyltransferase 60, NatF catalytic subunit                              |
| <a href="#">Details</a> | 460 | 51 | hsa-miR-125a-5p | <a href="#">CYTH1</a>    | cytohesin 1                                                                        |
| <a href="#">Details</a> | 461 | 51 | hsa-miR-125a-5p | <a href="#">TMEM120B</a> | transmembrane protein 120B                                                         |
| <a href="#">Details</a> | 462 | 51 | hsa-miR-125a-5p | <a href="#">CASP2</a>    | caspase 2, apoptosis-related cysteine peptidase                                    |
| <a href="#">Details</a> | 463 | 50 | hsa-miR-125a-5p | <a href="#">SLC7A6</a>   | solute carrier family 7 (amino acid transporter light chain, y+L system), member 6 |
| <a href="#">Details</a> | 464 | 50 | hsa-miR-125a-5p | <a href="#">NBPF9</a>    | neuroblastoma breakpoint family, member 9                                          |
| <a href="#">Details</a> | 465 | 50 | hsa-miR-125a-5p | <a href="#">NCOR2</a>    | nuclear receptor corepressor 2                                                     |
| <a href="#">Details</a> | 466 | 50 | hsa-miR-125a-5p | <a href="#">WDR92</a>    | WD repeat domain 92                                                                |
| <a href="#">Details</a> | 467 | 50 | hsa-miR-125a-5p | <a href="#">FAM107B</a>  | family with sequence similarity 107, member B                                      |
| <a href="#">Details</a> | 468 | 50 | hsa-miR-125a-5p | <a href="#">PHC2</a>     | polyhomeotic homolog 2 (Drosophila)                                                |
| <a href="#">Details</a> | 469 | 50 | hsa-miR-125a-5p | <a href="#">SOGA1</a>    | suppressor of glucose, autophagy associated 1                                      |
| <a href="#">Details</a> | 470 | 50 | hsa-miR-125a-5p | <a href="#">NBPF19</a>   | neuroblastoma breakpoint family, member 19                                         |
| <a href="#">Details</a> | 471 | 50 | hsa-miR-125a-5p | <a href="#">BMPR1B</a>   | bone morphogenetic protein receptor, type IB                                       |
| <a href="#">Details</a> | 472 | 50 | hsa-miR-125a-5p | <a href="#">LIMD2</a>    | LIM domain containing 2                                                            |
| <a href="#">Details</a> | 473 | 50 | hsa-miR-125a-5p | <a href="#">PPP2R5C</a>  | protein phosphatase 2, regulatory subunit B', gamma                                |
| <a href="#">Details</a> | 474 | 50 | hsa-miR-125a-5p | <a href="#">SCN4B</a>    | sodium channel, voltage-gated, type IV, beta subunit                               |
| <a href="#">Details</a> | 475 | 50 | hsa-miR-125a-5p | <a href="#">PIIF</a>     | peptidylprolyl isomerase F                                                         |
| <a href="#">Details</a> | 476 | 50 | hsa-miR-125a-5p | <a href="#">SEC14L2</a>  | SEC14-like 2 (S. cerevisiae)                                                       |
| <a href="#">Details</a> | 477 | 50 | hsa-miR-125a-5p | <a href="#">SERTAD3</a>  | SERTA domain containing 3                                                          |
| <a href="#">Details</a> | 478 | 50 | hsa-miR-125a-5p | <a href="#">COPS7B</a>   | COP9 signalosome subunit 7B                                                        |
| <a href="#">Details</a> | 479 | 50 | hsa-miR-125a-5p | <a href="#">ACPP</a>     | acid phosphatase, prostate                                                         |
