# Supplementary material for: Reduced miR-125a-5p level in non-small-cell lung cancer is associated with tumour progression
Source: PubMed Central journal article supplement (PMC6223209; doi:10.1098/rsob.180118), 2018-10-10
Supplement: rsob180118supp4.pdf [file rsob180118supp4.pdf]

**Human | miR-125-5p**

927 transcripts with conserved sites, containing a total of **1034** conserved sites and **448** poorly conserved sites.

Please note that these predicted targets include some false positives. [\[Read more\]](#)

Genes with only poorly conserved sites are not shown. [\[View top predicted targets, irrespective of site conservation\]](#)

[Table sorted by cumulative weighted context++ score](#) [\[Sort table by aggregate P<sub>CT</sub>\]](#)

The table shows at most one transcript per gene, selected for being the most prevalent, based on 3P-seq tags (or the one with the longest 3' UTR, in case of a tie). [\[Download table\]](#)

| Target gene | Representative transcript | Gene name                                                         | Number of 3P-seq tags supporting UTR + 5 | Link to sites in UTRs        | Conserved sites |      |         | Poorly co |       |     |
|-------------|---------------------------|-------------------------------------------------------------------|------------------------------------------|------------------------------|-----------------|------|---------|-----------|-------|-----|
|             |                           |                                                                   |                                          |                              | total           | 8mer | 7mer-m8 | 7mer-A1   | total | 8me |
| FAM169B     | ENST00000558256.1         | family with sequence similarity 169, member B                     | 5                                        | <a href="#">Sites in UTR</a> | 2               | 1    | 1       | 0         | 1     | 1   |
| DRAM2       | ENST00000286692.4         | DNA-damage regulated autophagy modulator 2                        | 184                                      | <a href="#">Sites in UTR</a> | 1               | 1    | 0       | 0         | 0     | 0   |
| GCNT1       | ENST00000376730.4         | glucosaminyl (N-acetyl) transferase 1, core 2                     | 93                                       | <a href="#">Sites in UTR</a> | 2               | 2    | 0       | 0         | 0     | 0   |
| RFXANK      | ENST00000353145.1         | regulatory factor X-associated ankyrin-containing protein         | 2548                                     | <a href="#">Sites in UTR</a> | 1               | 1    | 0       | 0         | 0     | 0   |
| TRIM71      | ENST00000383763.5         | tripartite motif containing 71, E3 ubiquitin protein ligase       | 67                                       | <a href="#">Sites in UTR</a> | 2               | 1    | 0       | 1         | 2     | 1   |
| NLR5        | ENST00000436936.1         | NLR family, CARD domain containing 5                              | 47                                       | <a href="#">Sites in UTR</a> | 1               | 1    | 0       | 0         | 2     | 1   |
| BAK1        | ENST00000442998.2         | BCL2-antagonist/killer 1                                          | 15                                       | <a href="#">Sites in UTR</a> | 1               | 1    | 0       | 0         | 2     | 0   |
| SWSAP1      | ENST00000312423.2         | SWIM-type zinc finger 7 associated protein 1                      | 55                                       | <a href="#">Sites in UTR</a> | 1               | 1    | 0       | 0         | 0     | 0   |
| NPL         | ENST00000367553.1         | N-acetylneuraminate pyruvate lyase (dihydrodipicolinate synthase) | 19                                       | <a href="#">Sites in UTR</a> | 1               | 1    | 0       | 0         | 0     | 0   |
| C19orf54    | ENST00000470681.1         | chromosome 19 open reading frame 54                               | 18                                       | <a href="#">Sites in UTR</a> | 1               | 1    | 0       | 0         | 1     | 0   |
| BIN2        | ENST00000452142.2         | bridging integrator 2                                             | 5                                        | <a href="#">Sites in UTR</a> | 1               | 1    | 0       | 0         | 0     | 0   |
| TSNARE1     | ENST00000519651.1         | t-SNARE domain containing 1                                       | 11                                       | <a href="#">Sites in UTR</a> | 2               | 2    | 0       | 0         | 0     | 0   |
| RAB3D       | ENST00000222120.3         | RAB3D, member RAS oncogene family                                 | 111                                      | <a href="#">Sites in UTR</a> | 2               | 0    | 1       | 1         | 1     | 1   |
| ARID3B      | ENST00000346246.5         | AT rich interactive domain 3B (BRIGHT-like)                       | 11                                       | <a href="#">Sites in UTR</a> | 3               | 1    | 1       | 1         | 3     | 0   |
| STARD13     | ENST00000336934.5         | StAR-related lipid transfer (START) domain containing 13          | 314                                      | <a href="#">Sites in UTR</a> | 2               | 1    | 0       | 1         | 2     | 1   |
| C19orf38    | ENST00000397820.4         | chromosome 19 open reading frame 38                               | 18                                       | <a href="#">Sites in UTR</a> | 1               | 1    | 0       | 0         | 0     | 0   |
| ACHE        | ENST00000302913.4         | acetylcholinesterase                                              | 14                                       | <a href="#">Sites in UTR</a> | 2               | 2    | 0       | 0         | 0     | 0   |
| SLC25A35    | ENST00000577745.1         | solute carrier family 25, member 35                               | 376                                      | <a href="#">Sites in UTR</a> | 2               | 0    | 2       | 0         | 0     | 0   |
| SERTAD3     | ENST00000392028.4         | SERTA domain containing 3                                         | 765                                      | <a href="#">Sites in UTR</a> | 1               | 1    | 0       | 0         | 0     | 0   |
| SSTR3       | ENST00000328544.3         | somatostatin receptor 3                                           | 5                                        | <a href="#">Sites in UTR</a> | 2               | 2    | 0       | 0         | 1     | 0   |
| ZFP62       | ENST00000512132.1         | ZFP62 zinc finger protein                                         | 170                                      | <a href="#">Sites in UTR</a> | 3               | 0    | 0       | 3         | 0     | 0   |
| KLF13       | ENST00000307145.3         | Kruppel-like factor 13                                            | 5                                        | <a href="#">Sites in UTR</a> | 1               | 1    | 0       | 0         | 2     | 0   |
| RIN3        | ENST00000216487.7         | Ras and Rab interactor 3                                          | 38                                       | <a href="#">Sites in UTR</a> | 1               | 0    | 1       | 0         | 2     | 1   |
| KCNIP3      | ENST00000295225.5         | Kv channel interacting protein 3, calsenilin                      | 555                                      | <a href="#">Sites in UTR</a> | 1               | 1    | 0       | 0         | 2     | 0   |
| RAD54L2     | ENST00000409535.2         | RAD54-like 2 (S. cerevisiae)                                      | 215                                      | <a href="#">Sites in UTR</a> | 1               | 0    | 1       | 0         | 3     | 0   |
| TOR2A       | ENST00000458505.3         | torsin family 2, member A                                         | 75                                       | <a href="#">Sites in UTR</a> | 1               | 1    | 0       | 0         | 0     | 0   |
| PPP1R12B    | ENST00000608999.1         | protein phosphatase 1, regulatory subunit 12B                     | 18                                       | <a href="#">Sites in UTR</a> | 1               | 1    | 0       | 0         | 4     | 0   |
| TNFSF4      | ENST00000367718.1         | tumor necrosis factor (ligand) superfamily, member 4              | 85                                       | <a href="#">Sites in UTR</a> | 2               | 1    | 1       | 0         | 0     | 0   |
| VPS4B       | ENST00000238497.5         | vacuolar protein sorting 4 homolog B (S. cerevisiae)              | 180                                      | <a href="#">Sites in UTR</a> | 1               | 1    | 0       | 0         | 1     | 0   |
| NEU1        | ENST00000375631.4         | sialidase 1 (lysosomal sialidase)                                 | 6000                                     | <a href="#">Sites in UTR</a> | 1               | 1    | 0       | 0         | 0     | 0   |
| OSBPL9      | ENST00000371710.3         | oxysterol binding protein-like 9                                  | 4836                                     | <a href="#">Sites in UTR</a> | 1               | 1    | 0       | 0         | 0     | 0   |
| LFNG        | ENST00000402045.1         | LFNG O-fucosylpeptide 3-beta-N-acetylglucosaminyltransferase      | 346                                      | <a href="#">Sites in UTR</a> | 1               | 1    | 0       | 0         | 0     | 0   |
| SLC26A6     | ENST00000420764.2         | solute carrier family 26 (anion exchanger), member 6              | 529                                      | <a href="#">Sites in UTR</a> | 1               | 1    | 0       | 0         | 0     | 0   |
| NECAB3      | ENST00000246190.6         | N-terminal EF-hand calcium binding protein 3                      | 154                                      | <a href="#">Sites in UTR</a> | 2               | 1    | 1       | 0         | 1     | 0   |
| EIF1AD      | ENST00000526451.1         | eukaryotic translation initiation factor 1A domain containing     | 359                                      | <a href="#">Sites in UTR</a> | 1               | 1    | 0       | 0         | 0     | 0   |
| TTPA        | ENST00000260116.4         | tocopherol (alpha) transfer protein                               | 5                                        | <a href="#">Sites in UTR</a> | 1               | 1    | 0       | 0         | 0     | 0   |
| FBXW4       | ENST00000331272.7         | F-box and WD repeat domain containing 4                           | 5                                        | <a href="#">Sites in UTR</a> | 1               | 1    | 0       | 0         | 0     | 0   |
| C1orf210    | ENST00000523677.1         | chromosome 1 open reading frame 210                               | 43                                       | <a href="#">Sites in UTR</a> | 1               | 1    | 0       | 0         | 0     | 0   |
| DOCK3       | ENST00000266037.9         | dedicator of cytokinesis 3                                        | 47                                       | <a href="#">Sites in UTR</a> | 3               | 0    | 1       | 2         | 0     | 0   |
| ENTPD1      | ENST00000371207.3         | ectonucleoside triphosphate diphosphohydrolase 1                  | 15                                       | <a href="#">Sites in UTR</a> | 1               | 0    | 1       | 0         | 2     | 0   |
| KIAA1841    | ENST00000402291.1         | KIAA1841                                                          | 62                                       | <a href="#">Sites in UTR</a> | 1               | 1    | 0       | 0         | 1     | 0   |
| ZNF460      | ENST00000360338.3         | zinc finger protein 460                                           | 164                                      | <a href="#">Sites in UTR</a> | 1               | 1    | 0       | 0         | 3     | 1   |
| C6orf47     | ENST00000375911.1         | chromosome 6 open reading frame 47                                | 38                                       | <a href="#">Sites in UTR</a> | 1               | 1    | 0       | 0         | 0     | 0   |

|           |                   |                                                                                                                  |      |                              |   |   |   |   |   |   |
|-----------|-------------------|------------------------------------------------------------------------------------------------------------------|------|------------------------------|---|---|---|---|---|---|
| PSMB8     | ENST00000395339.3 | proteasome (prosome, macropain) subunit, beta type, 8                                                            | 18   | <a href="#">Sites in UTR</a> | 1 | 1 | 0 | 0 | 0 | 0 |
| DUS1L     | ENST00000306796.5 | dihydrouridine synthase 1-like (S. cerevisiae)                                                                   | 36   | <a href="#">Sites in UTR</a> | 1 | 1 | 0 | 0 | 0 | 0 |
| CCNJ      | ENST00000265992.5 | cyclin J                                                                                                         | 5    | <a href="#">Sites in UTR</a> | 1 | 1 | 0 | 0 | 0 | 0 |
| IRF4      | ENST00000380956.4 | interferon regulatory factor 4                                                                                   | 10   | <a href="#">Sites in UTR</a> | 1 | 1 | 0 | 0 | 1 | 0 |
| BMF       | ENST00000220446.4 | Bcl2 modifying factor                                                                                            | 179  | <a href="#">Sites in UTR</a> | 2 | 1 | 1 | 0 | 1 | 0 |
| CDH5      | ENST00000341529.3 | cadherin 5, type 2 (vascular endothelium)                                                                        | 8    | <a href="#">Sites in UTR</a> | 2 | 1 | 0 | 1 | 0 | 0 |
| PCTP      | ENST00000576183.1 | phosphatidylcholine transfer protein                                                                             | 476  | <a href="#">Sites in UTR</a> | 1 | 1 | 0 | 0 | 0 | 0 |
| TMEM168   | ENST00000312814.6 | transmembrane protein 168                                                                                        | 195  | <a href="#">Sites in UTR</a> | 2 | 0 | 1 | 1 | 0 | 0 |
| PLEKHA8   | ENST00000449726.1 | pleckstrin homology domain containing, family A (phosphoinositide binding specific) member 8                     | 661  | <a href="#">Sites in UTR</a> | 2 | 0 | 1 | 1 | 0 | 0 |
| SLC39A9   | ENST00000031146.4 | solute carrier family 39, member 9                                                                               | 824  | <a href="#">Sites in UTR</a> | 1 | 1 | 0 | 0 | 0 | 0 |
| OLFML2A   | ENST00000288815.5 | olfactomedin-like 2A                                                                                             | 155  | <a href="#">Sites in UTR</a> | 2 | 1 | 1 | 0 | 1 | 0 |
| HDDC3     | ENST00000559898.1 | HD domain containing 3                                                                                           | 1127 | <a href="#">Sites in UTR</a> | 1 | 1 | 0 | 0 | 1 | 0 |
| TSEN54    | ENST00000333213.6 | TSEN54 tRNA splicing endonuclease subunit                                                                        | 81   | <a href="#">Sites in UTR</a> | 1 | 1 | 0 | 0 | 0 | 0 |
| TIFAB     | ENST00000537858.1 | TRAF-interacting protein with forkhead-associated domain, family member B                                        | 5    | <a href="#">Sites in UTR</a> | 1 | 0 | 1 | 0 | 3 | 2 |
| MAP2K7    | ENST00000397981.3 | mitogen-activated protein kinase kinase 7                                                                        | 164  | <a href="#">Sites in UTR</a> | 1 | 0 | 1 | 0 | 3 | 0 |
| ABTB1     | ENST00000393363.3 | ankyrin repeat and BTB (POZ) domain containing 1                                                                 | 180  | <a href="#">Sites in UTR</a> | 1 | 1 | 0 | 0 | 0 | 0 |
| MAP3K10   | ENST00000253055.3 | mitogen-activated protein kinase kinase kinase 10                                                                | 178  | <a href="#">Sites in UTR</a> | 1 | 1 | 0 | 0 | 0 | 0 |
| APOC4     | ENST00000419266.2 | apolipoprotein C-IV                                                                                              | 2245 | <a href="#">Sites in UTR</a> | 1 | 1 | 0 | 0 | 0 | 0 |
| SAMD14    | ENST00000330175.4 | sterile alpha motif domain containing 14                                                                         | 88   | <a href="#">Sites in UTR</a> | 1 | 0 | 1 | 0 | 4 | 0 |
| FAM213A   | ENST00000372187.5 | family with sequence similarity 213, member A                                                                    | 482  | <a href="#">Sites in UTR</a> | 1 | 1 | 0 | 0 | 1 | 1 |
| KHNYN     | ENST00000251343.5 | KH and NYN domain containing                                                                                     | 421  | <a href="#">Sites in UTR</a> | 1 | 0 | 1 | 0 | 1 | 0 |
| IL6R      | ENST00000344086.4 | interleukin 6 receptor                                                                                           | 13   | <a href="#">Sites in UTR</a> | 1 | 0 | 1 | 0 | 1 | 0 |
| NIPAL4    | ENST00000311946.7 | NIPA-like domain containing 4                                                                                    | 17   | <a href="#">Sites in UTR</a> | 1 | 1 | 0 | 0 | 1 | 0 |
| BAP1      | ENST00000460680.1 | BRCA1 associated protein-1 (ubiquitin carboxy-terminal hydrolase)                                                | 445  | <a href="#">Sites in UTR</a> | 2 | 1 | 1 | 0 | 1 | 0 |
| ABHD6     | ENST00000295962.4 | abhydrolase domain containing 6                                                                                  | 289  | <a href="#">Sites in UTR</a> | 1 | 1 | 0 | 0 | 0 | 0 |
| TNFAIP3   | ENST00000237289.4 | tumor necrosis factor, alpha-induced protein 3                                                                   | 150  | <a href="#">Sites in UTR</a> | 1 | 1 | 0 | 0 | 0 | 0 |
| SLITRK6   | ENST00000400286.2 | SLIT and NTRK-like family, member 6                                                                              | 5    | <a href="#">Sites in UTR</a> | 1 | 1 | 0 | 0 | 0 | 0 |
| HINFP     | ENST00000350777.2 | histone H4 transcription factor                                                                                  | 410  | <a href="#">Sites in UTR</a> | 1 | 1 | 0 | 0 | 0 | 0 |
| IER2      | ENST00000292433.3 | immediate early response 2                                                                                       | 81   | <a href="#">Sites in UTR</a> | 1 | 0 | 1 | 0 | 0 | 0 |
| MAVS      | ENST00000428216.2 | mitochondrial antiviral signaling protein                                                                        | 211  | <a href="#">Sites in UTR</a> | 1 | 1 | 0 | 0 | 3 | 1 |
| TSTA3     | ENST00000529064.1 | tissue specific transplantation antigen P35B                                                                     | 24   | <a href="#">Sites in UTR</a> | 1 | 1 | 0 | 0 | 0 | 0 |
| SEMA4D    | ENST00000450295.1 | sema domain, immunoglobulin domain (Ig), transmembrane domain (TM) and short cytoplasmic domain, (semaphorin) 4D | 76   | <a href="#">Sites in UTR</a> | 1 | 1 | 0 | 0 | 0 | 0 |
| KCTD15    | ENST00000284006.6 | potassium channel tetramerization domain containing 15                                                           | 2483 | <a href="#">Sites in UTR</a> | 1 | 1 | 0 | 0 | 5 | 2 |
| MTF1      | ENST00000373036.4 | metal-regulatory transcription factor 1                                                                          | 98   | <a href="#">Sites in UTR</a> | 1 | 0 | 1 | 0 | 3 | 0 |
| SH3TC2    | ENST00000502274.1 | SH3 domain and tetratricopeptide repeats 2                                                                       | 31   | <a href="#">Sites in UTR</a> | 1 | 1 | 0 | 0 | 9 | 0 |
| GJC1      | ENST00000426548.1 | gap junction protein, gamma 1, 45kDa                                                                             | 195  | <a href="#">Sites in UTR</a> | 3 | 0 | 2 | 1 | 0 | 0 |
| KCNK10    | ENST00000340700.5 | potassium channel, subfamily K, member 10                                                                        | 5    | <a href="#">Sites in UTR</a> | 2 | 1 | 1 | 0 | 0 | 0 |
| GMIP      | ENST00000203556.4 | GEM interacting protein                                                                                          | 9    | <a href="#">Sites in UTR</a> | 1 | 0 | 1 | 0 | 1 | 0 |
| PODXL     | ENST00000541194.1 | podocalyxin-like                                                                                                 | 2928 | <a href="#">Sites in UTR</a> | 2 | 1 | 1 | 0 | 1 | 0 |
| NR6A1     | ENST00000487099.2 | nuclear receptor subfamily 6, group A, member 1                                                                  | 1082 | <a href="#">Sites in UTR</a> | 1 | 1 | 0 | 0 | 2 | 1 |
| SLC25A15  | ENST00000338625.4 | solute carrier family 25 (mitochondrial carrier; ornithine transporter) member 15                                | 345  | <a href="#">Sites in UTR</a> | 1 | 0 | 1 | 0 | 0 | 0 |
| LRRC10B   | ENST00000378075.2 | leucine rich repeat containing 10B                                                                               | 5    | <a href="#">Sites in UTR</a> | 1 | 1 | 0 | 0 | 0 | 0 |
| LIN28B    | ENST00000345080.4 | lin-28 homolog B (C. elegans)                                                                                    | 118  | <a href="#">Sites in UTR</a> | 1 | 1 | 0 | 0 | 0 | 0 |
| UBE2G1    | ENST00000396981.2 | ubiquitin-conjugating enzyme E2G 1                                                                               | 5620 | <a href="#">Sites in UTR</a> | 1 | 1 | 0 | 0 | 0 | 0 |
| SBNO1     | ENST00000420886.2 | strawberry notch homolog 1 (Drosophila)                                                                          | 87   | <a href="#">Sites in UTR</a> | 2 | 0 | 1 | 1 | 0 | 0 |
| PSTPIP2   | ENST00000409746.5 | proline-serine-threonine phosphatase interacting protein 2                                                       | 215  | <a href="#">Sites in UTR</a> | 1 | 1 | 0 | 0 | 0 | 0 |
| RS1       | ENST00000379984.3 | retinoschisin 1                                                                                                  | 5    | <a href="#">Sites in UTR</a> | 1 | 0 | 1 | 0 | 2 | 0 |
| CGREF1    | ENST00000402394.1 | cell growth regulator with EF-hand domain 1                                                                      | 56   | <a href="#">Sites in UTR</a> | 1 | 1 | 0 | 0 | 1 | 0 |
| ATP10D    | ENST00000273859.3 | ATPase, class V, type 10D                                                                                        | 440  | <a href="#">Sites in UTR</a> | 1 | 0 | 1 | 0 | 1 | 0 |
| MAPK12    | ENST00000395780.1 | mitogen-activated protein kinase 12                                                                              | 206  | <a href="#">Sites in UTR</a> | 1 | 1 | 0 | 0 | 0 | 0 |
| C17orf103 | ENST00000399011.2 | chromosome 17 open reading frame 103                                                                             | 54   | <a href="#">Sites in UTR</a> | 1 | 0 | 1 | 0 | 2 | 0 |
| SAMD10    | ENST00000369886.3 | sterile alpha motif domain containing 10                                                                         | 45   | <a href="#">Sites in UTR</a> | 1 | 1 | 0 | 0 | 0 | 0 |
| KCNS3     | ENST00000304101.4 | potassium voltage-gated channel, delayed-rectifier, subfamily S, member 3                                        | 344  | <a href="#">Sites in UTR</a> | 1 | 0 | 1 | 0 | 0 | 0 |
| ARID3A    | ENST00000263620.3 | AT rich interactive domain 3A (BRIGHT-like)                                                                      | 320  | <a href="#">Sites in UTR</a> | 4 | 1 | 2 | 1 | 0 | 0 |

|          |                   |                                                                    |      |              |   |   |   |   |   |   |
|----------|-------------------|--------------------------------------------------------------------|------|--------------|---|---|---|---|---|---|
| SYT2     | ENST00000367267.1 | synaptotagmin II                                                   | 5    | Sites in UTR | 1 | 0 | 1 | 0 | 3 | 1 |
| CDC42SE1 | ENST00000439374.2 | CDC42 small effector 1                                             | 231  | Sites in UTR | 1 | 1 | 0 | 0 | 0 | 0 |
| SCARB1   | ENST00000339570.5 | scavenger receptor class B, member 1                               | 186  | Sites in UTR | 1 | 1 | 0 | 0 | 0 | 0 |
| C17orf59 | ENST00000389017.4 | chromosome 17 open reading frame 59                                | 664  | Sites in UTR | 1 | 0 | 1 | 0 | 1 | 0 |
| CYP24A1  | ENST00000216862.3 | cytochrome P450, family 24, subfamily A, polypeptide 1             | 51   | Sites in UTR | 1 | 1 | 0 | 0 | 0 | 0 |
| FAM118A  | ENST00000216214.3 | family with sequence similarity 118, member A                      | 202  | Sites in UTR | 1 | 1 | 0 | 0 | 1 | 0 |
| BDH1     | ENST00000392378.2 | 3-hydroxybutyrate dehydrogenase, type 1                            | 39   | Sites in UTR | 1 | 0 | 1 | 0 | 1 | 0 |
| BLZF1    | ENST00000367808.3 | basic leucine zipper nuclear factor 1                              | 73   | Sites in UTR | 1 | 0 | 1 | 0 | 0 | 0 |
| SLC35A4  | ENST00000323146.3 | solute carrier family 35, member A4                                | 334  | Sites in UTR | 1 | 1 | 0 | 0 | 0 | 0 |
| KLHL6    | ENST00000341319.3 | kelch-like family member 6                                         | 5    | Sites in UTR | 1 | 1 | 0 | 0 | 1 | 0 |
| LBH      | ENST00000395323.3 | limb bud and heart development                                     | 1956 | Sites in UTR | 1 | 1 | 0 | 0 | 0 | 0 |
| ZSWIM5   | ENST00000359600.5 | zinc finger, SWIM-type containing 5                                | 31   | Sites in UTR | 1 | 1 | 0 | 0 | 0 | 0 |
| MEGF9    | ENST00000373930.3 | multiple EGF-like-domains 9                                        | 689  | Sites in UTR | 2 | 0 | 2 | 0 | 1 | 0 |
| DIS3L2   | ENST00000325385.7 | DIS3 mitotic control homolog (S. cerevisiae)-like 2                | 45   | Sites in UTR | 1 | 0 | 1 | 0 | 0 | 0 |
| CSNK2A1  | ENST00000349736.5 | casein kinase 2, alpha 1 polypeptide                               | 1927 | Sites in UTR | 1 | 0 | 1 | 0 | 2 | 0 |
| ABHD3    | ENST00000289119.2 | abhydrolase domain containing 3                                    | 228  | Sites in UTR | 1 | 0 | 1 | 0 | 0 | 0 |
| MAN1B1   | ENST00000371589.4 | mannosidase, alpha, class 1B, member 1                             | 604  | Sites in UTR | 1 | 1 | 0 | 0 | 0 | 0 |
| TMEM135  | ENST00000340353.7 | transmembrane protein 135                                          | 963  | Sites in UTR | 2 | 0 | 0 | 2 | 3 | 2 |
| SGPL1    | ENST00000373202.3 | sphingosine-1-phosphate lyase 1                                    | 105  | Sites in UTR | 2 | 1 | 1 | 0 | 0 | 0 |
| SYVN1    | ENST00000294256.8 | synovial apoptosis inhibitor 1, synoviolin                         | 95   | Sites in UTR | 1 | 1 | 0 | 0 | 0 | 0 |
| SCN2B    | ENST00000278947.5 | sodium channel, voltage-gated, type II, beta subunit               | 5    | Sites in UTR | 1 | 1 | 0 | 0 | 1 | 0 |
| LIN28A   | ENST00000326279.6 | lin-28 homolog A (C. elegans)                                      | 5    | Sites in UTR | 1 | 1 | 0 | 0 | 0 | 0 |
| AQPEP    | ENST00000357872.4 | Aminopeptidase Q                                                   | 11   | Sites in UTR | 1 | 0 | 1 | 0 | 1 | 0 |
| MFHAS1   | ENST00000276282.6 | malignant fibrous histiocytoma amplified sequence 1                | 130  | Sites in UTR | 1 | 1 | 0 | 0 | 1 | 0 |
| NXF1     | ENST00000531709.2 | nuclear RNA export factor 1                                        | 1017 | Sites in UTR | 1 | 1 | 0 | 0 | 1 | 0 |
| TAZ      | ENST00000299328.5 | tafazzin                                                           | 1269 | Sites in UTR | 1 | 1 | 0 | 0 | 0 | 0 |
| MSI1     | ENST00000257552.2 | musashi RNA-binding protein 1                                      | 287  | Sites in UTR | 1 | 1 | 0 | 0 | 1 | 0 |
| ESRRA    | ENST00000405666.1 | estrogen-related receptor alpha                                    | 18   | Sites in UTR | 1 | 1 | 0 | 0 | 1 | 0 |
| GREB1L   | ENST00000580732.2 | growth regulation by estrogen in breast cancer-like                | 30   | Sites in UTR | 1 | 0 | 1 | 0 | 2 | 0 |
| VTCN1    | ENST00000359008.4 | V-set domain containing T cell activation inhibitor 1              | 5    | Sites in UTR | 1 | 1 | 0 | 0 | 1 | 0 |
| PPT1     | ENST00000433473.3 | palmitoyl-protein thioesterase 1                                   | 1961 | Sites in UTR | 1 | 1 | 0 | 0 | 0 | 0 |
| SUV420H2 | ENST00000255613.3 | suppressor of variegation 4-20 homolog 2 (Drosophila)              | 265  | Sites in UTR | 1 | 1 | 0 | 0 | 0 | 0 |
| KIAA1522 | ENST00000401073.2 | KIAA1522                                                           | 13   | Sites in UTR | 1 | 1 | 0 | 0 | 0 | 0 |
| SMEK1    | ENST00000554684.1 | SMEK homolog 1, suppressor of mek1 (Dictyostelium)                 | 713  | Sites in UTR | 2 | 1 | 0 | 1 | 0 | 0 |
| THEMIS2  | ENST00000373925.1 | thymocyte selection associated family member 2                     | 41   | Sites in UTR | 1 | 1 | 0 | 0 | 0 | 0 |
| MAP3K11  | ENST00000309100.3 | mitogen-activated protein kinase kinase kinase 11                  | 339  | Sites in UTR | 1 | 1 | 0 | 0 | 0 | 0 |
| ETV3     | ENST00000368192.4 | ets variant 3                                                      | 37   | Sites in UTR | 1 | 0 | 0 | 1 | 1 | 0 |
| VWC2     | ENST00000340652.4 | von Willebrand factor C domain containing 2                        | 5    | Sites in UTR | 1 | 0 | 1 | 0 | 2 | 1 |
| WARS     | ENST00000392882.2 | tryptophanyl-tRNA synthetase                                       | 1916 | Sites in UTR | 1 | 1 | 0 | 0 | 0 | 0 |
| LIPA     | ENST00000336233.5 | lipase A, lysosomal acid, cholesterol esterase                     | 1793 | Sites in UTR | 1 | 1 | 0 | 0 | 0 | 0 |
| TBC1D1   | ENST00000261439.4 | TBC1 (tre-2/USP6, BUB2, cdc16) domain family, member 1             | 150  | Sites in UTR | 1 | 1 | 0 | 0 | 2 | 0 |
| ZSWIM4   | ENST00000254323.2 | zinc finger, SWIM-type containing 4                                | 13   | Sites in UTR | 2 | 0 | 1 | 1 | 1 | 0 |
| DHX33    | ENST00000225296.3 | DEAH (Asp-Glu-Ala-His) box polypeptide 33                          | 724  | Sites in UTR | 1 | 1 | 0 | 0 | 1 | 0 |
| PRDM1    | ENST00000369089.3 | PR domain containing 1, with ZNF domain                            | 48   | Sites in UTR | 1 | 0 | 1 | 0 | 0 | 0 |
| PTPN18   | ENST00000175756.5 | protein tyrosine phosphatase, non-receptor type 18 (brain-derived) | 438  | Sites in UTR | 1 | 0 | 1 | 0 | 1 | 0 |
| XKRX     | ENST00000328526.5 | XK, Kell blood group complex subunit-related, X-linked             | 11   | Sites in UTR | 1 | 1 | 0 | 0 | 0 | 0 |
| KLHL31   | ENST00000370905.3 | kelch-like family member 31                                        | 16   | Sites in UTR | 1 | 1 | 0 | 0 | 1 | 0 |
| RUFY3    | ENST00000381006.3 | RUN and FYVE domain containing 3                                   | 162  | Sites in UTR | 1 | 1 | 0 | 0 | 0 | 0 |
| ST8SIA4  | ENST00000231461.5 | ST8 alpha-N-acetyl-neuraminide alpha-2,8-sialyltransferase 4       | 5    | Sites in UTR | 1 | 1 | 0 | 0 | 0 | 0 |
| ZFYVE1   | ENST00000318876.5 | zinc finger, FYVE domain containing 1                              | 5    | Sites in UTR | 1 | 0 | 1 | 0 | 1 | 0 |
| FAM131B  | ENST00000443739.2 | family with sequence similarity 131, member B                      | 5    | Sites in UTR | 2 | 0 | 2 | 0 | 0 | 0 |
| PRRC1    | ENST00000296666.8 | proline-rich coiled-coil 1                                         | 2351 | Sites in UTR | 1 | 0 | 1 | 0 | 1 | 0 |
| TYSND1   | ENST00000335494.5 | trypsin domain containing 1                                        | 35   | Sites in UTR | 1 | 1 | 0 | 0 | 0 | 0 |
| RABEP2   | ENST00000357573.6 | rabaptin, RAB GTPase binding effector protein 2                    | 5    | Sites in UTR | 1 | 1 | 0 | 0 | 0 | 0 |

|            |                   |                                                                                                              |      |              |   |   |   |   |   |   |
|------------|-------------------|--------------------------------------------------------------------------------------------------------------|------|--------------|---|---|---|---|---|---|
| GALNT14    | ENST00000324589.5 | UDP-N-acetyl-alpha-D-galactosamine:polypeptide N-acetylgalactosaminyltransferase 14 (GalNAc-T14)             | 5    | Sites in UTR | 1 | 1 | 0 | 0 | 0 | 0 |
| RPS6KA1    | ENST00000374168.2 | ribosomal protein S6 kinase, 90kDa, polypeptide 1                                                            | 1449 | Sites in UTR | 1 | 0 | 1 | 0 | 0 | 0 |
| TTC7A      | ENST00000319190.5 | tetratricopeptide repeat domain 7A                                                                           | 400  | Sites in UTR | 1 | 1 | 0 | 0 | 1 | 0 |
| RYBP       | ENST00000477973.2 | RING1 and YY1 binding protein                                                                                | 342  | Sites in UTR | 1 | 1 | 0 | 0 | 0 | 0 |
| ZSWIM6     | ENST00000252744.5 | zinc finger, SWIM-type containing 6                                                                          | 933  | Sites in UTR | 1 | 1 | 0 | 0 | 0 | 0 |
| GRB10      | ENST00000398812.2 | growth factor receptor-bound protein 10                                                                      | 1382 | Sites in UTR | 2 | 0 | 1 | 1 | 0 | 0 |
| MYT1       | ENST00000328439.1 | myelin transcription factor 1                                                                                | 12   | Sites in UTR | 1 | 1 | 0 | 0 | 0 | 0 |
| TMEM161B   | ENST00000506536.1 | transmembrane protein 161B                                                                                   | 14   | Sites in UTR | 1 | 0 | 1 | 0 | 0 | 0 |
| ZNF624     | ENST00000311331.7 | zinc finger protein 624                                                                                      | 167  | Sites in UTR | 1 | 1 | 0 | 0 | 0 | 0 |
| ENPEP      | ENST00000265162.5 | glutamyl aminopeptidase (aminopeptidase A)                                                                   | 10   | Sites in UTR | 1 | 1 | 0 | 0 | 0 | 0 |
| PDE7A      | ENST00000401827.3 | phosphodiesterase 7A                                                                                         | 84   | Sites in UTR | 1 | 0 | 1 | 0 | 1 | 0 |
| CORO2A     | ENST00000343933.5 | coronin, actin binding protein, 2A                                                                           | 493  | Sites in UTR | 1 | 1 | 0 | 0 | 0 | 0 |
| FOXD2      | ENST00000334793.5 | forkhead box D2                                                                                              | 118  | Sites in UTR | 1 | 1 | 0 | 0 | 1 | 0 |
| SUV39H1    | ENST00000376687.3 | suppressor of variegation 3-9 homolog 1 (Drosophila)                                                         | 499  | Sites in UTR | 1 | 1 | 0 | 0 | 0 | 0 |
| SLC46A3    | ENST00000266943.6 | solute carrier family 46, member 3                                                                           | 5    | Sites in UTR | 1 | 1 | 0 | 0 | 0 | 0 |
| PCGF6      | ENST00000337211.4 | polycomb group ring finger 6                                                                                 | 5    | Sites in UTR | 1 | 0 | 1 | 0 | 0 | 0 |
| VPS36      | ENST00000378060.4 | vacuolar protein sorting 36 homolog (S. cerevisiae)                                                          | 57   | Sites in UTR | 1 | 1 | 0 | 0 | 0 | 0 |
| IST1       | ENST00000329908.8 | increased sodium tolerance 1 homolog (yeast)                                                                 | 305  | Sites in UTR | 1 | 1 | 0 | 0 | 0 | 0 |
| RAPGEFL1   | ENST00000264644.6 | Rap guanine nucleotide exchange factor (GEF)-like 1                                                          | 20   | Sites in UTR | 1 | 1 | 0 | 0 | 0 | 0 |
| CACNB3     | ENST00000301050.2 | calcium channel, voltage-dependent, beta 3 subunit                                                           | 41   | Sites in UTR | 1 | 1 | 0 | 0 | 0 | 0 |
| SLC24A2    | ENST00000341998.2 | solute carrier family 24 (sodium/potassium/calcium exchanger), member 2                                      | 5    | Sites in UTR | 1 | 0 | 0 | 1 | 2 | 0 |
| EVA1A      | ENST00000393913.3 | eva-1 homolog A (C. elegans)                                                                                 | 45   | Sites in UTR | 1 | 1 | 0 | 0 | 0 | 0 |
| ORC2       | ENST00000234296.2 | origin recognition complex, subunit 2                                                                        | 381  | Sites in UTR | 1 | 1 | 0 | 0 | 0 | 0 |
| GGT7       | ENST00000336431.5 | gamma-glutamyltransferase 7                                                                                  | 16   | Sites in UTR | 1 | 0 | 1 | 0 | 1 | 0 |
| SH3BP5L    | ENST00000366472.5 | SH3-binding domain protein 5-like                                                                            | 379  | Sites in UTR | 1 | 1 | 0 | 0 | 2 | 0 |
| CEP85      | ENST00000252992.4 | centrosomal protein 85kDa                                                                                    | 471  | Sites in UTR | 2 | 0 | 2 | 0 | 0 | 0 |
| OGFR       | ENST00000290291.6 | opioid growth factor receptor                                                                                | 428  | Sites in UTR | 1 | 1 | 0 | 0 | 0 | 0 |
| EIF4EBP1   | ENST00000338825.4 | eukaryotic translation initiation factor 4E binding protein 1                                                | 121  | Sites in UTR | 1 | 0 | 1 | 0 | 3 | 0 |
| GK5        | ENST00000392993.2 | glycerol kinase 5 (putative)                                                                                 | 73   | Sites in UTR | 1 | 1 | 0 | 0 | 0 | 0 |
| DENND6A    | ENST00000311128.5 | DENN/MADD domain containing 6A                                                                               | 139  | Sites in UTR | 1 | 0 | 1 | 0 | 0 | 0 |
| SLC39A13   | ENST00000524928.1 | solute carrier family 39 (zinc transporter), member 13                                                       | 845  | Sites in UTR | 1 | 1 | 0 | 0 | 2 | 0 |
| C10orf105  | ENST00000441508.2 | chromosome 10 open reading frame 105                                                                         | 5    | Sites in UTR | 2 | 1 | 0 | 1 | 4 | 0 |
| KIAA1644   | ENST00000381176.4 | KIAA1644                                                                                                     | 10   | Sites in UTR | 1 | 0 | 1 | 0 | 1 | 0 |
| CYTH1      | ENST00000585509.1 | cytohesin 1                                                                                                  | 553  | Sites in UTR | 1 | 1 | 0 | 0 | 1 | 0 |
| SEPN1      | ENST00000361547.2 | selenoprotein N, 1                                                                                           | 104  | Sites in UTR | 1 | 1 | 0 | 0 | 1 | 0 |
| TP53INP1   | ENST00000448464.2 | tumor protein p53 inducible nuclear protein 1                                                                | 39   | Sites in UTR | 1 | 0 | 1 | 0 | 0 | 0 |
| TDG        | ENST00000392872.3 | thymine-DNA glycosylase                                                                                      | 201  | Sites in UTR | 1 | 0 | 0 | 1 | 1 | 0 |
| NAIF1      | ENST00000373078.4 | nuclear apoptosis inducing factor 1                                                                          | 19   | Sites in UTR | 1 | 0 | 1 | 0 | 2 | 1 |
| ST6GALNAC6 | ENST00000373146.1 | ST6 (alpha-N-acetylneuraminyl-2,3-beta-galactosyl-1,3)-N-acetylgalactosaminide alpha-2,6-sialyltransferase 6 | 28   | Sites in UTR | 1 | 0 | 0 | 1 | 0 | 0 |
| EIF2B5     | ENST00000273783.3 | eukaryotic translation initiation factor 2B, subunit 5 epsilon, 82kDa                                        | 789  | Sites in UTR | 1 | 1 | 0 | 0 | 0 | 0 |
| MSRB3      | ENST00000308259.5 | methionine sulfoxide reductase B3                                                                            | 83   | Sites in UTR | 1 | 0 | 1 | 0 | 1 | 0 |
| ELOVL6     | ENST00000394607.3 | ELOVL fatty acid elongase 6                                                                                  | 901  | Sites in UTR | 1 | 0 | 1 | 0 | 1 | 0 |
| PRSS35     | ENST00000369700.3 | protease, serine, 35                                                                                         | 23   | Sites in UTR | 1 | 0 | 1 | 0 | 0 | 0 |
| EXO5       | ENST00000296380.4 | exonuclease 5                                                                                                | 237  | Sites in UTR | 1 | 1 | 0 | 0 | 0 | 0 |
| LRFN2      | ENST00000338305.6 | leucine rich repeat and fibronectin type III domain containing 2                                             | 5    | Sites in UTR | 1 | 1 | 0 | 0 | 0 | 0 |
| USP2       | ENST00000455332.2 | ubiquitin specific peptidase 2                                                                               | 19   | Sites in UTR | 1 | 1 | 0 | 0 | 0 | 0 |
| RBAK       | ENST00000396912.1 | RB-associated KRAB zinc finger                                                                               | 99   | Sites in UTR | 1 | 0 | 0 | 1 | 1 | 0 |
| LCOR       | ENST00000371103.3 | ligand dependent nuclear receptor corepressor                                                                | 94   | Sites in UTR | 2 | 1 | 0 | 1 | 0 | 0 |
| ITGA9      | ENST00000264741.5 | integrin, alpha 9                                                                                            | 9    | Sites in UTR | 1 | 0 | 1 | 0 | 5 | 0 |
| SIM1       | ENST00000369208.3 | single-minded homolog 1 (Drosophila)                                                                         | 104  | Sites in UTR | 1 | 1 | 0 | 0 | 0 | 0 |
| GTPBP2     | ENST00000307126.5 | GTP binding protein 2                                                                                        | 388  | Sites in UTR | 1 | 1 | 0 | 0 | 0 | 0 |
| TMEM123    | ENST00000361236.3 | transmembrane protein 123                                                                                    | 2135 | Sites in UTR | 1 | 0 | 1 | 0 | 0 | 0 |
| TMEM120B   | ENST00000449592.2 | transmembrane protein 120B                                                                                   | 60   | Sites in UTR | 2 | 2 | 0 | 0 | 1 | 1 |
| LHX9       | ENST00000367390.3 | LIM homeobox 9                                                                                               | 40   | Sites in UTR | 2 | 0 | 1 | 1 | 0 | 0 |
| ANPEP      | ENST00000300060.6 | alanyl (membrane) aminopeptidase                                                                             | 216  | Sites in UTR | 1 | 1 | 0 | 0 | 0 | 0 |

|               |                   |                                                                                                                  |       |              |   |   |   |   |   |   |
|---------------|-------------------|------------------------------------------------------------------------------------------------------------------|-------|--------------|---|---|---|---|---|---|
| DKFZP779J2370 | ENST00000378904.2 |                                                                                                                  | 20    | Sites in UTR | 1 | 0 | 0 | 1 | 0 | 0 |
| MFS9          | ENST00000258436.5 | major facilitator superfamily domain containing 9                                                                | 395   | Sites in UTR | 1 | 1 | 0 | 0 | 0 | 0 |
| BTG2          | ENST00000290551.4 | BTG family, member 2                                                                                             | 758   | Sites in UTR | 2 | 0 | 2 | 0 | 0 | 0 |
| ETS1          | ENST00000345075.4 | v-ets avian erythroblastosis virus E26 oncogene homolog 1                                                        | 1423  | Sites in UTR | 1 | 1 | 0 | 0 | 2 | 0 |
| TRAPPC6B      | ENST00000330149.5 | trafficking protein particle complex 6B                                                                          | 69    | Sites in UTR | 1 | 0 | 1 | 0 | 0 | 0 |
| RHOQ          | ENST00000238738.4 | ras homolog family member Q                                                                                      | 179   | Sites in UTR | 1 | 0 | 1 | 0 | 0 | 0 |
| KCTD21        | ENST00000340067.3 | potassium channel tetramerization domain containing 21                                                           | 90    | Sites in UTR | 1 | 0 | 1 | 0 | 0 | 0 |
| SEMA4C        | ENST00000305476.5 | sema domain, immunoglobulin domain (Ig), transmembrane domain (TM) and short cytoplasmic domain, (semaphorin) 4C | 31    | Sites in UTR | 1 | 1 | 0 | 0 | 0 | 0 |
| NBEAL2        | ENST00000450053.3 | neurobeachin-like 2                                                                                              | 70    | Sites in UTR | 1 | 1 | 0 | 0 | 1 | 1 |
| CGN           | ENST00000271636.7 | cingulin                                                                                                         | 17    | Sites in UTR | 2 | 1 | 1 | 0 | 0 | 0 |
| ZNRF3         | ENST00000544604.2 | zinc and ring finger 3                                                                                           | 179   | Sites in UTR | 2 | 0 | 1 | 1 | 0 | 0 |
| MBD1          | ENST00000591416.1 | methyl-CpG binding domain protein 1                                                                              | 266   | Sites in UTR | 1 | 1 | 0 | 0 | 0 | 0 |
| ENPP1         | ENST00000360971.2 | ectonucleotide pyrophosphatase/phosphodiesterase 1                                                               | 159   | Sites in UTR | 1 | 1 | 0 | 0 | 1 | 0 |
| ARCN1         | ENST00000534182.2 | archain 1                                                                                                        | 1139  | Sites in UTR | 1 | 0 | 0 | 1 | 1 | 0 |
| BCL2L2        | ENST00000250405.5 | BCL2-like 2                                                                                                      | 1380  | Sites in UTR | 1 | 0 | 0 | 1 | 0 | 0 |
| FBXO45        | ENST00000311630.6 | F-box protein 45                                                                                                 | 72    | Sites in UTR | 1 | 0 | 1 | 0 | 1 | 0 |
| RBM7          | ENST00000540163.1 | RNA binding motif protein 7                                                                                      | 55    | Sites in UTR | 1 | 0 | 1 | 0 | 0 | 0 |
| CAMSAP3       | ENST00000446248.2 | calmodulin regulated spectrin-associated protein family, member 3                                                | 14    | Sites in UTR | 2 | 0 | 1 | 1 | 0 | 0 |
| EMID1         | ENST00000334018.6 | EMI domain containing 1                                                                                          | 845   | Sites in UTR | 1 | 0 | 1 | 0 | 0 | 0 |
| FAM78A        | ENST00000372269.3 | family with sequence similarity 78, member A                                                                     | 7     | Sites in UTR | 1 | 0 | 1 | 0 | 5 | 0 |
| GPC4          | ENST00000370828.3 | glypican 4                                                                                                       | 542   | Sites in UTR | 2 | 1 | 1 | 0 | 0 | 0 |
| ACSL6         | ENST00000379264.2 | acyl-CoA synthetase long-chain family member 6                                                                   | 7     | Sites in UTR | 1 | 0 | 1 | 0 | 0 | 0 |
| DDB2          | ENST00000378601.3 | damage-specific DNA binding protein 2, 48kDa                                                                     | 198   | Sites in UTR | 1 | 1 | 0 | 0 | 0 | 0 |
| AC140061.12   | ENST00000598429.1 | Uncharacterized protein                                                                                          | 11    | Sites in UTR | 1 | 1 | 0 | 0 | 0 | 0 |
| MAPRE2        | ENST00000436190.2 | microtubule-associated protein, RP/EB family, member 2                                                           | 361   | Sites in UTR | 1 | 0 | 1 | 0 | 1 | 0 |
| GPATCH2       | ENST00000366934.3 | G patch domain containing 2                                                                                      | 158   | Sites in UTR | 1 | 0 | 1 | 0 | 0 | 0 |
| SULT4A1       | ENST00000330884.4 | sulfotransferase family 4A, member 1                                                                             | 25    | Sites in UTR | 1 | 0 | 1 | 0 | 0 | 0 |
| CDC42BPG      | ENST00000342711.5 | CDC42 binding protein kinase gamma (DMPK-like)                                                                   | 68    | Sites in UTR | 1 | 1 | 0 | 0 | 0 | 0 |
| MAMDC2        | ENST00000377182.4 | MAM domain containing 2                                                                                          | 365   | Sites in UTR | 1 | 0 | 1 | 0 | 0 | 0 |
| OAZ2          | ENST00000560258.2 | ornithine decarboxylase antizyme 2                                                                               | 2429  | Sites in UTR | 2 | 0 | 2 | 0 | 1 | 0 |
| NRXN1         | ENST00000342183.5 | neurexin 1                                                                                                       | 5     | Sites in UTR | 1 | 1 | 0 | 0 | 0 | 0 |
| ZNF385A       | ENST00000551109.1 | zinc finger protein 385A                                                                                         | 94    | Sites in UTR | 1 | 1 | 0 | 0 | 0 | 0 |
| B3GALNT2      | ENST00000366600.3 | beta-1,3-N-acetylgalactosaminyltransferase 2                                                                     | 106   | Sites in UTR | 1 | 0 | 1 | 0 | 0 | 0 |
| KCNJ9         | ENST00000368088.3 | potassium inwardly-rectifying channel, subfamily J, member 9                                                     | 5     | Sites in UTR | 1 | 0 | 1 | 0 | 3 | 0 |
| SLC17A7       | ENST00000221485.3 | solute carrier family 17 (vesicular glutamate transporter), member 7                                             | 12    | Sites in UTR | 2 | 0 | 2 | 0 | 0 | 0 |
| UBTD1         | ENST00000370664.3 | ubiquitin domain containing 1                                                                                    | 10    | Sites in UTR | 1 | 0 | 1 | 0 | 0 | 0 |
| ITGA1         | ENST00000282588.6 | integrin, alpha 1                                                                                                | 400   | Sites in UTR | 1 | 0 | 0 | 1 | 1 | 0 |
| TMEM86A       | ENST00000280734.2 | transmembrane protein 86A                                                                                        | 5     | Sites in UTR | 1 | 1 | 0 | 0 | 2 | 1 |
| KCNH4         | ENST00000607371.1 | potassium voltage-gated channel, subfamily H (eag-related), member 4                                             | 5     | Sites in UTR | 1 | 0 | 1 | 0 | 1 | 1 |
| GPC6          | ENST00000377047.4 | glypican 6                                                                                                       | 410   | Sites in UTR | 1 | 0 | 1 | 0 | 0 | 0 |
| EBF4          | ENST00000380648.4 | early B-cell factor 4                                                                                            | 1194  | Sites in UTR | 1 | 1 | 0 | 0 | 0 | 0 |
| ARSI          | ENST00000328668.7 | arylsulfatase family, member 1                                                                                   | 19    | Sites in UTR | 1 | 1 | 0 | 0 | 0 | 0 |
| RBM20         | ENST00000369519.3 | RNA binding motif protein 20                                                                                     | 7     | Sites in UTR | 1 | 1 | 0 | 0 | 0 | 0 |
| KCNA1         | ENST00000382545.3 | potassium voltage-gated channel, shaker-related subfamily, member 1 (episodic ataxia with myokymia)              | 5     | Sites in UTR | 1 | 1 | 0 | 0 | 1 | 0 |
| MTMR3         | ENST00000333027.3 | myotubularin related protein 3                                                                                   | 123   | Sites in UTR | 1 | 0 | 1 | 0 | 2 | 0 |
| RAF1          | ENST00000251849.4 | v-raf-1 murine leukemia viral oncogene homolog 1                                                                 | 2422  | Sites in UTR | 1 | 1 | 0 | 0 | 0 | 0 |
| NUP210        | ENST00000254508.5 | nucleoporin 210kDa                                                                                               | 246   | Sites in UTR | 1 | 1 | 0 | 0 | 1 | 1 |
| KLC2          | ENST00000316924.5 | kinesin light chain 2                                                                                            | 11832 | Sites in UTR | 1 | 0 | 1 | 0 | 0 | 0 |
| ELOVL1        | ENST00000372458.3 | ELOVL fatty acid elongase 1                                                                                      | 188   | Sites in UTR | 1 | 0 | 1 | 0 | 0 | 0 |
| KPNA6         | ENST00000373625.3 | karyopherin alpha 6 (importin alpha 7)                                                                           | 272   | Sites in UTR | 1 | 0 | 1 | 0 | 4 | 0 |
| NCKAP5L       | ENST00000335999.6 | NCK-associated protein 5-like                                                                                    | 141   | Sites in UTR | 1 | 1 | 0 | 0 | 0 | 0 |
| DNAL4         | ENST00000216068.4 | dynein, axonemal, light chain 4                                                                                  | 9     | Sites in UTR | 1 | 0 | 0 | 1 | 1 | 0 |
| SEMA4F        | ENST00000357877.2 | sema domain, immunoglobulin domain (Ig), transmembrane domain (TM) and short cytoplasmic domain, (semaphorin) 4F | 32    | Sites in UTR | 2 | 0 | 2 | 0 | 1 | 0 |
| SLC16A6       | ENST00000327268.4 | solute carrier family 16, member 6                                                                               | 17    | Sites in UTR | 1 | 0 | 1 | 0 | 0 | 0 |
| CDKN2B        | ENST00000380142.4 | cyclin-dependent kinase inhibitor 2B (p15, inhibits CDK4)                                                        | 373   | Sites in UTR | 1 | 0 | 1 | 0 | 0 | 0 |
| DGAT1         | ENST00000332324.4 | diacylglycerol O-acyltransferase 1                                                                               | 3108  | Sites in UTR | 1 | 1 | 0 | 0 | 0 | 0 |
| ABCC5         | ENST00000334444.6 | ATP-binding cassette, sub-family C (CFTR/MRP), member 5                                                          | 453   | Sites in UTR | 1 | 0 | 0 | 1 | 1 | 0 |
| RAPGEF5       | ENST00000401957.2 | Rap guanine nucleotide exchange factor (GEF) 5                                                                   | 32    | Sites in UTR | 1 | 1 | 0 | 0 | 0 | 0 |
| HK2           | ENST00000290573.2 | hexokinase 2                                                                                                     | 5     | Sites in UTR | 1 | 1 | 0 | 0 | 0 | 0 |

|               |                   |                                                                                                                  |       |                              |   |   |   |   |    |   |
|---------------|-------------------|------------------------------------------------------------------------------------------------------------------|-------|------------------------------|---|---|---|---|----|---|
| ZNF704        | ENST00000327835.3 | zinc finger protein 704                                                                                          | 124   | <a href="#">Sites in UTR</a> | 3 | 2 | 0 | 1 | 2  | 1 |
| SEMA4B        | ENST00000411539.2 | sema domain, immunoglobulin domain (Ig), transmembrane domain (TM) and short cytoplasmic domain, (semaphorin) 4B | 3850  | <a href="#">Sites in UTR</a> | 1 | 1 | 0 | 0 | 1  | 0 |
| KCNH7         | ENST00000332142.5 | potassium voltage-gated channel, subfamily H (eag-related), member 7                                             | 5     | <a href="#">Sites in UTR</a> | 1 | 0 | 1 | 0 | 0  | 0 |
| EDEM1         | ENST00000256497.4 | ER degradation enhancer, mannosidase alpha-like 1                                                                | 948   | <a href="#">Sites in UTR</a> | 2 | 0 | 1 | 1 | 1  | 0 |
| BCL2          | ENST00000398117.1 | B-cell CLL/lymphoma 2                                                                                            | 55    | <a href="#">Sites in UTR</a> | 1 | 1 | 0 | 0 | 2  | 0 |
| DDX42         | ENST00000578681.1 | DEAD (Asp-Glu-Ala-Asp) box helicase 42                                                                           | 797   | <a href="#">Sites in UTR</a> | 1 | 0 | 1 | 0 | 0  | 0 |
| THY1          | ENST00000284240.5 | Thy-1 cell surface antigen                                                                                       | 2345  | <a href="#">Sites in UTR</a> | 1 | 1 | 0 | 0 | 0  | 0 |
| CRB2          | ENST00000373631.3 | crumbs homolog 2 (Drosophila)                                                                                    | 8     | <a href="#">Sites in UTR</a> | 1 | 1 | 0 | 0 | 2  | 0 |
| AGGF1         | ENST00000312916.7 | angiogenic factor with G patch and FHA domains 1                                                                 | 890   | <a href="#">Sites in UTR</a> | 1 | 0 | 1 | 0 | 0  | 0 |
| FAM134A       | ENST00000430297.2 | family with sequence similarity 134, member A                                                                    | 3080  | <a href="#">Sites in UTR</a> | 1 | 1 | 0 | 0 | 0  | 0 |
| RASL10B       | ENST00000268864.3 | RAS-like, family 10, member B                                                                                    | 1495  | <a href="#">Sites in UTR</a> | 1 | 0 | 0 | 1 | 0  | 0 |
| PKP4          | ENST00000389757.3 | plakophilin 4                                                                                                    | 373   | <a href="#">Sites in UTR</a> | 1 | 0 | 0 | 1 | 0  | 0 |
| ELOVL4        | ENST00000369816.4 | ELOVL fatty acid elongase 4                                                                                      | 129   | <a href="#">Sites in UTR</a> | 1 | 0 | 0 | 1 | 0  | 0 |
| SMG5          | ENST00000361813.5 | SMG5 nonsense mediated mRNA decay factor                                                                         | 1093  | <a href="#">Sites in UTR</a> | 1 | 0 | 1 | 0 | 0  | 0 |
| STX6          | ENST00000258301.5 | syntaxin 6                                                                                                       | 348   | <a href="#">Sites in UTR</a> | 1 | 0 | 0 | 1 | 1  | 0 |
| USP45         | ENST00000392738.2 | ubiquitin specific peptidase 45                                                                                  | 491   | <a href="#">Sites in UTR</a> | 1 | 0 | 1 | 0 | 0  | 0 |
| AIFM1         | ENST00000535724.1 | apoptosis-inducing factor, mitochondrion-associated, 1                                                           | 2582  | <a href="#">Sites in UTR</a> | 1 | 1 | 0 | 0 | 0  | 0 |
| ACER2         | ENST00000340967.2 | alkaline ceramidase 2                                                                                            | 44    | <a href="#">Sites in UTR</a> | 1 | 1 | 0 | 0 | 0  | 0 |
| LURAP1L       | ENST00000319264.3 | leucine rich adaptor protein 1-like                                                                              | 266   | <a href="#">Sites in UTR</a> | 1 | 0 | 0 | 1 | 0  | 0 |
| LOXL1         | ENST00000261921.7 | lysyl oxidase-like 1                                                                                             | 1361  | <a href="#">Sites in UTR</a> | 1 | 1 | 0 | 0 | 0  | 0 |
| PPP2CA        | ENST00000481195.1 | protein phosphatase 2, catalytic subunit, alpha isozyme                                                          | 11344 | <a href="#">Sites in UTR</a> | 1 | 0 | 0 | 1 | 0  | 0 |
| B4GALT1       | ENST00000379731.4 | UDP-Gal:betaGlcNAc beta 1,4- galactosyltransferase, polypeptide 1                                                | 2265  | <a href="#">Sites in UTR</a> | 1 | 0 | 1 | 0 | 1  | 0 |
| CBX7          | ENST00000216133.5 | chromobox homolog 7                                                                                              | 5     | <a href="#">Sites in UTR</a> | 1 | 0 | 1 | 0 | 3  | 1 |
| STAT3         | ENST00000585517.1 | signal transducer and activator of transcription 3 (acute-phase response factor)                                 | 478   | <a href="#">Sites in UTR</a> | 1 | 1 | 0 | 0 | 0  | 0 |
| CASP2         | ENST00000310447.5 | caspase 2, apoptosis-related cysteine peptidase                                                                  | 274   | <a href="#">Sites in UTR</a> | 1 | 1 | 0 | 0 | 0  | 0 |
| PI4K2B        | ENST00000264864.6 | phosphatidylinositol 4-kinase type 2 beta                                                                        | 931   | <a href="#">Sites in UTR</a> | 1 | 0 | 0 | 1 | 0  | 0 |
| HCN3          | ENST00000368358.3 | hyperpolarization activated cyclic nucleotide-gated potassium channel 3                                          | 41    | <a href="#">Sites in UTR</a> | 1 | 1 | 0 | 0 | 0  | 0 |
| MFN1          | ENST00000471841.1 | mitofusin 1                                                                                                      | 502   | <a href="#">Sites in UTR</a> | 1 | 0 | 1 | 0 | 0  | 0 |
| C15orf39      | ENST00000567617.1 | chromosome 15 open reading frame 39                                                                              | 1023  | <a href="#">Sites in UTR</a> | 1 | 1 | 0 | 0 | 0  | 0 |
| KLF16         | ENST00000250916.4 | Kruppel-like factor 16                                                                                           | 5     | <a href="#">Sites in UTR</a> | 2 | 0 | 1 | 1 | 0  | 0 |
| ZNF792        | ENST00000404801.1 | zinc finger protein 792                                                                                          | 95    | <a href="#">Sites in UTR</a> | 2 | 2 | 0 | 0 | 0  | 0 |
| GGA2          | ENST00000309859.4 | golgi-associated, gamma adaptin ear containing, ARF binding protein 2                                            | 645   | <a href="#">Sites in UTR</a> | 1 | 1 | 0 | 0 | 1  | 0 |
| ECE1          | ENST00000415912.2 | endothelin converting enzyme 1                                                                                   | 1166  | <a href="#">Sites in UTR</a> | 1 | 0 | 0 | 1 | 1  | 0 |
| IL16          | ENST00000394660.2 | interleukin 16                                                                                                   | 5     | <a href="#">Sites in UTR</a> | 1 | 0 | 1 | 0 | 2  | 0 |
| GLTP          | ENST00000318348.4 | glycolipid transfer protein                                                                                      | 5     | <a href="#">Sites in UTR</a> | 1 | 0 | 0 | 1 | 0  | 0 |
| DNAJC14       | ENST00000357606.3 | DnaJ (Hsp40) homolog, subfamily C, member 14                                                                     | 1293  | <a href="#">Sites in UTR</a> | 1 | 0 | 0 | 1 | 0  | 0 |
| PGAP3         | ENST00000579146.1 | post-GPI attachment to proteins 3                                                                                | 6     | <a href="#">Sites in UTR</a> | 1 | 1 | 0 | 0 | 0  | 0 |
| EAF1          | ENST00000396842.2 | ELL associated factor 1                                                                                          | 63    | <a href="#">Sites in UTR</a> | 1 | 1 | 0 | 0 | 0  | 0 |
| IFNG          | ENST00000229135.3 | interferon, gamma                                                                                                | 5     | <a href="#">Sites in UTR</a> | 1 | 0 | 1 | 0 | 0  | 0 |
| PTAR1         | ENST00000377200.5 | protein prenyltransferase alpha subunit repeat containing 1                                                      | 161   | <a href="#">Sites in UTR</a> | 2 | 0 | 1 | 1 | 0  | 0 |
| PCDH1         | ENST00000503492.1 | protocadherin 1                                                                                                  | 30    | <a href="#">Sites in UTR</a> | 5 | 0 | 5 | 0 | 0  | 0 |
| GOLGA5        | ENST00000163416.2 | golgin A5                                                                                                        | 35    | <a href="#">Sites in UTR</a> | 1 | 0 | 0 | 1 | 0  | 0 |
| ST6GAL1       | ENST00000169298.3 | ST6 beta-galactosamide alpha-2,6-sialyltransferase 1                                                             | 549   | <a href="#">Sites in UTR</a> | 2 | 1 | 1 | 0 | 0  | 0 |
| RASAL2        | ENST00000448150.3 | RAS protein activator like 2                                                                                     | 950   | <a href="#">Sites in UTR</a> | 1 | 0 | 0 | 1 | 1* | 0 |
| SCLY          | ENST00000254663.6 | selenocysteine lyase                                                                                             | 232   | <a href="#">Sites in UTR</a> | 1 | 0 | 1 | 0 | 0  | 0 |
| GLB1L2        | ENST00000339772.7 | galactosidase, beta 1-like 2                                                                                     | 38    | <a href="#">Sites in UTR</a> | 1 | 1 | 0 | 0 | 0  | 0 |
| CTDSP2        | ENST00000398073.2 | CTD (carboxy-terminal domain, RNA polymerase II, polypeptide A) small phosphatase 2                              | 991   | <a href="#">Sites in UTR</a> | 2 | 0 | 0 | 2 | 0  | 0 |
| RP11-766F14.2 | ENST00000511828.1 | Protein LOC285556                                                                                                | 5     | <a href="#">Sites in UTR</a> | 1 | 0 | 1 | 0 | 1  | 0 |
| C11orf57      | ENST00000532163.1 | chromosome 11 open reading frame 57                                                                              | 207   | <a href="#">Sites in UTR</a> | 1 | 1 | 0 | 0 | 0  | 0 |
| RNF144B       | ENST00000259939.3 | ring finger protein 144B                                                                                         | 17    | <a href="#">Sites in UTR</a> | 1 | 0 | 1 | 0 | 0  | 0 |
| TMED9         | ENST00000332598.6 | transmembrane emp24 protein transport domain containing 9                                                        | 1751  | <a href="#">Sites in UTR</a> | 1 | 0 | 0 | 1 | 0  | 0 |
| ZNF76         | ENST00000373953.3 | zinc finger protein 76                                                                                           | 6     | <a href="#">Sites in UTR</a> | 1 | 0 | 1 | 0 | 0  | 0 |
| RASGRF2       | ENST00000265080.4 | Ras protein-specific guanine nucleotide-releasing factor 2                                                       | 140   | <a href="#">Sites in UTR</a> | 1 | 1 | 0 | 0 | 1  | 1 |
| COPZ1         | ENST00000551779.1 | coatamer protein complex, subunit zeta 1                                                                         | 2623  | <a href="#">Sites in UTR</a> | 1 | 0 | 1 | 0 | 0  | 0 |

|           |                    |                                                                                |      |              |   |   |   |   |   |   |
|-----------|--------------------|--------------------------------------------------------------------------------|------|--------------|---|---|---|---|---|---|
| ANKRD33B  | ENST00000296657.5  | ankyrin repeat domain 33B                                                      | 9    | Sites in UTR | 2 | 1 | 1 | 0 | 3 | 1 |
| SLC7A1    | ENST00000380752.5  | solute carrier family 7 (cationic amino acid transporter, y+ system), member 1 | 338  | Sites in UTR | 1 | 0 | 1 | 0 | 1 | 0 |
| TOMM40    | ENST00000592434.1  | translocase of outer mitochondrial membrane 40 homolog (yeast)                 | 14   | Sites in UTR | 1 | 1 | 0 | 0 | 1 | 0 |
| ITGA8     | ENST00000378076.3  | integrin, alpha 8                                                              | 7    | Sites in UTR | 1 | 1 | 0 | 0 | 0 | 0 |
| LYPD6     | ENST00000334166.4  | LY6/PLAUR domain containing 6                                                  | 261  | Sites in UTR | 1 | 1 | 0 | 0 | 0 | 0 |
| KIAA1598  | ENST00000260777.10 | KIAA1598                                                                       | 94   | Sites in UTR | 1 | 0 | 0 | 1 | 0 | 0 |
| TMEM132E  | ENST00000321639.5  | transmembrane protein 132E                                                     | 461  | Sites in UTR | 1 | 0 | 0 | 1 | 0 | 0 |
| ZNF281    | ENST00000294740.3  | zinc finger protein 281                                                        | 595  | Sites in UTR | 1 | 0 | 0 | 1 | 0 | 0 |
| SCRT2     | ENST00000246104.6  | scratch homolog 2, zinc finger protein (Drosophila)                            | 5    | Sites in UTR | 1 | 0 | 0 | 1 | 0 | 0 |
| OPALIN    | ENST00000371172.3  | oligodendrocytic myelin paranodal and inner loop protein                       | 5    | Sites in UTR | 1 | 0 | 1 | 0 | 0 | 0 |
| ITGA7     | ENST00000553804.1  | integrin, alpha 7                                                              | 100  | Sites in UTR | 1 | 0 | 1 | 0 | 1 | 0 |
| USP37     | ENST00000258399.3  | ubiquitin specific peptidase 37                                                | 14   | Sites in UTR | 1 | 0 | 1 | 0 | 0 | 0 |
| ALDH1A3   | ENST00000329841.5  | aldehyde dehydrogenase 1 family, member A3                                     | 8    | Sites in UTR | 1 | 0 | 1 | 0 | 1 | 0 |
| ZBTB34    | ENST00000319119.4  | zinc finger and BTB domain containing 34                                       | 726  | Sites in UTR | 1 | 1 | 0 | 0 | 0 | 0 |
| ULK3      | ENST00000440863.2  | unc-51 like kinase 3                                                           | 22   | Sites in UTR | 1 | 1 | 0 | 0 | 0 | 0 |
| DPF2      | ENST00000528416.1  | D4, zinc and double PHD fingers family 2                                       | 1164 | Sites in UTR | 1 | 1 | 0 | 0 | 0 | 0 |
| ADAMTS14  | ENST00000373208.1  | ADAM metalloproteinase with thrombospondin type 1 motif, 14                    | 5    | Sites in UTR | 1 | 0 | 0 | 1 | 1 | 0 |
| ERBB3     | ENST00000267101.3  | v-erb-b2 avian erythroblastic leukemia viral oncogene homolog 3                | 926  | Sites in UTR | 1 | 1 | 0 | 0 | 0 | 0 |
| HOXD9     | ENST00000249499.6  | homeobox D9                                                                    | 78   | Sites in UTR | 1 | 1 | 0 | 0 | 0 | 0 |
| CYB5D1    | ENST00000571846.1  | cytochrome b5 domain containing 1                                              | 546  | Sites in UTR | 1 | 1 | 0 | 0 | 2 | 0 |
| PPP2R5C   | ENST00000422945.2  | protein phosphatase 2, regulatory subunit B', gamma                            | 1584 | Sites in UTR | 1 | 0 | 1 | 0 | 0 | 0 |
| H6PD      | ENST00000377403.2  | hexose-6-phosphate dehydrogenase (glucose 1-dehydrogenase)                     | 467  | Sites in UTR | 1 | 0 | 1 | 0 | 3 | 1 |
| PCSK7     | ENST00000320934.3  | proprotein convertase subtilisin/kexin type 7                                  | 92   | Sites in UTR | 1 | 1 | 0 | 0 | 1 | 0 |
| E2F2      | ENST00000361729.2  | E2F transcription factor 2                                                     | 96   | Sites in UTR | 1 | 1 | 0 | 0 | 4 | 1 |
| RASGRF1   | ENST00000558480.2  | Ras protein-specific guanine nucleotide-releasing factor 1                     | 5    | Sites in UTR | 1 | 0 | 1 | 0 | 0 | 0 |
| ADAM9     | ENST00000487273.2  | ADAM metalloproteinase domain 9                                                | 6435 | Sites in UTR | 1 | 0 | 0 | 1 | 0 | 0 |
| SLC4A10   | ENST00000415876.2  | solute carrier family 4, sodium bicarbonate transporter, member 10             | 5    | Sites in UTR | 1 | 1 | 0 | 0 | 0 | 0 |
| TMEM19    | ENST00000266673.5  | transmembrane protein 19                                                       | 1378 | Sites in UTR | 1 | 0 | 1 | 0 | 0 | 0 |
| CDR2L     | ENST00000337231.5  | cerebellar degeneration-related protein 2-like                                 | 28   | Sites in UTR | 1 | 1 | 0 | 0 | 0 | 0 |
| RBM24     | ENST00000379052.5  | RNA binding motif protein 24                                                   | 43   | Sites in UTR | 1 | 0 | 0 | 1 | 0 | 0 |
| ANO6      | ENST00000320560.8  | anoctamin 6                                                                    | 2262 | Sites in UTR | 1 | 0 | 1 | 0 | 0 | 0 |
| SIT1      | ENST00000259608.3  | signaling threshold regulating transmembrane adaptor 1                         | 7    | Sites in UTR | 1 | 0 | 1 | 0 | 0 | 0 |
| GFOD2     | ENST00000268797.7  | glucose-fructose oxidoreductase domain containing 2                            | 36   | Sites in UTR | 1 | 1 | 0 | 0 | 0 | 0 |
| GPALPP1   | ENST00000361121.2  | GPALPP motifs containing 1                                                     | 845  | Sites in UTR | 1 | 0 | 1 | 0 | 0 | 0 |
| TSPAN12   | ENST00000222747.3  | tetraspanin 12                                                                 | 554  | Sites in UTR | 1 | 0 | 0 | 1 | 0 | 0 |
| PPP1R37   | ENST00000221462.4  | protein phosphatase 1, regulatory subunit 37                                   | 513  | Sites in UTR | 1 | 0 | 0 | 1 | 0 | 0 |
| ZC3H7B    | ENST00000352645.4  | zinc finger CCCH-type containing 7B                                            | 888  | Sites in UTR | 2 | 1 | 1 | 0 | 1 | 0 |
| IFFO1     | ENST00000436152.2  | intermediate filament family orphan 1                                          | 552  | Sites in UTR | 1 | 0 | 1 | 0 | 0 | 0 |
| TNFRSF1B  | ENST00000376259.3  | tumor necrosis factor receptor superfamily, member 1B                          | 243  | Sites in UTR | 1 | 0 | 0 | 1 | 0 | 0 |
| TRIB2     | ENST00000155926.4  | tribbles pseudokinase 2                                                        | 68   | Sites in UTR | 1 | 0 | 0 | 1 | 0 | 0 |
| RHOT2     | ENST00000315082.4  | ras homolog family member T2                                                   | 1368 | Sites in UTR | 1 | 0 | 1 | 0 | 1 | 0 |
| SORT1     | ENST00000256637.6  | sortilin 1                                                                     | 2111 | Sites in UTR | 1 | 0 | 1 | 0 | 1 | 0 |
| APC       | ENST00000457016.1  | adenomatous polyposis coli                                                     | 794  | Sites in UTR | 1 | 0 | 0 | 1 | 0 | 0 |
| UBE2R2    | ENST00000263228.3  | ubiquitin-conjugating enzyme E2R 2                                             | 2442 | Sites in UTR | 3 | 1 | 1 | 1 | 0 | 0 |
| FOXQ1     | ENST00000296839.2  | forkhead box Q1                                                                | 181  | Sites in UTR | 1 | 0 | 0 | 1 | 0 | 0 |
| HIF1AN    | ENST00000299163.6  | hypoxia inducible factor 1, alpha subunit inhibitor                            | 1545 | Sites in UTR | 3 | 0 | 3 | 0 | 5 | 2 |
| TBX4      | ENST00000393853.4  | T-box 4                                                                        | 21   | Sites in UTR | 1 | 0 | 1 | 0 | 0 | 0 |
| DAZAP2    | ENST00000412716.3  | DAZ associated protein 2                                                       | 4265 | Sites in UTR | 1 | 0 | 0 | 1 | 0 | 0 |
| KIAA0319L | ENST00000325722.3  | KIAA0319-like                                                                  | 2090 | Sites in UTR | 2 | 0 | 2 | 0 | 1 | 0 |
| HAPLN1    | ENST00000274341.4  | hyaluronan and proteoglycan link protein 1                                     | 5    | Sites in UTR | 1 | 0 | 1 | 0 | 0 | 0 |
| PGP       | ENST00000333503.7  | phosphoglycolate phosphatase                                                   | 153  | Sites in UTR | 1 | 0 | 0 | 1 | 1 | 0 |
| MLF2      | ENST00000435120.1  | myeloid leukemia factor 2                                                      | 623  | Sites in UTR | 1 | 1 | 0 | 0 | 0 | 0 |
| LNPEP     | ENST00000231368.5  | leucyl/cystinyl aminopeptidase                                                 | 28   | Sites in UTR | 1 | 0 | 1 | 0 | 3 | 0 |
| LCLAT1    | ENST00000309052.4  | lysocardiolipin acyltransferase 1                                              | 397  | Sites in UTR | 1 | 1 | 0 | 0 | 0 | 0 |
| IGSF11    | ENST00000425327.2  | immunoglobulin superfamily, member 11                                          | 5    | Sites in UTR | 1 | 0 | 1 | 0 | 1 | 0 |
| ANKRD44   | ENST00000282272.8  | ankyrin repeat domain 44                                                       | 187  | Sites in UTR | 1 | 0 | 1 | 0 | 0 | 0 |
| PHOX2B    | ENST00000226382.2  | paired-like homeobox 2b                                                        | 5    | Sites in UTR | 1 | 0 | 1 | 0 | 1 | 0 |
| COL4A3    | ENST00000396578.3  | collagen, type IV, alpha 3 (Goodpasture antigen)                               | 286  | Sites in UTR | 1 | 1 | 0 | 0 | 1 | 0 |

|              |                   |                                                                                                 |       |                              |   |   |   |   |   |   |
|--------------|-------------------|-------------------------------------------------------------------------------------------------|-------|------------------------------|---|---|---|---|---|---|
| CTHF8        | ENST00000448552.2 | CTF8, chromosome transmission fidelity factor 8 homolog (S. cerevisiae)                         | 13    | <a href="#">Sites in UTR</a> | 1 | 1 | 0 | 0 | 0 | 0 |
| CSRNP1       | ENST00000273153.5 | cysteine-serine-rich nuclear protein 1                                                          | 544   | <a href="#">Sites in UTR</a> | 1 | 0 | 1 | 0 | 0 | 0 |
| ZCCHC8       | ENST00000536306.1 | zinc finger, CCHC domain containing 8                                                           | 297   | <a href="#">Sites in UTR</a> | 1 | 0 | 0 | 1 | 0 | 0 |
| VAV3         | ENST00000370056.4 | vav 3 guanine nucleotide exchange factor                                                        | 1128  | <a href="#">Sites in UTR</a> | 1 | 0 | 0 | 1 | 0 | 0 |
| GOPC         | ENST00000368498.2 | golgi-associated PDZ and coiled-coil motif containing                                           | 451   | <a href="#">Sites in UTR</a> | 1 | 0 | 1 | 0 | 0 | 0 |
| DUSP6        | ENST00000279488.7 | dual specificity phosphatase 6                                                                  | 1056  | <a href="#">Sites in UTR</a> | 1 | 0 | 0 | 1 | 1 | 0 |
| MTUS1        | ENST00000381869.3 | microtubule associated tumor suppressor 1                                                       | 215   | <a href="#">Sites in UTR</a> | 1 | 0 | 1 | 0 | 0 | 0 |
| BRWD1        | ENST00000342449.3 | bromodomain and WD repeat domain containing 1                                                   | 96    | <a href="#">Sites in UTR</a> | 2 | 0 | 0 | 2 | 0 | 0 |
| RP11-17M16.1 | ENST00000532511.1 | Homo sapiens FLJ44313 protein (FLJ44313), mRNA.                                                 | 9     | <a href="#">Sites in UTR</a> | 1 | 0 | 1 | 0 | 0 | 0 |
| LIMD2        | ENST00000259006.3 | LIM domain containing 2                                                                         | 90    | <a href="#">Sites in UTR</a> | 1 | 0 | 1 | 0 | 1 | 0 |
| TGOLN2       | ENST00000377386.3 | trans-golgi network protein 2                                                                   | 1914  | <a href="#">Sites in UTR</a> | 1 | 1 | 0 | 0 | 1 | 0 |
| DPH2         | ENST00000255108.3 | DPH2 homolog (S. cerevisiae)                                                                    | 209   | <a href="#">Sites in UTR</a> | 1 | 1 | 0 | 0 | 0 | 0 |
| PPP1CA       | ENST00000312989.7 | protein phosphatase 1, catalytic subunit, alpha isozyme                                         | 16428 | <a href="#">Sites in UTR</a> | 1 | 0 | 1 | 0 | 1 | 0 |
| ENTPD4       | ENST00000358689.4 | ectonucleoside triphosphate diphosphohydrolase 4                                                | 465   | <a href="#">Sites in UTR</a> | 1 | 0 | 1 | 0 | 0 | 0 |
| CTHF8        | ENST00000574807.1 | Alternative protein CHTF8                                                                       | 8     | <a href="#">Sites in UTR</a> | 1 | 1 | 0 | 0 | 0 | 0 |
| RAB8B        | ENST00000321437.4 | RAB8B, member RAS oncogene family                                                               | 45    | <a href="#">Sites in UTR</a> | 1 | 0 | 1 | 0 | 0 | 0 |
| PHC2         | ENST00000431992.1 | polyhomeotic homolog 2 (Drosophila)                                                             | 11    | <a href="#">Sites in UTR</a> | 1 | 0 | 1 | 0 | 0 | 0 |
| GALNT7       | ENST00000265000.4 | UDP-N-acetyl-alpha-D-galactosamine:polypeptide N-acetyl-galactosaminyltransferase 7 (GalNAc-T7) | 953   | <a href="#">Sites in UTR</a> | 1 | 0 | 1 | 0 | 0 | 0 |
| UBE2W        | ENST00000517608.1 | ubiquitin-conjugating enzyme E2W (putative)                                                     | 102   | <a href="#">Sites in UTR</a> | 1 | 0 | 1 | 0 | 1 | 0 |
| SH3BP4       | ENST00000392011.2 | SH3-domain binding protein 4                                                                    | 783   | <a href="#">Sites in UTR</a> | 1 | 0 | 1 | 0 | 1 | 0 |
| TIMM17B      | ENST00000465150.2 | translocase of inner mitochondrial membrane 17 homolog B (yeast)                                | 35084 | <a href="#">Sites in UTR</a> | 1 | 0 | 1 | 0 | 0 | 0 |
| ZC3H12B      | ENST00000338957.4 | zinc finger CCH-type containing 12B                                                             | 29    | <a href="#">Sites in UTR</a> | 1 | 0 | 1 | 0 | 1 | 0 |
| QSOX2        | ENST00000358701.5 | quiescin Q6 sulfhydryl oxidase 2                                                                | 905   | <a href="#">Sites in UTR</a> | 1 | 0 | 0 | 1 | 0 | 0 |
| LGI2         | ENST00000382114.4 | leucine-rich repeat LGI family, member 2                                                        | 32    | <a href="#">Sites in UTR</a> | 1 | 0 | 0 | 1 | 0 | 0 |
| SEL1L        | ENST00000336735.4 | sel-1 suppressor of lin-12-like (C. elegans)                                                    | 1271  | <a href="#">Sites in UTR</a> | 1 | 0 | 0 | 1 | 0 | 0 |
| KIAA1467     | ENST00000197268.8 | KIAA1467                                                                                        | 509   | <a href="#">Sites in UTR</a> | 1 | 0 | 0 | 1 | 1 | 0 |
| FAM134C      | ENST00000309428.5 | family with sequence similarity 134, member C                                                   | 397   | <a href="#">Sites in UTR</a> | 1 | 0 | 1 | 0 | 2 | 0 |
| GPR153       | ENST00000377893.2 | G protein-coupled receptor 153                                                                  | 39    | <a href="#">Sites in UTR</a> | 1 | 0 | 1 | 0 | 0 | 0 |
| FAM222B      | ENST00000582266.1 | family with sequence similarity 222, member B                                                   | 100   | <a href="#">Sites in UTR</a> | 1 | 0 | 1 | 0 | 1 | 0 |
| CBFB         | ENST00000290858.6 | core-binding factor, beta subunit                                                               | 3904  | <a href="#">Sites in UTR</a> | 1 | 0 | 0 | 1 | 0 | 0 |
| SLC38A9      | ENST00000396865.2 | solute carrier family 38, member 9                                                              | 156   | <a href="#">Sites in UTR</a> | 1 | 0 | 1 | 0 | 0 | 0 |
| VPS37B       | ENST00000267202.2 | vacuolar protein sorting 37 homolog B (S. cerevisiae)                                           | 261   | <a href="#">Sites in UTR</a> | 1 | 0 | 0 | 1 | 1 | 0 |
| WDR31        | ENST00000341761.4 | WD repeat domain 31                                                                             | 23    | <a href="#">Sites in UTR</a> | 1 | 1 | 0 | 0 | 0 | 0 |
| PARP11       | ENST00000427057.2 | poly (ADP-ribose) polymerase family, member 11                                                  | 75    | <a href="#">Sites in UTR</a> | 1 | 0 | 1 | 0 | 0 | 0 |
| BCAT1        | ENST00000261192.7 | branched chain amino-acid transaminase 1, cytosolic                                             | 1346  | <a href="#">Sites in UTR</a> | 1 | 0 | 1 | 0 | 0 | 0 |
| DNAJB5       | ENST00000545841.1 | DnaJ (Hsp40) homolog, subfamily B, member 5                                                     | 379   | <a href="#">Sites in UTR</a> | 1 | 0 | 1 | 0 | 0 | 0 |
| ASB4         | ENST00000325885.5 | ankyrin repeat and SOCS box containing 4                                                        | 5     | <a href="#">Sites in UTR</a> | 1 | 0 | 0 | 1 | 0 | 0 |
| EPOR         | ENST00000592375.2 | erythropoietin receptor                                                                         | 96    | <a href="#">Sites in UTR</a> | 1 | 0 | 1 | 0 | 1 | 0 |
| ESRRG        | ENST00000361525.3 | estrogen-related receptor gamma                                                                 | 5     | <a href="#">Sites in UTR</a> | 1 | 0 | 0 | 1 | 0 | 0 |
| HNF4G        | ENST00000396423.2 | hepatocyte nuclear factor 4, gamma                                                              | 5     | <a href="#">Sites in UTR</a> | 1 | 0 | 0 | 1 | 0 | 0 |
| KIF18B       | ENST00000587309.1 | kinesin family member 18B                                                                       | 172   | <a href="#">Sites in UTR</a> | 1 | 1 | 0 | 0 | 0 | 0 |
| PAN2         | ENST00000425394.2 | PAN2 poly(A) specific ribonuclease subunit homolog (S. cerevisiae)                              | 310   | <a href="#">Sites in UTR</a> | 1 | 0 | 1 | 0 | 1 | 0 |
| CECR2        | ENST00000400573.5 | cat eye syndrome chromosome region, candidate 2                                                 | 46    | <a href="#">Sites in UTR</a> | 1 | 0 | 0 | 1 | 0 | 0 |
| BCL2L12      | ENST00000246784.3 | BCL2-like 12 (proline rich)                                                                     | 355   | <a href="#">Sites in UTR</a> | 1 | 0 | 1 | 0 | 0 | 0 |
| SNX18        | ENST00000343017.6 | sorting nexin 18                                                                                | 174   | <a href="#">Sites in UTR</a> | 1 | 0 | 0 | 1 | 0 | 0 |
| KIAA0247     | ENST00000342745.4 | KIAA0247                                                                                        | 161   | <a href="#">Sites in UTR</a> | 1 | 0 | 1 | 0 | 0 | 0 |
| DIS3         | ENST00000377767.4 | DIS3 mitotic control homolog (S. cerevisiae)                                                    | 140   | <a href="#">Sites in UTR</a> | 1 | 0 | 0 | 1 | 1 | 0 |
| STC1         | ENST00000290271.2 | stanniocalcin 1                                                                                 | 2932  | <a href="#">Sites in UTR</a> | 1 | 0 | 1 | 0 | 0 | 0 |
| MAPK14       | ENST00000229795.3 | mitogen-activated protein kinase 14                                                             | 1191  | <a href="#">Sites in UTR</a> | 1 | 0 | 1 | 0 | 1 | 1 |
| GRHL1        | ENST00000405379.2 | grainyhead-like 1 (Drosophila)                                                                  | 147   | <a href="#">Sites in UTR</a> | 1 | 0 | 0 | 1 | 0 | 0 |
| GDF11        | ENST00000257868.5 | growth differentiation factor 11                                                                | 847   | <a href="#">Sites in UTR</a> | 1 | 0 | 1 | 0 | 0 | 0 |
| DUSP3        | ENST00000226004.3 | dual specificity phosphatase 3                                                                  | 836   | <a href="#">Sites in UTR</a> | 2 | 0 | 1 | 1 | 0 | 0 |
| CNNM1        | ENST00000356713.4 | cyclin M1                                                                                       | 45    | <a href="#">Sites in UTR</a> | 1 | 0 | 1 | 0 | 0 | 0 |
| AKAP1        | ENST00000337714.3 | A kinase (PRKA) anchor protein 1                                                                | 843   | <a href="#">Sites in UTR</a> | 1 | 0 | 0 | 1 | 0 | 0 |
| LPAR4        | ENST00000435339.3 | lysophosphatidic acid receptor 4                                                                | 5     | <a href="#">Sites in UTR</a> | 1 | 0 | 0 | 1 | 0 | 0 |
| ATL2         | ENST00000378954.4 | atlastin GTPase 2                                                                               | 1135  | <a href="#">Sites in UTR</a> | 1 | 0 | 0 | 1 | 0 | 0 |
| VDR          | ENST00000395324.2 | vitamin D (1,25-dihydroxyvitamin D3) receptor                                                   | 416   | <a href="#">Sites in UTR</a> | 1 | 1 | 0 | 0 | 0 | 0 |



|            |                   |                                                                                |      |                              |   |   |   |   |   |   |
|------------|-------------------|--------------------------------------------------------------------------------|------|------------------------------|---|---|---|---|---|---|
| GPR107     | ENST00000372410.3 | G protein-coupled receptor 107                                                 | 1429 | <a href="#">Sites in UTR</a> | 1 | 1 | 0 | 0 | 1 | 0 |
| DAAM1      | ENST00000395125.1 | dishevelled associated activator of morphogenesis 1                            | 167  | <a href="#">Sites in UTR</a> | 1 | 1 | 0 | 0 | 0 | 0 |
| SLC25A53   | ENST00000357421.4 | solute carrier family 25, member 53                                            | 15   | <a href="#">Sites in UTR</a> | 1 | 0 | 1 | 0 | 0 | 0 |
| USP38      | ENST00000307017.4 | ubiquitin specific peptidase 38                                                | 419  | <a href="#">Sites in UTR</a> | 1 | 0 | 0 | 1 | 0 | 0 |
| AL626787.1 | ENST00000595430.1 |                                                                                | 5    | <a href="#">Sites in UTR</a> | 1 | 0 | 1 | 0 | 0 | 0 |
| UBN1       | ENST00000262376.6 | ubiquitin 1                                                                    | 586  | <a href="#">Sites in UTR</a> | 1 | 1 | 0 | 0 | 1 | 0 |
| LRP4       | ENST00000378623.1 | low density lipoprotein receptor-related protein 4                             | 152  | <a href="#">Sites in UTR</a> | 1 | 1 | 0 | 0 | 1 | 0 |
| TMCC2      | ENST00000358024.3 | transmembrane and coiled-coil domain family 2                                  | 5    | <a href="#">Sites in UTR</a> | 1 | 0 | 0 | 1 | 0 | 0 |
| DIRAS1     | ENST00000323469.4 | DIRAS family, GTP-binding RAS-like 1                                           | 49   | <a href="#">Sites in UTR</a> | 1 | 1 | 0 | 0 | 0 | 0 |
| E2F3       | ENST00000346618.3 | E2F transcription factor 3                                                     | 91   | <a href="#">Sites in UTR</a> | 1 | 1 | 0 | 0 | 0 | 0 |
| ANKRD13B   | ENST00000394859.3 | ankyrin repeat domain 13B                                                      | 72   | <a href="#">Sites in UTR</a> | 1 | 0 | 1 | 0 | 1 | 0 |
| CD248      | ENST00000311330.3 | CD248 molecule, endosialin                                                     | 439  | <a href="#">Sites in UTR</a> | 1 | 0 | 1 | 0 | 2 | 1 |
| NEDD9      | ENST00000379446.5 | neural precursor cell expressed, developmentally down-regulated 9              | 1164 | <a href="#">Sites in UTR</a> | 1 | 0 | 0 | 1 | 0 | 0 |
| ELL        | ENST00000262809.4 | elongation factor RNA polymerase II                                            | 250  | <a href="#">Sites in UTR</a> | 1 | 1 | 0 | 0 | 2 | 0 |
| PHF15      | ENST00000395003.1 | PHD finger protein 15                                                          | 387  | <a href="#">Sites in UTR</a> | 2 | 1 | 1 | 0 | 0 | 0 |
| MYO9A      | ENST00000564571.1 | myosin IXA                                                                     | 137  | <a href="#">Sites in UTR</a> | 1 | 1 | 0 | 0 | 1 | 0 |
| WIZ        | ENST00000389282.4 | widely interspaced zinc finger motifs                                          | 1321 | <a href="#">Sites in UTR</a> | 1 | 0 | 1 | 0 | 2 | 0 |
| PMM2       | ENST00000268261.4 | phosphomannomutase 2                                                           | 65   | <a href="#">Sites in UTR</a> | 1 | 1 | 0 | 0 | 0 | 0 |
| CCDC71L    | ENST00000523505.1 | coiled-coil domain containing 71-like                                          | 410  | <a href="#">Sites in UTR</a> | 1 | 0 | 1 | 0 | 0 | 0 |
| C4orf19    | ENST00000381980.4 | chromosome 4 open reading frame 19                                             | 51   | <a href="#">Sites in UTR</a> | 1 | 0 | 0 | 1 | 0 | 0 |
| FUT1       | ENST00000310160.3 | fucosyltransferase 1 (galactoside 2-alpha-L-fucosyltransferase, H blood group) | 17   | <a href="#">Sites in UTR</a> | 1 | 0 | 0 | 1 | 0 | 0 |
| HRK        | ENST00000257572.5 | harakiri, BCL2 interacting protein (contains only BH3 domain)                  | 19   | <a href="#">Sites in UTR</a> | 1 | 0 | 0 | 1 | 0 | 0 |
| CHAMP1     | ENST00000361283.1 | chromosome alignment maintaining phosphoprotein 1                              | 712  | <a href="#">Sites in UTR</a> | 1 | 0 | 1 | 0 | 0 | 0 |
| SRRM3      | ENST00000388802.4 | serine/arginine repetitive matrix 3                                            | 16   | <a href="#">Sites in UTR</a> | 1 | 1 | 0 | 0 | 1 | 0 |
| ALPK3      | ENST00000258888.5 | alpha-kinase 3                                                                 | 16   | <a href="#">Sites in UTR</a> | 1 | 0 | 1 | 0 | 4 | 1 |
| FAM135B    | ENST00000395297.1 | family with sequence similarity 135, member B                                  | 5    | <a href="#">Sites in UTR</a> | 1 | 0 | 1 | 0 | 0 | 0 |
| PARM1      | ENST00000513238.1 | prostate androgen-regulated mucin-like protein 1                               | 161  | <a href="#">Sites in UTR</a> | 1 | 1 | 0 | 0 | 0 | 0 |
| PQLC1      | ENST00000590381.1 | PQ loop repeat containing 1                                                    | 1060 | <a href="#">Sites in UTR</a> | 1 | 0 | 1 | 0 | 0 | 0 |
| RNF121     | ENST00000393713.3 | ring finger protein 121                                                        | 610  | <a href="#">Sites in UTR</a> | 1 | 0 | 1 | 0 | 0 | 0 |
| ZBTB7A     | ENST00000322357.4 | zinc finger and BTB domain containing 7A                                       | 37   | <a href="#">Sites in UTR</a> | 2 | 1 | 1 | 0 | 2 | 0 |
| RNF217     | ENST00000521654.2 | ring finger protein 217                                                        | 92   | <a href="#">Sites in UTR</a> | 1 | 1 | 0 | 0 | 0 | 0 |
| SGOL1      | ENST00000442720.1 | shugoshin-like 1 (S. pombe)                                                    | 766  | <a href="#">Sites in UTR</a> | 1 | 1 | 0 | 0 | 0 | 0 |
| SLC4A4     | ENST00000340595.3 | solute carrier family 4 (sodium bicarbonate cotransporter), member 4           | 400  | <a href="#">Sites in UTR</a> | 1 | 0 | 1 | 0 | 1 | 0 |
| RREB1      | ENST00000379938.2 | ras responsive element binding protein 1                                       | 340  | <a href="#">Sites in UTR</a> | 1 | 0 | 1 | 0 | 1 | 0 |
| IKZF4      | ENST00000262032.5 | IKAROS family zinc finger 4 (Eos)                                              | 329  | <a href="#">Sites in UTR</a> | 3 | 0 | 2 | 1 | 0 | 0 |
| RORB       | ENST00000376896.3 | RAR-related orphan receptor B                                                  | 5    | <a href="#">Sites in UTR</a> | 1 | 1 | 0 | 0 | 0 | 0 |
| PELI2      | ENST00000267460.4 | pellino E3 ubiquitin protein ligase family member 2                            | 229  | <a href="#">Sites in UTR</a> | 1 | 1 | 0 | 0 | 0 | 0 |
| AKT1S1     | ENST00000391833.1 | AKT1 substrate 1 (proline-rich)                                                | 754  | <a href="#">Sites in UTR</a> | 1 | 1 | 0 | 0 | 0 | 0 |
| SMCR8      | ENST00000406438.3 | Smith-Magenis syndrome chromosome region, candidate 8                          | 219  | <a href="#">Sites in UTR</a> | 1 | 0 | 1 | 0 | 2 | 0 |
| KCNB1      | ENST00000371741.4 | potassium voltage-gated channel, Shab-related subfamily, member 1              | 5    | <a href="#">Sites in UTR</a> | 2 | 0 | 1 | 1 | 1 | 0 |
| SIRT7      | ENST00000328666.6 | sirtuin 7                                                                      | 8    | <a href="#">Sites in UTR</a> | 1 | 0 | 1 | 0 | 0 | 0 |
| SLC27A4    | ENST00000300456.4 | solute carrier family 27 (fatty acid transporter), member 4                    | 523  | <a href="#">Sites in UTR</a> | 1 | 0 | 1 | 0 | 2 | 1 |
| TRIM5      | ENST00000396847.3 | tripartite motif containing 5                                                  | 435  | <a href="#">Sites in UTR</a> | 1 | 0 | 0 | 1 | 1 | 0 |
| PHACTR3    | ENST00000359926.3 | phosphatase and actin regulator 3                                              | 84   | <a href="#">Sites in UTR</a> | 1 | 0 | 0 | 1 | 0 | 0 |
| PTH1R      | ENST00000418619.1 | parathyroid hormone 1 receptor                                                 | 5    | <a href="#">Sites in UTR</a> | 1 | 0 | 1 | 0 | 0 | 0 |
| FAM107B    | ENST00000378470.1 | family with sequence similarity 107, member B                                  | 403  | <a href="#">Sites in UTR</a> | 1 | 0 | 1 | 0 | 0 | 0 |
| LPP        | ENST00000312675.4 | LIM domain containing preferred translocation partner in lipoma                | 1894 | <a href="#">Sites in UTR</a> | 2 | 0 | 1 | 1 | 2 | 0 |
| ZKSCAN5    | ENST00000394170.2 | zinc finger with KRAB and SCAN domains 5                                       | 53   | <a href="#">Sites in UTR</a> | 1 | 0 | 0 | 1 | 0 | 0 |
| LRRC8B     | ENST00000330947.2 | leucine rich repeat containing 8 family, member B                              | 326  | <a href="#">Sites in UTR</a> | 1 | 1 | 0 | 0 | 0 | 0 |
| CLDN12     | ENST00000287916.4 | claudin 12                                                                     | 267  | <a href="#">Sites in UTR</a> | 1 | 0 | 0 | 1 | 0 | 0 |
| C7orf26    | ENST00000344417.5 | chromosome 7 open reading frame 26                                             | 20   | <a href="#">Sites in UTR</a> | 1 | 1 | 0 | 0 | 0 | 0 |
| FAM92B     | ENST00000539556.1 | family with sequence similarity 92, member B                                   | 5    | <a href="#">Sites in UTR</a> | 1 | 0 | 1 | 0 | 0 | 0 |
| FGFR2      | ENST00000369061.4 | fibroblast growth factor receptor 2                                            | 75   | <a href="#">Sites in UTR</a> | 1 | 0 | 0 | 1 | 0 | 0 |
| EEF1G      | ENST00000329251.4 | eukaryotic translation elongation factor 1 gamma                               | 1739 | <a href="#">Sites in UTR</a> | 1 | 0 | 0 | 1 | 0 | 0 |
| FBXO10     | ENST00000432825.2 | F-box protein 10                                                               | 14   | <a href="#">Sites in UTR</a> | 1 | 0 | 1 | 0 | 1 | 0 |
| MEIS2      | ENST00000397624.3 | Meis homeobox 2                                                                | 63   | <a href="#">Sites in UTR</a> | 1 | 0 | 1 | 0 | 0 | 0 |
| SLC35C1    | ENST00000314134.3 | solute carrier family 35 (GDP-fucose transporter), member C1                   | 856  | <a href="#">Sites in UTR</a> | 2 | 0 | 2 | 0 | 0 | 0 |
| ZNF12      | ENST00000404360.1 | zinc finger protein 12                                                         | 304  | <a href="#">Sites in UTR</a> | 1 | 0 | 0 | 1 | 0 | 0 |
| PAFAH1B1   | ENST00000397195.5 | platelet-activating factor acetylhydrolase 1b, regulatory subunit 1 (45kDa)    | 1570 | <a href="#">Sites in UTR</a> | 1 | 1 | 0 | 0 | 0 | 0 |

|              |                   |                                                                                  |      |              |   |   |   |   |    |   |
|--------------|-------------------|----------------------------------------------------------------------------------|------|--------------|---|---|---|---|----|---|
| FLOT2        | ENST00000394906.2 | flotillin 2                                                                      | 37   | Sites in UTR | 1 | 1 | 0 | 0 | 0  | 0 |
| WDR1         | ENST00000499869.2 | WD repeat domain 1                                                               | 8818 | Sites in UTR | 1 | 0 | 0 | 1 | 0  | 0 |
| MORC2        | ENST00000397641.3 | MORC family CW-type zinc finger 2                                                | 216  | Sites in UTR | 1 | 0 | 1 | 0 | 0  | 0 |
| MAF          | ENST00000393350.1 | v-maf avian musculoaponeurotic fibrosarcoma oncogene homolog                     | 608  | Sites in UTR | 1 | 0 | 0 | 1 | 0  | 0 |
| KDM4B        | ENST00000159111.4 | lysine (K)-specific demethylase 4B                                               | 547  | Sites in UTR | 1 | 1 | 0 | 0 | 0  | 0 |
| ADD2         | ENST00000264436.4 | adducin 2 (beta)                                                                 | 59   | Sites in UTR | 1 | 0 | 1 | 0 | 2  | 0 |
| NDRG3        | ENST00000373803.2 | NDRG family member 3                                                             | 960  | Sites in UTR | 1 | 0 | 1 | 0 | 0  | 0 |
| RASSF3       | ENST00000542104.1 | Ras association (RalGDS/AF-6) domain family member 3                             | 461  | Sites in UTR | 1 | 0 | 0 | 1 | 0  | 0 |
| MAP3K1       | ENST00000399503.3 | mitogen-activated protein kinase kinase kinase 1, E3 ubiquitin protein ligase    | 137  | Sites in UTR | 1 | 0 | 0 | 1 | 0  | 0 |
| OVOL1        | ENST00000335987.3 | ovo-like 1 (Drosophila)                                                          | 5    | Sites in UTR | 1 | 0 | 1 | 0 | 0  | 0 |
| BTN2A2       | ENST00000432533.2 | butyrophilin, subfamily 2, member A2                                             | 125  | Sites in UTR | 1 | 1 | 0 | 0 | 0  | 0 |
| USP12        | ENST00000282344.6 | ubiquitin specific peptidase 12                                                  | 35   | Sites in UTR | 1 | 0 | 1 | 0 | 0  | 0 |
| UBR7         | ENST0000013070.6  | ubiquitin protein ligase E3 component n-recognin 7 (putative)                    | 468  | Sites in UTR | 1 | 0 | 0 | 1 | 0  | 0 |
| TAT          | ENST00000355962.4 | tyrosine aminotransferase                                                        | 5    | Sites in UTR | 1 | 1 | 0 | 0 | 0  | 0 |
| PHF20        | ENST00000374012.3 | PHD finger protein 20                                                            | 191  | Sites in UTR | 1 | 0 | 0 | 1 | 1  | 0 |
| CELSR2       | ENST00000271332.3 | cadherin, EGF LAG seven-pass G-type receptor 2                                   | 2475 | Sites in UTR | 1 | 0 | 0 | 1 | 0  | 0 |
| SUN1         | ENST00000456758.2 | Sad1 and UNC84 domain containing 1                                               | 376  | Sites in UTR | 1 | 0 | 0 | 1 | 0  | 0 |
| GPC1         | ENST00000264039.2 | glypican 1                                                                       | 1687 | Sites in UTR | 1 | 0 | 0 | 1 | 1  | 0 |
| KCNJ6        | ENST00000609713.1 | potassium inwardly-rectifying channel, subfamily J, member 6                     | 5    | Sites in UTR | 3 | 2 | 1 | 0 | 1* | 0 |
| QKI          | ENST00000392127.2 | QKI, KH domain containing, RNA binding                                           | 323  | Sites in UTR | 2 | 0 | 0 | 2 | 1  | 0 |
| LIFR         | ENST00000263409.4 | leukemia inhibitory factor receptor alpha                                        | 44   | Sites in UTR | 1 | 0 | 1 | 0 | 1  | 0 |
| RAD51L3-RFFL | ENST00000593039.1 | Uncharacterized protein                                                          | 670  | Sites in UTR | 1 | 0 | 1 | 0 | 1  | 0 |
| NKIRAS2      | ENST00000307641.5 | NFKB inhibitor interacting Ras-like 2                                            | 9685 | Sites in UTR | 1 | 1 | 0 | 0 | 0  | 0 |
| HOXD1        | ENST00000331462.4 | homeobox D1                                                                      | 35   | Sites in UTR | 1 | 0 | 0 | 1 | 0  | 0 |
| ANGPT2       | ENST00000325203.5 | angiopoietin 2                                                                   | 5    | Sites in UTR | 1 | 0 | 0 | 1 | 1  | 0 |
| RAB6B        | ENST00000285208.4 | RAB6B, member RAS oncogene family                                                | 669  | Sites in UTR | 1 | 0 | 0 | 1 | 3  | 1 |
| NT5DC1       | ENST00000319550.4 | 5'-nucleotidase domain containing 1                                              | 127  | Sites in UTR | 1 | 0 | 1 | 0 | 0  | 0 |
| MEGF8        | ENST00000334370.4 | multiple EGF-like-domains 8                                                      | 28   | Sites in UTR | 1 | 0 | 1 | 0 | 0  | 0 |
| RFX5         | ENST00000290524.4 | regulatory factor X, 5 (influences HLA class II expression)                      | 360  | Sites in UTR | 2 | 0 | 0 | 2 | 0  | 0 |
| AMER2        | ENST00000357816.2 | APC membrane recruitment protein 2                                               | 7    | Sites in UTR | 2 | 0 | 0 | 2 | 0  | 0 |
| REEP3        | ENST00000373758.4 | receptor accessory protein 3                                                     | 1095 | Sites in UTR | 1 | 0 | 0 | 1 | 0  | 0 |
| FAM65B       | ENST00000259698.4 | family with sequence similarity 65, member B                                     | 7    | Sites in UTR | 1 | 0 | 1 | 0 | 0  | 0 |
| TADA2B       | ENST00000310074.7 | transcriptional adaptor 2B                                                       | 38   | Sites in UTR | 1 | 0 | 1 | 0 | 0  | 0 |
| RAB22A       | ENST00000244040.3 | RAB22A, member RAS oncogene family                                               | 484  | Sites in UTR | 1 | 1 | 0 | 0 | 0  | 0 |
| TAF9B        | ENST00000341864.5 | TAF9B RNA polymerase II, TATA box binding protein (TBP)-associated factor, 31kDa | 19   | Sites in UTR | 1 | 1 | 0 | 0 | 0  | 0 |
| FMR1         | ENST00000370471.3 | fragile X mental retardation 1                                                   | 1155 | Sites in UTR | 1 | 0 | 0 | 1 | 0  | 0 |
| PPME1        | ENST00000328257.8 | protein phosphatase methyltransferase 1                                          | 343  | Sites in UTR | 1 | 1 | 0 | 0 | 0  | 0 |
| ACVR1C       | ENST00000243349.8 | activin A receptor, type IC                                                      | 27   | Sites in UTR | 2 | 1 | 1 | 0 | 0  | 0 |
| TRPS1        | ENST00000395715.3 | trichorhinophalangeal syndrome I                                                 | 94   | Sites in UTR | 1 | 1 | 0 | 0 | 0  | 0 |
| ACACB        | ENST00000338432.7 | acetyl-CoA carboxylase beta                                                      | 59   | Sites in UTR | 1 | 1 | 0 | 0 | 0  | 0 |
| TSPAN14      | ENST00000429989.3 | tetraspanin 14                                                                   | 239  | Sites in UTR | 1 | 0 | 0 | 1 | 5  | 0 |
| RCN3         | ENST00000270645.3 | reticulocalbin 3, EF-hand calcium binding domain                                 | 3731 | Sites in UTR | 1 | 1 | 0 | 0 | 0  | 0 |
| C1orf109     | ENST00000358011.4 | chromosome 1 open reading frame 109                                              | 6    | Sites in UTR | 1 | 1 | 0 | 0 | 0  | 0 |
| ELAVL4       | ENST00000371824.1 | ELAV like neuron-specific RNA binding protein 4                                  | 5    | Sites in UTR | 1 | 0 | 0 | 1 | 0  | 0 |
| USP46        | ENST00000441222.3 | ubiquitin specific peptidase 46                                                  | 180  | Sites in UTR | 2 | 0 | 1 | 1 | 1  | 1 |
| RFX3         | ENST00000382004.3 | regulatory factor X, 3 (influences HLA class II expression)                      | 37   | Sites in UTR | 2 | 0 | 1 | 1 | 0  | 0 |
| IPPK         | ENST00000287996.3 | inositol 1,3,4,5,6-pentakisphosphate 2-kinase                                    | 211  | Sites in UTR | 1 | 0 | 1 | 0 | 0  | 0 |
| UBASH3B      | ENST00000284273.5 | ubiquitin associated and SH3 domain containing B                                 | 281  | Sites in UTR | 1 | 0 | 0 | 1 | 0  | 0 |
| RASA2        | ENST00000286364.3 | RAS p21 protein activator 2                                                      | 170  | Sites in UTR | 1 | 0 | 0 | 1 | 0  | 0 |
| SHISA6       | ENST00000441885.3 | shisa family member 6                                                            | 5    | Sites in UTR | 1 | 0 | 1 | 0 | 2  | 0 |
| LPCAT4       | ENST00000314891.6 | lysophosphatidylcholine acyltransferase 4                                        | 346  | Sites in UTR | 1 | 0 | 1 | 0 | 0  | 0 |
| BRPF1        | ENST00000383829.2 | bromodomain and PHD finger containing, 1                                         | 351  | Sites in UTR | 1 | 0 | 1 | 0 | 0  | 0 |
| GDNF         | ENST00000326524.2 | glial cell derived neurotrophic factor                                           | 7    | Sites in UTR | 1 | 0 | 1 | 0 | 0  | 0 |
| PCNX         | ENST00000304743.2 | pecanex homolog (Drosophila)                                                     | 458  | Sites in UTR | 1 | 0 | 0 | 1 | 1  | 0 |
| RALGPS2      | ENST00000367635.3 | Ral GEF with PH domain and SH3 binding motif 2                                   | 201  | Sites in UTR | 1 | 0 | 0 | 1 | 0  | 0 |
| SCN5A        | ENST00000414099.2 | sodium channel, voltage-gated, type V, alpha subunit                             | 5    | Sites in UTR | 1 | 0 | 0 | 1 | 0  | 0 |
| ANTXR2       | ENST00000403729.2 | anthrax toxin receptor 2                                                         | 51   | Sites in UTR | 1 | 0 | 1 | 0 | 1  | 0 |
| CDK19        | ENST00000368911.3 | cyclin-dependent kinase 19                                                       | 51   | Sites in UTR | 1 | 0 | 0 | 1 | 1  | 0 |

|          |                   |                                                                             |      |              |   |   |   |   |   |   |
|----------|-------------------|-----------------------------------------------------------------------------|------|--------------|---|---|---|---|---|---|
| ELMSAN1  | ENST00000394071.2 | ELM2 and Myb/SANT-like domain containing 1                                  | 15   | Sites in UTR | 1 | 1 | 0 | 0 | 0 | 0 |
| ZNF304   | ENST00000391705.3 | zinc finger protein 304                                                     | 194  | Sites in UTR | 1 | 1 | 0 | 0 | 0 | 0 |
| FHAD1    | ENST00000358897.4 | forkhead-associated (FHA) phosphopeptide binding domain 1                   | 6    | Sites in UTR | 1 | 0 | 1 | 0 | 1 | 0 |
| TBC1D16  | ENST00000310924.2 | TBC1 domain family, member 16                                               | 556  | Sites in UTR | 1 | 1 | 0 | 0 | 4 | 0 |
| JHDM1D   | ENST00000397560.2 | jumonji C domain containing histone demethylase 1 homolog D (S. cerevisiae) | 470  | Sites in UTR | 1 | 0 | 0 | 1 | 0 | 0 |
| COPS7B   | ENST00000373608.3 | COP9 signalosome subunit 7B                                                 | 331  | Sites in UTR | 1 | 0 | 1 | 0 | 0 | 0 |
| ZNF236   | ENST00000253159.8 | zinc finger protein 236                                                     | 60   | Sites in UTR | 1 | 0 | 0 | 1 | 0 | 0 |
| RORA     | ENST00000335670.6 | RAR-related orphan receptor A                                               | 102  | Sites in UTR | 2 | 2 | 0 | 0 | 0 | 0 |
| KNOP1    | ENST00000219837.7 | lysine-rich nucleolar protein 1                                             | 157  | Sites in UTR | 1 | 0 | 0 | 1 | 0 | 0 |
| ZSCAN29  | ENST00000396976.2 | zinc finger and SCAN domain containing 29                                   | 32   | Sites in UTR | 1 | 1 | 0 | 0 | 1 | 0 |
| SNX27    | ENST00000368843.3 | sorting nexin family member 27                                              | 46   | Sites in UTR | 1 | 0 | 1 | 0 | 2 | 0 |
| ATOX8    | ENST00000306279.3 | atonal homolog 8 (Drosophila)                                               | 21   | Sites in UTR | 1 | 0 | 1 | 0 | 0 | 0 |
| ESYT1    | ENST00000394048.5 | extended synaptotagmin-like protein 1                                       | 401  | Sites in UTR | 1 | 0 | 1 | 0 | 0 | 0 |
| RFFL     | ENST00000315249.7 | ring finger and FYVE-like domain containing E3 ubiquitin protein ligase     | 670  | Sites in UTR | 1 | 0 | 1 | 0 | 1 | 0 |
| ASIC1    | ENST00000228468.4 | acid-sensing (proton-gated) ion channel 1                                   | 111  | Sites in UTR | 1 | 1 | 0 | 0 | 0 | 0 |
| KIAA0556 | ENST00000261588.4 | KIAA0556                                                                    | 169  | Sites in UTR | 1 | 0 | 0 | 1 | 1 | 0 |
| MKNK2    | ENST00000591601.1 | MAP kinase interacting serine/threonine kinase 2                            | 215  | Sites in UTR | 1 | 0 | 1 | 0 | 1 | 0 |
| FAM46A   | ENST00000369754.3 | family with sequence similarity 46, member A                                | 899  | Sites in UTR | 1 | 0 | 0 | 1 | 0 | 0 |
| FOXN3    | ENST00000345097.4 | forkhead box N3                                                             | 42   | Sites in UTR | 1 | 0 | 0 | 1 | 0 | 0 |
| COL11A2  | ENST00000374708.4 | collagen, type XI, alpha 2                                                  | 19   | Sites in UTR | 1 | 0 | 1 | 0 | 0 | 0 |
| CD300LF  | ENST00000361254.4 | CD300 molecule-like family member f                                         | 5    | Sites in UTR | 1 | 0 | 1 | 0 | 0 | 0 |
| GAB4     | ENST00000400588.1 | GRB2-associated binding protein family, member 4                            | 5    | Sites in UTR | 1 | 0 | 0 | 1 | 0 | 0 |
| NCOR2    | ENST00000405201.1 | nuclear receptor corepressor 2                                              | 200  | Sites in UTR | 1 | 0 | 1 | 0 | 0 | 0 |
| TBC1D8B  | ENST00000357242.5 | TBC1 domain family, member 8B (with GRAM domain)                            | 69   | Sites in UTR | 1 | 1 | 0 | 0 | 0 | 0 |
| YES1     | ENST00000577961.1 | v-yes-1 Yamaguchi sarcoma viral oncogene homolog 1                          | 168  | Sites in UTR | 1 | 0 | 0 | 1 | 0 | 0 |
| TMTC2    | ENST00000321196.3 | transmembrane and tetratricopeptide repeat containing 2                     | 173  | Sites in UTR | 1 | 1 | 0 | 0 | 0 | 0 |
| NRG3     | ENST00000372142.2 | neuregulin 3                                                                | 27   | Sites in UTR | 1 | 0 | 0 | 1 | 0 | 0 |
| DPYSL4   | ENST00000338492.4 | dihydropyrimidinase-like 4                                                  | 248  | Sites in UTR | 1 | 0 | 0 | 1 | 0 | 0 |
| TRAF6    | ENST00000526995.1 | TNF receptor-associated factor 6, E3 ubiquitin protein ligase               | 91   | Sites in UTR | 1 | 1 | 0 | 0 | 1 | 0 |
| MAP3K3   | ENST00000361357.3 | mitogen-activated protein kinase kinase kinase 3                            | 144  | Sites in UTR | 1 | 0 | 0 | 1 | 0 | 0 |
| ATG4D    | ENST00000309469.4 | autophagy related 4D, cysteine peptidase                                    | 801  | Sites in UTR | 1 | 0 | 1 | 0 | 0 | 0 |
| DPP9     | ENST00000594671.1 | dipeptidyl-peptidase 9                                                      | 422  | Sites in UTR | 1 | 0 | 1 | 0 | 0 | 0 |
| TACC2    | ENST00000513429.1 | transforming, acidic coiled-coil containing protein 2                       | 225  | Sites in UTR | 1 | 0 | 0 | 1 | 0 | 0 |
| RUSC2    | ENST00000455600.1 | RUN and SH3 domain containing 2                                             | 575  | Sites in UTR | 1 | 1 | 0 | 0 | 0 | 0 |
| BRD4     | ENST00000263377.2 | bromodomain containing 4                                                    | 849  | Sites in UTR | 1 | 0 | 1 | 0 | 1 | 0 |
| SLCO2A1  | ENST00000310926.4 | solute carrier organic anion transporter family, member 2A1                 | 113  | Sites in UTR | 1 | 0 | 1 | 0 | 0 | 0 |
| AKT3     | ENST00000366539.1 | v-akt murine thymoma viral oncogene homolog 3                               | 168  | Sites in UTR | 1 | 0 | 0 | 1 | 1 | 0 |
| NUMBL    | ENST00000252891.4 | numb homolog (Drosophila)-like                                              | 323  | Sites in UTR | 1 | 0 | 0 | 1 | 0 | 0 |
| ASXL3    | ENST00000269197.5 | additional sex combs like 3 (Drosophila)                                    | 65   | Sites in UTR | 1 | 0 | 0 | 1 | 0 | 0 |
| IMPAD1   | ENST00000262644.4 | inositol monophosphatase domain containing 1                                | 1488 | Sites in UTR | 1 | 0 | 0 | 1 | 0 | 0 |
| KLF3     | ENST00000261438.5 | Kruppel-like factor 3 (basic)                                               | 515  | Sites in UTR | 1 | 0 | 0 | 1 | 0 | 0 |
| ZNF699   | ENST00000591998.1 | zinc finger protein 699                                                     | 5    | Sites in UTR | 1 | 1 | 0 | 0 | 1 | 1 |
| MB1      | ENST00000261537.6 | mindbomb E3 ubiquitin protein ligase 1                                      | 897  | Sites in UTR | 1 | 0 | 1 | 0 | 0 | 0 |
| UVRAG    | ENST00000356136.3 | UV radiation resistance associated                                          | 116  | Sites in UTR | 1 | 0 | 1 | 0 | 0 | 0 |
| GDPD5    | ENST00000443276.2 | glycerophosphodiester phosphodiesterase domain containing 5                 | 8    | Sites in UTR | 1 | 1 | 0 | 0 | 0 | 0 |
| YOD1     | ENST00000315927.4 | YOD1 deubiquitinase                                                         | 55   | Sites in UTR | 1 | 0 | 0 | 1 | 0 | 0 |
| ZDHC7    | ENST00000313732.4 | zinc finger, DHHC-type containing 7                                         | 4068 | Sites in UTR | 1 | 0 | 0 | 1 | 0 | 0 |
| ATXN7    | ENST00000295900.6 | ataxin 7                                                                    | 264  | Sites in UTR | 1 | 0 | 0 | 1 | 0 | 0 |
| TMEM170B | ENST00000379426.1 | transmembrane protein 170B                                                  | 489  | Sites in UTR | 1 | 0 | 0 | 1 | 1 | 0 |
| HOXB3    | ENST00000470495.1 | homeobox B3                                                                 | 70   | Sites in UTR | 1 | 1 | 0 | 0 | 0 | 0 |
| IKZF3    | ENST00000346872.3 | IKAROS family zinc finger 3 (Aiolos)                                        | 7    | Sites in UTR | 1 | 0 | 1 | 0 | 1 | 0 |
| PROX1    | ENST00000366958.4 | prospero homeobox 1                                                         | 131  | Sites in UTR | 1 | 0 | 0 | 1 | 0 | 0 |
| NIN      | ENST00000389868.3 | ninein (GSK3B interacting protein)                                          | 594  | Sites in UTR | 1 | 1 | 0 | 0 | 1 | 0 |
| PEAK1    | ENST00000312493.4 | pseudopodium-enriched atypical kinase 1                                     | 209  | Sites in UTR | 1 | 0 | 0 | 1 | 1 | 0 |
| TMEM198  | ENST00000373883.3 | transmembrane protein 198                                                   | 80   | Sites in UTR | 1 | 0 | 1 | 0 | 0 | 0 |
| GAB2     | ENST00000340149.2 | GRB2-associated binding protein 2                                           | 627  | Sites in UTR | 1 | 0 | 0 | 1 | 1 | 0 |
| FAM126B  | ENST00000418596.3 | family with sequence similarity 126, member B                               | 132  | Sites in UTR | 1 | 0 | 0 | 1 | 0 | 0 |
| ANO3     | ENST00000256737.3 | anoctamin 3                                                                 | 5    | Sites in UTR | 1 | 1 | 0 | 0 | 0 | 0 |
| PRKAA2   | ENST00000371244.4 | protein kinase, AMP-activated, alpha 2 catalytic subunit                    | 561  | Sites in UTR | 1 | 1 | 0 | 0 | 0 | 0 |

|          |                   |                                                                                   |      |              |   |   |   |   |    |   |
|----------|-------------------|-----------------------------------------------------------------------------------|------|--------------|---|---|---|---|----|---|
| SEPT11   | ENST00000264893.6 | septin 11                                                                         | 515  | Sites in UTR | 1 | 0 | 0 | 1 | 1  | 0 |
| RNF44    | ENST00000274811.4 | ring finger protein 44                                                            | 1623 | Sites in UTR | 1 | 1 | 0 | 0 | 0  | 0 |
| RBM38    | ENST00000356208.5 | RNA binding motif protein 38                                                      | 18   | Sites in UTR | 1 | 1 | 0 | 0 | 0  | 0 |
| ZNF473   | ENST00000595661.1 | zinc finger protein 473                                                           | 187  | Sites in UTR | 1 | 0 | 1 | 0 | 0  | 0 |
| FAM174B  | ENST00000327355.5 | family with sequence similarity 174, member B                                     | 16   | Sites in UTR | 1 | 0 | 0 | 1 | 0  | 0 |
| YIPF6    | ENST00000462683.1 | Yip1 domain family, member 6                                                      | 888  | Sites in UTR | 1 | 0 | 0 | 1 | 0  | 0 |
| FRMD5    | ENST00000484674.1 | FERM domain containing 5                                                          | 161  | Sites in UTR | 1 | 1 | 0 | 0 | 0  | 0 |
| SH2B3    | ENST00000341259.2 | SH2B adaptor protein 3                                                            | 89   | Sites in UTR | 1 | 0 | 0 | 1 | 0  | 0 |
| STOX2    | ENST00000308497.4 | storkhead box 2                                                                   | 379  | Sites in UTR | 1 | 0 | 1 | 0 | 0  | 0 |
| FAM53C   | ENST00000513056.1 | family with sequence similarity 53, member C                                      | 592  | Sites in UTR | 1 | 0 | 1 | 0 | 0  | 0 |
| TXNRD1   | ENST00000378070.4 | thioredoxin reductase 1                                                           | 1255 | Sites in UTR | 1 | 1 | 0 | 0 | 0  | 0 |
| RIT1     | ENST00000368323.3 | Ras-like without CAAX 1                                                           | 192  | Sites in UTR | 1 | 0 | 0 | 1 | 1  | 0 |
| RASGEF1A | ENST00000374459.1 | RasGEF domain family, member 1A                                                   | 10   | Sites in UTR | 1 | 0 | 0 | 1 | 1  | 0 |
| PACS2    | ENST00000447393.1 | phosphofurin acidic cluster sorting protein 2                                     | 234  | Sites in UTR | 1 | 1 | 0 | 0 | 0  | 0 |
| ST18     | ENST00000276480.7 | suppression of tumorigenicity 18 (breast carcinoma) (zinc finger protein)         | 5    | Sites in UTR | 1 | 0 | 0 | 1 | 0  | 0 |
| SRF      | ENST00000265354.4 | serum response factor (c-fos serum response element-binding transcription factor) | 596  | Sites in UTR | 1 | 0 | 0 | 1 | 1  | 0 |
| AKAP13   | ENST00000394518.2 | A kinase (PRKA) anchor protein 13                                                 | 53   | Sites in UTR | 1 | 0 | 1 | 0 | 1  | 0 |
| ZNF570   | ENST00000388801.3 | zinc finger protein 570                                                           | 12   | Sites in UTR | 1 | 0 | 1 | 0 | 0  | 0 |
| ZBTB37   | ENST00000367701.5 | zinc finger and BTB domain containing 37                                          | 213  | Sites in UTR | 1 | 0 | 0 | 1 | 0  | 0 |
| PPM1H    | ENST00000228705.6 | protein phosphatase, Mg <sup>2+</sup> /Mn <sup>2+</sup> dependent, 1H             | 45   | Sites in UTR | 1 | 0 | 0 | 1 | 0  | 0 |
| ZDHHC9   | ENST00000357166.6 | zinc finger, DHHC-type containing 9                                               | 1203 | Sites in UTR | 1 | 0 | 0 | 1 | 0  | 0 |
| HMGB3    | ENST00000325307.7 | high mobility group box 3                                                         | 295  | Sites in UTR | 1 | 0 | 1 | 0 | 0  | 0 |
| CCNJL    | ENST00000393977.3 | cyclin J-like                                                                     | 66   | Sites in UTR | 1 | 0 | 0 | 1 | 0  | 0 |
| TEF      | ENST00000266304.4 | thyrotrophic embryonic factor                                                     | 60   | Sites in UTR | 1 | 0 | 1 | 0 | 1  | 0 |
| THRA     | ENST00000450525.2 | thyroid hormone receptor, alpha                                                   | 547  | Sites in UTR | 1 | 0 | 1 | 0 | 3  | 0 |
| TLK2     | ENST00000582809.1 | tousled-like kinase 2                                                             | 5    | Sites in UTR | 1 | 0 | 1 | 0 | 1* | 0 |
| TAOK1    | ENST00000261716.3 | TAO kinase 1                                                                      | 164  | Sites in UTR | 1 | 0 | 0 | 1 | 1  | 0 |
| BMPR1B   | ENST00000515059.1 | bone morphogenetic protein receptor, type IB                                      | 44   | Sites in UTR | 1 | 1 | 0 | 0 | 0  | 0 |
| TXNDC16  | ENST00000281741.4 | thioredoxin domain containing 16                                                  | 508  | Sites in UTR | 1 | 1 | 0 | 0 | 1  | 0 |
| FAM89B   | ENST00000449319.2 | family with sequence similarity 89, member B                                      | 289  | Sites in UTR | 1 | 0 | 1 | 0 | 0  | 0 |
| CD34     | ENST00000356522.4 | CD34 molecule                                                                     | 5    | Sites in UTR | 1 | 1 | 0 | 0 | 0  | 0 |
| GINS4    | ENST00000523277.2 | GINS complex subunit 4 (Sld5 homolog)                                             | 500  | Sites in UTR | 1 | 0 | 0 | 1 | 0  | 0 |
| KCNJ12   | ENST00000583088.1 | potassium inwardly-rectifying channel, subfamily J, member 12                     | 9    | Sites in UTR | 1 | 0 | 1 | 0 | 2  | 0 |
| PHYHIP   | ENST00000321613.3 | phytanoyl-CoA 2-hydroxylase interacting protein                                   | 14   | Sites in UTR | 1 | 0 | 1 | 0 | 1  | 0 |
| ZBTB38   | ENST00000514251.1 | zinc finger and BTB domain containing 38                                          | 1270 | Sites in UTR | 1 | 0 | 0 | 1 | 0  | 0 |
| ATP13A3  | ENST00000439040.1 | ATPase type 13A3                                                                  | 243  | Sites in UTR | 1 | 0 | 1 | 0 | 0  | 0 |
| HCN1     | ENST00000303230.4 | hyperpolarization activated cyclic nucleotide-gated potassium channel 1           | 5    | Sites in UTR | 1 | 0 | 0 | 1 | 0  | 0 |
| SLC23A2  | ENST00000338244.1 | solute carrier family 23 (ascorbic acid transporter), member 2                    | 121  | Sites in UTR | 1 | 0 | 0 | 1 | 0  | 0 |
| KCNK3    | ENST00000376959.2 | potassium voltage-gated channel, Shaw-related subfamily, member 3                 | 5    | Sites in UTR | 1 | 1 | 0 | 0 | 0  | 0 |
| ATXN3    | ENST00000545170.1 | ataxin 3                                                                          | 115  | Sites in UTR | 1 | 0 | 0 | 1 | 0  | 0 |
| CORO2B   | ENST00000261861.5 | coronin, actin binding protein, 2B                                                | 751  | Sites in UTR | 1 | 0 | 0 | 1 | 0  | 0 |
| FGF14    | ENST00000376131.4 | fibroblast growth factor 14                                                       | 5    | Sites in UTR | 1 | 0 | 0 | 1 | 0  | 0 |
| STMN3    | ENST00000370053.1 | stathmin-like 3                                                                   | 17   | Sites in UTR | 1 | 1 | 0 | 0 | 1  | 0 |
| AGO2     | ENST00000220592.5 | argonaute RISC catalytic component 2                                              | 350  | Sites in UTR | 1 | 0 | 1 | 0 | 1  | 0 |
| MBOAT2   | ENST00000305997.3 | membrane bound O-acyltransferase domain containing 2                              | 1145 | Sites in UTR | 2 | 1 | 1 | 0 | 0  | 0 |
| NCAN     | ENST00000252575.6 | neurocan                                                                          | 5    | Sites in UTR | 1 | 1 | 0 | 0 | 0  | 0 |
| NCLN     | ENST00000246117.4 | nicalin                                                                           | 442  | Sites in UTR | 1 | 1 | 0 | 0 | 0  | 0 |
| FAM73A   | ENST00000370791.3 | family with sequence similarity 73, member A                                      | 837  | Sites in UTR | 1 | 0 | 0 | 1 | 0  | 0 |
| LIMK1    | ENST00000418310.1 | LIM domain kinase 1                                                               | 464  | Sites in UTR | 1 | 0 | 1 | 0 | 0  | 0 |
| ZC3H11A  | ENST00000332127.4 | zinc finger CCCH-type containing 11A                                              | 71   | Sites in UTR | 1 | 0 | 1 | 0 | 0  | 0 |
| ATXN1    | ENST00000244769.4 | ataxin 1                                                                          | 106  | Sites in UTR | 2 | 1 | 1 | 0 | 0  | 0 |
| VCPIP1   | ENST00000310421.4 | valosin containing protein (p97)/p47 complex interacting protein 1                | 228  | Sites in UTR | 1 | 1 | 0 | 0 | 0  | 0 |
| MOCS1    | ENST00000373186.4 | molybdenum cofactor synthesis 1                                                   | 179  | Sites in UTR | 1 | 0 | 0 | 1 | 0  | 0 |
| HMGCR    | ENST00000287936.4 | 3-hydroxy-3-methylglutaryl-CoA reductase                                          | 1385 | Sites in UTR | 1 | 0 | 1 | 0 | 0  | 0 |
| MSL1     | ENST00000398532.4 | male-specific lethal 1 homolog (Drosophila)                                       | 4715 | Sites in UTR | 1 | 0 | 1 | 0 | 0  | 0 |
| SCD      | ENST00000370355.2 | stearoyl-CoA desaturase (delta-9-desaturase)                                      | 9726 | Sites in UTR | 1 | 0 | 1 | 0 | 0  | 0 |
| GXYLT1   | ENST00000398675.3 | glucoside xylosyltransferase 1                                                    | 126  | Sites in UTR | 1 | 0 | 0 | 1 | 1  | 0 |

|          |                   |                                                                                           |      |              |   |   |   |   |   |   |
|----------|-------------------|-------------------------------------------------------------------------------------------|------|--------------|---|---|---|---|---|---|
| ADAM11   | ENST00000200557.6 | ADAM metalloproteinase domain 11                                                          | 32   | Sites in UTR | 1 | 0 | 1 | 0 | 1 | 0 |
| ZNF652   | ENST00000362063.2 | zinc finger protein 652                                                                   | 33   | Sites in UTR | 1 | 0 | 1 | 0 | 2 | 0 |
| TSHZ2    | ENST00000371497.5 | teashirt zinc finger homeobox 2                                                           | 351  | Sites in UTR | 1 | 0 | 1 | 0 | 1 | 0 |
| NR5A2    | ENST00000367362.3 | nuclear receptor subfamily 5, group A, member 2                                           | 121  | Sites in UTR | 1 | 0 | 0 | 1 | 0 | 0 |
| SCN4B    | ENST00000324727.4 | sodium channel, voltage-gated, type IV, beta subunit                                      | 13   | Sites in UTR | 1 | 1 | 0 | 0 | 0 | 0 |
| CRAMP1L  | ENST00000397412.3 | Crm, cramped-like (Drosophila)                                                            | 731  | Sites in UTR | 1 | 1 | 0 | 0 | 0 | 0 |
| SP9      | ENST00000394967.2 | Sp9 transcription factor                                                                  | 79   | Sites in UTR | 1 | 0 | 0 | 1 | 1 | 0 |
| CCDC85C  | ENST00000380243.4 | coiled-coil domain containing 85C                                                         | 86   | Sites in UTR | 1 | 0 | 1 | 0 | 1 | 0 |
| SARM1    | ENST00000457710.3 | sterile alpha and TIR motif containing 1                                                  | 130  | Sites in UTR | 2 | 2 | 0 | 0 | 1 | 0 |
| BRSK2    | ENST00000382179.1 | BR serine/threonine kinase 2                                                              | 15   | Sites in UTR | 1 | 0 | 0 | 1 | 0 | 0 |
| NUDC     | ENST00000321265.5 | nudC nuclear distribution protein                                                         | 27   | Sites in UTR | 1 | 0 | 1 | 0 | 0 | 0 |
| DAGLA    | ENST00000257215.5 | diacylglycerol lipase, alpha                                                              | 1262 | Sites in UTR | 1 | 0 | 0 | 1 | 0 | 0 |
| STXBPL5L | ENST00000273666.6 | syntaxin binding protein 5-like                                                           | 19   | Sites in UTR | 1 | 0 | 0 | 1 | 1 | 0 |
| ANKRD50  | ENST00000504087.1 | ankyrin repeat domain 50                                                                  | 152  | Sites in UTR | 1 | 1 | 0 | 0 | 0 | 0 |
| ATXN1L   | ENST00000427980.2 | ataxin 1-like                                                                             | 12   | Sites in UTR | 1 | 0 | 1 | 0 | 0 | 0 |
| SPSB4    | ENST00000310546.2 | splA/ryanodine receptor domain and SOCS box containing 4                                  | 419  | Sites in UTR | 1 | 0 | 0 | 1 | 0 | 0 |
| NRM      | ENST00000376420.5 | nurim (nuclear envelope membrane protein)                                                 | 74   | Sites in UTR | 1 | 0 | 1 | 0 | 0 | 0 |
| ADAMTS15 | ENST00000299164.2 | ADAM metalloproteinase with thrombospondin type 1 motif, 15                               | 18   | Sites in UTR | 1 | 0 | 0 | 1 | 0 | 0 |
| TBC1D22B | ENST00000373491.3 | TBC1 domain family, member 22B                                                            | 127  | Sites in UTR | 1 | 0 | 1 | 0 | 0 | 0 |
| RNF144A  | ENST00000320892.6 | ring finger protein 144A                                                                  | 124  | Sites in UTR | 1 | 0 | 0 | 1 | 0 | 0 |
| SOCS4    | ENST00000395472.2 | suppressor of cytokine signaling 4                                                        | 336  | Sites in UTR | 1 | 1 | 0 | 0 | 0 | 0 |
| ASXL2    | ENST00000435504.4 | additional sex combs like 2 (Drosophila)                                                  | 139  | Sites in UTR | 1 | 0 | 1 | 0 | 2 | 0 |
| LEP      | ENST00000308868.4 | leptin                                                                                    | 5    | Sites in UTR | 1 | 1 | 0 | 0 | 0 | 0 |
| MLX      | ENST00000435881.2 | MLX, MAX dimerization protein                                                             | 771  | Sites in UTR | 1 | 0 | 1 | 0 | 1 | 1 |
| C2orf88  | ENST00000340623.4 | chromosome 2 open reading frame 88                                                        | 156  | Sites in UTR | 1 | 0 | 1 | 0 | 0 | 0 |
| MAPK8IP2 | ENST00000399908.2 | mitogen-activated protein kinase 8 interacting protein 2                                  | 88   | Sites in UTR | 1 | 0 | 1 | 0 | 0 | 0 |
| SZRD1    | ENST00000401089.3 | SUZ RNA binding domain containing 1                                                       | 137  | Sites in UTR | 2 | 1 | 1 | 0 | 0 | 0 |
| MGAT4A   | ENST00000264968.3 | mannosyl (alpha-1,3-)-glycoprotein beta-1,4-N-acetylglucosaminyltransferase, isozyme A    | 223  | Sites in UTR | 1 | 0 | 0 | 1 | 1 | 0 |
| BNIP2    | ENST00000267859.3 | BCL2/adenovirus E1B 19kDa interacting protein 2                                           | 1255 | Sites in UTR | 1 | 1 | 0 | 0 | 0 | 0 |
| NAA40    | ENST00000377793.4 | N(alpha)-acetyltransferase 40, NatD catalytic subunit                                     | 217  | Sites in UTR | 1 | 0 | 0 | 1 | 0 | 0 |
| DCP1A    | ENST00000607628.1 | decapping mRNA 1A                                                                         | 87   | Sites in UTR | 1 | 0 | 0 | 1 | 0 | 0 |
| SORCS2   | ENST00000507866.2 | sortilin-related VPS10 domain containing receptor 2                                       | 85   | Sites in UTR | 1 | 0 | 0 | 1 | 1 | 0 |
| TMEM194A | ENST00000379391.3 | transmembrane protein 194A                                                                | 43   | Sites in UTR | 1 | 0 | 0 | 1 | 0 | 0 |
| YWHAG    | ENST00000307630.3 | tyrosine 3-monooxygenase/tryptophan 5-monooxygenase activation protein, gamma polypeptide | 5623 | Sites in UTR | 1 | 1 | 0 | 0 | 0 | 0 |
| UCK2     | ENST00000367879.4 | uridine-cytidine kinase 2                                                                 | 437  | Sites in UTR | 2 | 1 | 1 | 0 | 1 | 0 |
| SCUBE3   | ENST00000274938.7 | signal peptide, CUB domain, EGF-like 3                                                    | 47   | Sites in UTR | 1 | 1 | 0 | 0 | 1 | 0 |
| TLE3     | ENST00000558939.1 | transducin-like enhancer of split 3 (E(sp1) homolog, Drosophila)                          | 520  | Sites in UTR | 1 | 1 | 0 | 0 | 0 | 0 |
| TET3     | ENST00000409262.3 | tet methylcytosine dioxygenase 3                                                          | 1437 | Sites in UTR | 1 | 0 | 0 | 1 | 0 | 0 |
| FNDC3B   | ENST00000336824.4 | fibronectin type III domain containing 3B                                                 | 509  | Sites in UTR | 1 | 1 | 0 | 0 | 0 | 0 |
| HIPK3    | ENST00000303296.4 | homeodomain interacting protein kinase 3                                                  | 933  | Sites in UTR | 1 | 0 | 0 | 1 | 0 | 0 |
| SGSM2    | ENST00000426855.2 | small G protein signaling modulator 2                                                     | 381  | Sites in UTR | 1 | 1 | 0 | 0 | 0 | 0 |
| RHOBTB2  | ENST00000251822.6 | Rho-related BTB domain containing 2                                                       | 32   | Sites in UTR | 1 | 0 | 0 | 1 | 2 | 0 |
| ONECUT2  | ENST00000491143.2 | one cut homeobox 2                                                                        | 847  | Sites in UTR | 1 | 0 | 1 | 0 | 2 | 0 |
| ABL2     | ENST00000502732.1 | c-abl oncogene 2, non-receptor tyrosine kinase                                            | 892  | Sites in UTR | 2 | 0 | 2 | 0 | 1 | 0 |
| ZNF710   | ENST00000268154.4 | zinc finger protein 710                                                                   | 5    | Sites in UTR | 1 | 0 | 1 | 0 | 0 | 0 |
| CACNB1   | ENST00000394303.3 | calcium channel, voltage-dependent, beta 1 subunit                                        | 81   | Sites in UTR | 1 | 1 | 0 | 0 | 0 | 0 |
| DAAM2    | ENST00000538976.1 | dishevelled associated activator of morphogenesis 2                                       | 5    | Sites in UTR | 1 | 0 | 1 | 0 | 1 | 0 |
| CAMK4    | ENST00000282356.4 | calcium/calmodulin-dependent protein kinase IV                                            | 73   | Sites in UTR | 2 | 1 | 1 | 0 | 0 | 0 |
| SMG1     | ENST00000446231.2 | SMG1 phosphatidylinositol 3-kinase-related kinase                                         | 339  | Sites in UTR | 1 | 1 | 0 | 0 | 0 | 0 |
| SLC7A6   | ENST00000219343.6 | solute carrier family 7 (amino acid transporter light chain, y+L system), member 6        | 1044 | Sites in UTR | 1 | 0 | 1 | 0 | 0 | 0 |
| CXorf23  | ENST00000379687.3 | chromosome X open reading frame 23                                                        | 30   | Sites in UTR | 1 | 0 | 1 | 0 | 0 | 0 |
| BTN2A1   | ENST00000429381.1 | butyrophilin, subfamily 2, member A1                                                      | 839  | Sites in UTR | 1 | 0 | 0 | 1 | 0 | 0 |
| TGFBR1   | ENST00000374994.4 | transforming growth factor, beta receptor 1                                               | 249  | Sites in UTR | 1 | 0 | 0 | 1 | 0 | 0 |
| PAK3     | ENST00000372007.5 | p21 protein (Cdc42/Rac)-activated kinase 3                                                | 8    | Sites in UTR | 1 | 0 | 0 | 1 | 0 | 0 |
| KCNH3    | ENST00000257981.6 | potassium voltage-gated channel, subfamily H (eag-related), member 3                      | 5    | Sites in UTR | 1 | 0 | 1 | 0 | 0 | 0 |
| PLEKHM3  | ENST00000427836.2 | pleckstrin homology domain containing, family M, member 3                                 | 11   | Sites in UTR | 1 | 0 | 1 | 0 | 0 | 0 |
| SLC6A17  | ENST00000331565.4 | solute carrier family 6 (neutral amino acid transporter), member 17                       | 5    | Sites in UTR | 1 | 1 | 0 | 0 | 2 | 0 |
| MAPK10   | ENST00000395169.3 | mitogen-activated protein kinase 10                                                       | 5    | Sites in UTR | 1 | 0 | 1 | 0 | 0 | 0 |
| ZNF148   | ENST00000360647.4 | zinc finger protein 148                                                                   | 230  | Sites in UTR | 1 | 0 | 0 | 1 | 1 | 0 |
| NFIB     | ENST00000397575.3 | nuclear factor I/B                                                                        | 1149 | Sites in UTR | 1 | 1 | 0 | 0 | 0 | 0 |
| ARHGEF1  | ENST00000347545.4 | Rho guanine nucleotide exchange factor (GEF) 1                                            | 392  | Sites in UTR | 1 | 0 | 1 | 0 | 0 | 0 |
| IER3IP1  | ENST00000256433.3 | immediate early response 3 interacting protein 1                                          | 1727 | Sites in UTR | 1 | 1 | 0 | 0 | 2 | 0 |

|           |                   |                                                                                 |       |                              |   |   |   |   |   |   |
|-----------|-------------------|---------------------------------------------------------------------------------|-------|------------------------------|---|---|---|---|---|---|
| INTS7     | ENST00000366994.3 | integrator complex subunit 7                                                    | 431   | <a href="#">Sites in UTR</a> | 1 | 1 | 0 | 0 | 1 | 0 |
| GRSF1     | ENST00000254799.6 | G-rich RNA sequence binding factor 1                                            | 4414  | <a href="#">Sites in UTR</a> | 1 | 0 | 1 | 0 | 0 | 0 |
| TMEM170A  | ENST00000357613.4 | transmembrane protein 170A                                                      | 70    | <a href="#">Sites in UTR</a> | 1 | 0 | 0 | 1 | 0 | 0 |
| B4GALT6   | ENST00000306851.5 | UDP-Gal:betaGlcNAc beta 1,4- galactosyltransferase, polypeptide 6               | 146   | <a href="#">Sites in UTR</a> | 1 | 0 | 0 | 1 | 0 | 0 |
| PTPN1     | ENST00000371621.3 | protein tyrosine phosphatase, non-receptor type 1                               | 142   | <a href="#">Sites in UTR</a> | 1 | 0 | 1 | 0 | 0 | 0 |
| VANGL2    | ENST00000368061.2 | VANGL planar cell polarity protein 2                                            | 560   | <a href="#">Sites in UTR</a> | 1 | 0 | 1 | 0 | 0 | 0 |
| CPM       | ENST00000551568.1 | carboxypeptidase M                                                              | 125   | <a href="#">Sites in UTR</a> | 1 | 0 | 0 | 1 | 0 | 0 |
| SP1       | ENST00000426431.2 | Sp1 transcription factor                                                        | 402   | <a href="#">Sites in UTR</a> | 1 | 0 | 0 | 1 | 0 | 0 |
| PLXNA1    | ENST00000393409.2 | plexin A1                                                                       | 189   | <a href="#">Sites in UTR</a> | 2 | 1 | 1 | 0 | 1 | 0 |
| FAM129B   | ENST00000373314.3 | family with sequence similarity 129, member B                                   | 516   | <a href="#">Sites in UTR</a> | 1 | 1 | 0 | 0 | 0 | 0 |
| MAP3K9    | ENST00000554752.2 | mitogen-activated protein kinase kinase kinase 9                                | 44    | <a href="#">Sites in UTR</a> | 1 | 1 | 0 | 0 | 1 | 0 |
| DUSP7     | ENST00000495880.1 | dual specificity phosphatase 7                                                  | 68    | <a href="#">Sites in UTR</a> | 1 | 0 | 0 | 1 | 0 | 0 |
| ERBB2     | ENST00000584450.1 | v-erb-b2 avian erythroblastic leukemia viral oncogene homolog 2                 | 511   | <a href="#">Sites in UTR</a> | 1 | 1 | 0 | 0 | 0 | 0 |
| PDK3      | ENST00000441463.2 | pyruvate dehydrogenase kinase, isozyme 3                                        | 659   | <a href="#">Sites in UTR</a> | 1 | 1 | 0 | 0 | 1 | 0 |
| BAG4      | ENST00000287322.4 | BCL2-associated athanogene 4                                                    | 29    | <a href="#">Sites in UTR</a> | 1 | 1 | 0 | 0 | 0 | 0 |
| INO80D    | ENST00000403263.1 | INO80 complex subunit D                                                         | 5     | <a href="#">Sites in UTR</a> | 1 | 1 | 0 | 0 | 1 | 0 |
| B4GALNT3  | ENST00000266383.5 | beta-1,4-N-acetyl-galactosaminyl transferase 3                                  | 5     | <a href="#">Sites in UTR</a> | 1 | 0 | 0 | 1 | 1 | 0 |
| DCTN1     | ENST00000361874.3 | dynactin 1                                                                      | 1036  | <a href="#">Sites in UTR</a> | 1 | 0 | 1 | 0 | 0 | 0 |
| RAP1A     | ENST00000369709.3 | RAP1A, member of RAS oncogene family                                            | 382   | <a href="#">Sites in UTR</a> | 1 | 1 | 0 | 0 | 0 | 0 |
| SCRT1     | ENST00000332135.4 | scratch homolog 1, zinc finger protein (Drosophila)                             | 5     | <a href="#">Sites in UTR</a> | 1 | 0 | 0 | 1 | 1 | 0 |
| AREL1     | ENST00000356357.4 | apoptosis resistant E3 ubiquitin protein ligase 1                               | 28    | <a href="#">Sites in UTR</a> | 1 | 1 | 0 | 0 | 0 | 0 |
| HCN4      | ENST00000261917.3 | hyperpolarization activated cyclic nucleotide-gated potassium channel 4         | 19    | <a href="#">Sites in UTR</a> | 1 | 1 | 0 | 0 | 0 | 0 |
| CSRNP3    | ENST00000314499.7 | cysteine-serine-rich nuclear protein 3                                          | 24    | <a href="#">Sites in UTR</a> | 1 | 0 | 1 | 0 | 1 | 0 |
| C20orf112 | ENST00000359676.5 | chromosome 20 open reading frame 112                                            | 148   | <a href="#">Sites in UTR</a> | 1 | 0 | 0 | 1 | 1 | 0 |
| CPEB4     | ENST00000265085.5 | cytoplasmic polyadenylation element binding protein 4                           | 472   | <a href="#">Sites in UTR</a> | 1 | 0 | 0 | 1 | 0 | 0 |
| PET100    | ENST00000594797.1 | PET100 homolog (S. cerevisiae)                                                  | 5     | <a href="#">Sites in UTR</a> | 1 | 0 | 1 | 0 | 0 | 0 |
| TMEM229B  | ENST00000557006.1 | transmembrane protein 229B                                                      | 5     | <a href="#">Sites in UTR</a> | 1 | 0 | 1 | 0 | 0 | 0 |
| SNAP29    | ENST00000215730.7 | synaptosomal-associated protein, 29kDa                                          | 766   | <a href="#">Sites in UTR</a> | 1 | 1 | 0 | 0 | 0 | 0 |
| KLHL24    | ENST00000454652.2 | kelch-like family member 24                                                     | 143   | <a href="#">Sites in UTR</a> | 1 | 1 | 0 | 0 | 0 | 0 |
| CNNM2     | ENST00000369878.4 | cyclin M2                                                                       | 517   | <a href="#">Sites in UTR</a> | 1 | 0 | 1 | 0 | 4 | 0 |
| FAT4      | ENST00000394329.3 | FAT atypical cadherin 4                                                         | 75    | <a href="#">Sites in UTR</a> | 1 | 0 | 0 | 1 | 0 | 0 |
| ANAPC16   | ENST00000299381.4 | anaphase promoting complex subunit 16                                           | 986   | <a href="#">Sites in UTR</a> | 1 | 1 | 0 | 0 | 1 | 0 |
| SATB2     | ENST00000417098.1 | SATB homeobox 2                                                                 | 820   | <a href="#">Sites in UTR</a> | 1 | 0 | 1 | 0 | 0 | 0 |
| CREB1     | ENST00000432329.2 | cAMP responsive element binding protein 1                                       | 295   | <a href="#">Sites in UTR</a> | 2 | 0 | 1 | 1 | 0 | 0 |
| PTPRF     | ENST00000372414.3 | protein tyrosine phosphatase, receptor type, F                                  | 14842 | <a href="#">Sites in UTR</a> | 1 | 0 | 1 | 0 | 0 | 0 |
| RAPGEF4   | ENST00000409036.1 | Rap guanine nucleotide exchange factor (GEF) 4                                  | 60    | <a href="#">Sites in UTR</a> | 1 | 0 | 1 | 0 | 0 | 0 |
| KIAA1244  | ENST00000251691.4 | KIAA1244                                                                        | 169   | <a href="#">Sites in UTR</a> | 1 | 1 | 0 | 0 | 1 | 0 |
| CORO1C    | ENST00000261401.3 | coronin, actin binding protein, 1C                                              | 1970  | <a href="#">Sites in UTR</a> | 1 | 0 | 1 | 0 | 0 | 0 |
| ARF3      | ENST00000256682.4 | ADP-ribosylation factor 3                                                       | 1093  | <a href="#">Sites in UTR</a> | 1 | 0 | 1 | 0 | 0 | 0 |
| RYK       | ENST00000296084.4 | receptor-like tyrosine kinase                                                   | 51    | <a href="#">Sites in UTR</a> | 1 | 1 | 0 | 0 | 1 | 0 |
| PSMB9     | ENST00000395330.1 | proteasome (prosome, macropain) subunit, beta type, 9                           | 64    | <a href="#">Sites in UTR</a> | 1 | 1 | 0 | 0 | 0 | 0 |
| BSN       | ENST00000296452.4 | bassoon presynaptic cytomatrix protein                                          | 31    | <a href="#">Sites in UTR</a> | 1 | 0 | 1 | 0 | 0 | 0 |
| FAM43B    | ENST00000332947.4 | family with sequence similarity 43, member B                                    | 17    | <a href="#">Sites in UTR</a> | 1 | 0 | 1 | 0 | 0 | 0 |
| ZNF512B   | ENST00000369888.1 | zinc finger protein 512B                                                        | 8     | <a href="#">Sites in UTR</a> | 1 | 1 | 0 | 0 | 0 | 0 |
| UBE2J1    | ENST00000435041.2 | ubiquitin-conjugating enzyme E2, J1                                             | 1318  | <a href="#">Sites in UTR</a> | 1 | 0 | 1 | 0 | 0 | 0 |
| SNTB2     | ENST00000336278.4 | syntrophin, beta 2 (dystrophin-associated protein A1, 59kDa, basic component 2) | 254   | <a href="#">Sites in UTR</a> | 1 | 0 | 0 | 1 | 0 | 0 |
| HTR6      | ENST00000289753.1 | 5-hydroxytryptamine (serotonin) receptor 6, G protein-coupled                   | 16    | <a href="#">Sites in UTR</a> | 1 | 1 | 0 | 0 | 0 | 0 |
| PTPRU     | ENST00000428026.2 | protein tyrosine phosphatase, receptor type, U                                  | 261   | <a href="#">Sites in UTR</a> | 1 | 0 | 1 | 0 | 0 | 0 |
| SREBF2    | ENST00000361204.4 | sterol regulatory element binding transcription factor 2                        | 1518  | <a href="#">Sites in UTR</a> | 1 | 0 | 1 | 0 | 0 | 0 |
| PPP1R9B   | ENST00000316878.6 | protein phosphatase 1, regulatory subunit 9B                                    | 120   | <a href="#">Sites in UTR</a> | 1 | 0 | 0 | 1 | 0 | 0 |
| LUZP1     | ENST00000418342.1 | leucine zipper protein 1                                                        | 434   | <a href="#">Sites in UTR</a> | 1 | 0 | 1 | 0 | 1 | 0 |
| MYO1E     | ENST00000288235.4 | myosin IE                                                                       | 198   | <a href="#">Sites in UTR</a> | 1 | 0 | 0 | 1 | 1 | 0 |
| MBNL3     | ENST00000370839.3 | muscleblind-like splicing regulator 3                                           | 593   | <a href="#">Sites in UTR</a> | 1 | 0 | 1 | 0 | 0 | 0 |
| TMED1     | ENST00000214869.2 | transmembrane emp24 protein transport domain containing 1                       | 55    | <a href="#">Sites in UTR</a> | 1 | 1 | 0 | 0 | 0 | 0 |
| CRTC1     | ENST00000338797.6 | CREB regulated transcription coactivator 1                                      | 322   | <a href="#">Sites in UTR</a> | 1 | 0 | 1 | 0 | 3 | 0 |
| SOX12     | ENST00000342665.2 | SRY (sex determining region Y)-box 12                                           | 6341  | <a href="#">Sites in UTR</a> | 1 | 0 | 1 | 0 | 0 | 0 |
| PPP2R1B   | ENST00000527614.1 | protein phosphatase 2, regulatory subunit A, beta                               | 341   | <a href="#">Sites in UTR</a> | 1 | 0 | 1 | 0 | 1 | 0 |
| EPHA7     | ENST00000369303.4 | EPH receptor A7                                                                 | 213   | <a href="#">Sites in UTR</a> | 1 | 0 | 1 | 0 | 0 | 0 |
| C10orf54  | ENST00000394957.3 | chromosome 10 open reading frame 54                                             | 78    | <a href="#">Sites in UTR</a> | 1 | 1 | 0 | 0 | 0 | 0 |
| POLR3H    | ENST00000396504.2 | polymerase (RNA) III (DNA directed) polypeptide H (22.9kD)                      | 216   | <a href="#">Sites in UTR</a> | 1 | 0 | 0 | 1 | 2 | 0 |
| SLCO2B1   | ENST00000289575.5 | solute carrier organic anion transporter family, member 2B1                     | 1614  | <a href="#">Sites in UTR</a> | 1 | 1 | 0 | 0 | 0 | 0 |
| ADAM17    | ENST00000310823.3 | ADAM metalloproteinase domain 17                                                | 96    | <a href="#">Sites in UTR</a> | 1 | 0 | 1 | 0 | 0 | 0 |
| TSKU      | ENST00000333090.4 | tsukushi, small leucine rich proteoglycan                                       | 293   | <a href="#">Sites in UTR</a> | 1 | 0 | 1 | 0 | 1 | 0 |
| SOX11     | ENST00000322002.3 | SRY (sex determining region Y)-box 11                                           | 1100  | <a href="#">Sites in UTR</a> | 1 | 0 | 1 | 0 | 2 | 0 |
| ABAT      | ENST00000268251.8 | 4-aminobutyrate aminotransferase                                                | 66    | <a href="#">Sites in UTR</a> | 1 | 0 | 1 | 0 | 0 | 0 |

|           |                   |                                                                                       |      |              |   |   |   |   |   |   |
|-----------|-------------------|---------------------------------------------------------------------------------------|------|--------------|---|---|---|---|---|---|
| SVIP      | ENST00000354193.4 | small VCP/p97-interacting protein                                                     | 521  | Sites in UTR | 1 | 0 | 0 | 1 | 0 | 0 |
| DTX4      | ENST00000227451.3 | deltex homolog 4 (Drosophila)                                                         | 5    | Sites in UTR | 1 | 1 | 0 | 0 | 1 | 0 |
| PIK3C2B   | ENST00000367187.3 | phosphatidylinositol-4-phosphate 3-kinase, catalytic subunit type 2 beta              | 15   | Sites in UTR | 1 | 0 | 0 | 1 | 0 | 0 |
| ACVR2B    | ENST00000352511.4 | activin A receptor, type IIB                                                          | 21   | Sites in UTR | 1 | 0 | 0 | 1 | 1 | 0 |
| HNRNPUL2  | ENST00000301785.5 | heterogeneous nuclear ribonucleoprotein U-like 2                                      | 2321 | Sites in UTR | 1 | 0 | 1 | 0 | 0 | 0 |
| RND2      | ENST00000544533.1 | Rho family GTPase 2                                                                   | 26   | Sites in UTR | 1 | 1 | 0 | 0 | 0 | 0 |
| BMPR2     | ENST00000374574.2 | bone morphogenetic protein receptor, type II (serine/threonine kinase)                | 287  | Sites in UTR | 1 | 0 | 1 | 0 | 0 | 0 |
| RNF168    | ENST00000318037.3 | ring finger protein 168, E3 ubiquitin protein ligase                                  | 748  | Sites in UTR | 1 | 1 | 0 | 0 | 0 | 0 |
| CDS2      | ENST00000460006.1 | CDP-diacylglycerol synthase (phosphatidate cytidyltransferase) 2                      | 782  | Sites in UTR | 1 | 0 | 0 | 1 | 4 | 0 |
| SMAD2     | ENST00000262160.6 | SMAD family member 2                                                                  | 1196 | Sites in UTR | 1 | 0 | 0 | 1 | 1 | 0 |
| MMP11     | ENST00000215743.3 | matrix metalloproteinase 11 (stromelysin 3)                                           | 1719 | Sites in UTR | 1 | 0 | 1 | 0 | 2 | 0 |
| RIMKLA    | ENST00000431473.3 | ribosomal modification protein rimK-like family member A                              | 100  | Sites in UTR | 1 | 0 | 1 | 0 | 3 | 0 |
| HIC2      | ENST00000407464.2 | hypermethylated in cancer 2                                                           | 28   | Sites in UTR | 2 | 1 | 0 | 1 | 2 | 0 |
| CDC37L1   | ENST00000381854.3 | cell division cycle 37-like 1                                                         | 280  | Sites in UTR | 1 | 1 | 0 | 0 | 1 | 0 |
| TMEM87B   | ENST00000283206.4 | transmembrane protein 87B                                                             | 219  | Sites in UTR | 1 | 0 | 1 | 0 | 0 | 0 |
| JMY       | ENST00000396137.4 | junction mediating and regulatory protein, p53 cofactor                               | 10   | Sites in UTR | 1 | 0 | 0 | 1 | 0 | 0 |
| MARK2     | ENST00000402010.2 | MAP/microtubule affinity-regulating kinase 2                                          | 845  | Sites in UTR | 1 | 0 | 1 | 0 | 0 | 0 |
| CPSF6     | ENST00000435070.2 | cleavage and polyadenylation specific factor 6, 68kDa                                 | 5819 | Sites in UTR | 1 | 1 | 0 | 0 | 0 | 0 |
| SUV39H2   | ENST00000313519.5 | suppressor of variegation 3-9 homolog 2 (Drosophila)                                  | 54   | Sites in UTR | 1 | 0 | 1 | 0 | 0 | 0 |
| UHRF1BP1L | ENST00000279907.7 | UHRF1 binding protein 1-like                                                          | 369  | Sites in UTR | 1 | 1 | 0 | 0 | 0 | 0 |
| WIPF2     | ENST00000323571.4 | WAS/WASL interacting protein family, member 2                                         | 214  | Sites in UTR | 1 | 0 | 1 | 0 | 1 | 0 |
| PPAT      | ENST00000264220.2 | phosphoribosyl pyrophosphate amidotransferase                                         | 61   | Sites in UTR | 1 | 1 | 0 | 0 | 0 | 0 |
| FAM83F    | ENST00000333407.6 | family with sequence similarity 83, member F                                          | 5    | Sites in UTR | 1 | 1 | 0 | 0 | 1 | 0 |
| CDK16     | ENST00000457458.2 | cyclin-dependent kinase 16                                                            | 2095 | Sites in UTR | 1 | 0 | 1 | 0 | 0 | 0 |
| NIPA1     | ENST00000337435.4 | non imprinted in Prader-Willi/Angelman syndrome 1                                     | 805  | Sites in UTR | 1 | 1 | 0 | 0 | 0 | 0 |
| ZNF395    | ENST00000344423.5 | zinc finger protein 395                                                               | 1044 | Sites in UTR | 1 | 1 | 0 | 0 | 1 | 0 |
| ZNF691    | ENST00000372508.3 | zinc finger protein 691                                                               | 115  | Sites in UTR | 1 | 1 | 0 | 0 | 0 | 0 |
| FRAS1     | ENST00000264895.6 | Fraser syndrome 1                                                                     | 709  | Sites in UTR | 1 | 0 | 0 | 1 | 0 | 0 |
| RNASEH2C  | ENST00000308418.4 | ribonuclease H2, subunit C                                                            | 1330 | Sites in UTR | 1 | 0 | 1 | 0 | 1 | 0 |
| SYT7      | ENST00000263846.4 | synaptotagmin VII                                                                     | 192  | Sites in UTR | 2 | 0 | 2 | 0 | 2 | 0 |
| SMURF1    | ENST00000361368.2 | SMAD specific E3 ubiquitin protein ligase 1                                           | 58   | Sites in UTR | 1 | 1 | 0 | 0 | 0 | 0 |
| ETV6      | ENST00000396373.4 | ets variant 6                                                                         | 44   | Sites in UTR | 1 | 0 | 1 | 0 | 2 | 0 |
| AGO4      | ENST00000373210.3 | argonaute RISC catalytic component 4                                                  | 96   | Sites in UTR | 1 | 0 | 0 | 1 | 0 | 0 |
| SPTBN2    | ENST00000529997.1 | spectrin, beta, non-erythrocytic 2                                                    | 910  | Sites in UTR | 2 | 1 | 1 | 0 | 0 | 0 |
| ACVR2A    | ENST00000241416.7 | activin A receptor, type IIA                                                          | 109  | Sites in UTR | 1 | 0 | 0 | 1 | 0 | 0 |
| FGFR1     | ENST00000397091.5 | fibroblast growth factor receptor 1                                                   | 650  | Sites in UTR | 1 | 0 | 1 | 0 | 0 | 0 |
| ZBTB47    | ENST00000457842.3 | zinc finger and BTB domain containing 47                                              | 81   | Sites in UTR | 1 | 0 | 1 | 0 | 0 | 0 |
| RYR2      | ENST00000366574.2 | ryanodine receptor 2 (cardiac)                                                        | 18   | Sites in UTR | 1 | 0 | 0 | 1 | 0 | 0 |
| SCARF1    | ENST00000571272.1 | scavenger receptor class F, member 1                                                  | 5    | Sites in UTR | 1 | 0 | 1 | 0 | 0 | 0 |
| ERCC6     | ENST0000035832.5  | excision repair cross-complementing rodent repair deficiency, complementation group 6 | 93   | Sites in UTR | 1 | 0 | 0 | 1 | 1 | 0 |
| ZNF618    | ENST00000288466.7 | zinc finger protein 618                                                               | 778  | Sites in UTR | 1 | 0 | 1 | 0 | 0 | 0 |
| MCL1      | ENST00000369026.2 | myeloid cell leukemia sequence 1 (BCL2-related)                                       | 374  | Sites in UTR | 1 | 1 | 0 | 0 | 0 | 0 |
| PPM1A     | ENST00000395076.4 | protein phosphatase, Mg2+/Mn2+ dependent, 1A                                          | 412  | Sites in UTR | 1 | 0 | 1 | 0 | 0 | 0 |
| CPEB3     | ENST00000412050.4 | cytoplasmic polyadenylation element binding protein 3                                 | 48   | Sites in UTR | 1 | 0 | 1 | 0 | 0 | 0 |
| FOSL2     | ENST00000379619.1 | FOS-like antigen 2                                                                    | 2255 | Sites in UTR | 2 | 1 | 1 | 0 | 2 | 1 |
| ERBB4     | ENST00000342788.4 | v-erb-b2 avian erythroblastic leukemia viral oncogene homolog 4                       | 27   | Sites in UTR | 1 | 0 | 1 | 0 | 1 | 0 |
| PAX9      | ENST00000361487.6 | paired box 9                                                                          | 53   | Sites in UTR | 1 | 0 | 1 | 0 | 0 | 0 |
| REST      | ENST00000309042.7 | RE1-silencing transcription factor                                                    | 31   | Sites in UTR | 1 | 1 | 0 | 0 | 0 | 0 |
| SRGAP2    | ENST00000414007.1 | SLIT-ROBO Rho GTPase activating protein 2                                             | 98   | Sites in UTR | 1 | 0 | 1 | 0 | 1 | 0 |
| NEK10     | ENST00000295720.6 | NIMA-related kinase 10                                                                | 66   | Sites in UTR | 2 | 2 | 0 | 0 | 0 | 0 |
| SLC8A2    | ENST00000236877.6 | solute carrier family 8 (sodium/calcium exchanger), member 2                          | 5    | Sites in UTR | 1 | 1 | 0 | 0 | 0 | 0 |
| IKBK      | ENST00000393549.2 | inhibitor of kappa light polypeptide gene enhancer in B-cells, kinase gamma           | 5    | Sites in UTR | 1 | 1 | 0 | 0 | 0 | 0 |
| MAPK1IP1L | ENST00000395468.4 | mitogen-activated protein kinase 1 interacting protein 1-like                         | 4002 | Sites in UTR | 1 | 0 | 0 | 1 | 1 | 0 |
| CLIP2     | ENST00000223398.6 | CAP-GLY domain containing linker protein 2                                            | 2111 | Sites in UTR | 1 | 1 | 0 | 0 | 0 | 0 |
| GLIS2     | ENST00000262366.3 | GLIS family zinc finger 2                                                             | 17   | Sites in UTR | 1 | 1 | 0 | 0 | 0 | 0 |
| MYO18A    | ENST00000354329.4 | myosin XVIIIa                                                                         | 159  | Sites in UTR | 1 | 1 | 0 | 0 | 0 | 0 |
| NAA25     | ENST00000261745.4 | N(alpha)-acetyltransferase 25, NatB auxiliary subunit                                 | 919  | Sites in UTR | 1 | 1 | 0 | 0 | 0 | 0 |
| BAZ2A     | ENST00000379441.3 | bromodomain adjacent to zinc finger domain, 2A                                        | 48   | Sites in UTR | 1 | 1 | 0 | 0 | 0 | 0 |
| OTUB2     | ENST00000203664.5 | OTU domain, ubiquitin aldehyde binding 2                                              | 110  | Sites in UTR | 1 | 0 | 1 | 0 | 0 | 0 |
| NUP50     | ENST00000347635.4 | nucleoporin 50kDa                                                                     | 57   | Sites in UTR | 1 | 0 | 1 | 0 | 0 | 0 |
| SESTD1    | ENST00000428443.3 | SEC14 and spectrin domains 1                                                          | 478  | Sites in UTR | 1 | 1 | 0 | 0 | 0 | 0 |
| DICER1    | ENST00000541352.1 | dicer 1, ribonuclease type III                                                        | 25   | Sites in UTR | 1 | 0 | 1 | 0 | 0 | 0 |

|          |                   |                                                                         |      |                              |   |   |   |   |   |   |
|----------|-------------------|-------------------------------------------------------------------------|------|------------------------------|---|---|---|---|---|---|
| TMEM110  | ENST00000355083.5 | transmembrane protein 110                                               | 306  | <a href="#">Sites in UTR</a> | 1 | 0 | 0 | 1 | 0 | 0 |
| PSMB5    | ENST00000493471.2 | proteasome (prosome, macropain) subunit, beta type, 5                   | 156  | <a href="#">Sites in UTR</a> | 1 | 0 | 0 | 1 | 1 | 0 |
| CCBE1    | ENST00000439986.4 | collagen and calcium binding EGF domains 1                              | 54   | <a href="#">Sites in UTR</a> | 1 | 0 | 0 | 1 | 0 | 0 |
| M6PR     | ENST00000000412.3 | mannose-6-phosphate receptor (cation dependent)                         | 46   | <a href="#">Sites in UTR</a> | 1 | 1 | 0 | 0 | 0 | 0 |
| SLC35G1  | ENST00000371408.3 | solute carrier family 35, member G1                                     | 227  | <a href="#">Sites in UTR</a> | 1 | 1 | 0 | 0 | 0 | 0 |
| EIF5A2   | ENST00000474096.1 | eukaryotic translation initiation factor 5A2                            | 443  | <a href="#">Sites in UTR</a> | 1 | 0 | 1 | 0 | 0 | 0 |
| NFIC     | ENST00000589123.1 | nuclear factor I/C (CCAAT-binding transcription factor)                 | 26   | <a href="#">Sites in UTR</a> | 1 | 0 | 1 | 0 | 0 | 0 |
| NHSL2    | ENST00000540800.1 | NHS-like 2                                                              | 5    | <a href="#">Sites in UTR</a> | 1 | 0 | 1 | 0 | 0 | 0 |
| ZFHX2    | ENST00000419474.3 | zinc finger homeobox 2                                                  | 7    | <a href="#">Sites in UTR</a> | 1 | 0 | 1 | 0 | 0 | 0 |
| DRD2     | ENST00000355319.2 | dopamine receptor D2                                                    | 5    | <a href="#">Sites in UTR</a> | 1 | 0 | 1 | 0 | 0 | 0 |
| SCARF2   | ENST00000405555.3 | scavenger receptor class F, member 2                                    | 5    | <a href="#">Sites in UTR</a> | 1 | 0 | 1 | 0 | 0 | 0 |
| LAS1L    | ENST00000312391.8 | LAS1-like (S. cerevisiae)                                               | 26   | <a href="#">Sites in UTR</a> | 1 | 0 | 1 | 0 | 0 | 0 |
| NEO1     | ENST00000261908.6 | neogenin 1                                                              | 261  | <a href="#">Sites in UTR</a> | 1 | 0 | 1 | 0 | 0 | 0 |
| G3BP1    | ENST00000394123.3 | GTPase activating protein (SH3 domain) binding protein 1                | 688  | <a href="#">Sites in UTR</a> | 1 | 1 | 0 | 0 | 0 | 0 |
| ATXN7L3  | ENST00000454077.2 | ataxin 7-like 3                                                         | 43   | <a href="#">Sites in UTR</a> | 1 | 0 | 1 | 0 | 0 | 0 |
| TANC2    | ENST00000424789.2 | tetratricopeptide repeat, ankyrin repeat and coiled-coil containing 2   | 155  | <a href="#">Sites in UTR</a> | 1 | 0 | 1 | 0 | 0 | 0 |
| EDC3     | ENST00000315127.4 | enhancer of mRNA decapping 3                                            | 328  | <a href="#">Sites in UTR</a> | 1 | 0 | 1 | 0 | 0 | 0 |
| DNAL1    | ENST00000553645.2 | dynein, axonemal, light chain 1                                         | 81   | <a href="#">Sites in UTR</a> | 1 | 0 | 1 | 0 | 1 | 0 |
| MTUS2    | ENST00000431530.3 | microtubule associated tumor suppressor candidate 2                     | 17   | <a href="#">Sites in UTR</a> | 1 | 0 | 1 | 0 | 0 | 0 |
| PIP4K2B  | ENST00000269554.3 | phosphatidylinositol-5-phosphate 4-kinase, type II, beta                | 148  | <a href="#">Sites in UTR</a> | 1 | 0 | 1 | 0 | 1 | 0 |
| FUT4     | ENST00000358752.2 | fucosyltransferase 4 (alpha (1,3) fucosyltransferase, myeloid-specific) | 354  | <a href="#">Sites in UTR</a> | 1 | 1 | 0 | 0 | 1 | 0 |
| SFT2D2   | ENST00000271375.4 | SFT2 domain containing 2                                                | 97   | <a href="#">Sites in UTR</a> | 1 | 1 | 0 | 0 | 1 | 0 |
| TNFAIP8  | ENST00000504771.2 | tumor necrosis factor, alpha-induced protein 8                          | 608  | <a href="#">Sites in UTR</a> | 1 | 1 | 0 | 0 | 0 | 0 |
| SCARB2   | ENST00000264896.2 | scavenger receptor class B, member 2                                    | 5609 | <a href="#">Sites in UTR</a> | 1 | 1 | 0 | 0 | 0 | 0 |
| SLC31A1  | ENST00000374212.4 | solute carrier family 31 (copper transporter), member 1                 | 171  | <a href="#">Sites in UTR</a> | 1 | 0 | 1 | 0 | 0 | 0 |
| HNRNPR   | ENST00000478691.1 | heterogeneous nuclear ribonucleoprotein R                               | 6629 | <a href="#">Sites in UTR</a> | 1 | 0 | 0 | 1 | 1 | 0 |
| PLCG1    | ENST00000244007.3 | phospholipase C, gamma 1                                                | 69   | <a href="#">Sites in UTR</a> | 1 | 0 | 1 | 0 | 1 | 0 |
| IPMK     | ENST00000373935.3 | inositol polyphosphate multikinase                                      | 196  | <a href="#">Sites in UTR</a> | 1 | 0 | 0 | 1 | 0 | 0 |
| UBE2L3   | ENST00000342192.4 | ubiquitin-conjugating enzyme E2L 3                                      | 1318 | <a href="#">Sites in UTR</a> | 1 | 1 | 0 | 0 | 0 | 0 |
| KIAA1919 | ENST00000368847.4 | KIAA1919                                                                | 73   | <a href="#">Sites in UTR</a> | 1 | 1 | 0 | 0 | 0 | 0 |
| TMBIM6   | ENST00000423828.1 | transmembrane BAX inhibitor motif containing 6                          | 4043 | <a href="#">Sites in UTR</a> | 1 | 1 | 0 | 0 | 0 | 0 |
| TMEM136  | ENST00000529187.1 | transmembrane protein 136                                               | 344  | <a href="#">Sites in UTR</a> | 2 | 0 | 2 | 0 | 0 | 0 |
| MRPL17   | ENST00000288937.6 | mitochondrial ribosomal protein L17                                     | 1447 | <a href="#">Sites in UTR</a> | 1 | 1 | 0 | 0 | 0 | 0 |
| IP6K1    | ENST00000321599.4 | inositol hexakisphosphate kinase 1                                      | 406  | <a href="#">Sites in UTR</a> | 1 | 0 | 1 | 0 | 2 | 0 |
| RAB3IP   | ENST00000483530.2 | RAB3A interacting protein                                               | 73   | <a href="#">Sites in UTR</a> | 1 | 1 | 0 | 0 | 1 | 0 |
| DYRK2    | ENST00000344096.3 | dual-specificity tyrosine-(Y)-phosphorylation regulated kinase 2        | 1091 | <a href="#">Sites in UTR</a> | 1 | 1 | 0 | 0 | 0 | 0 |
| PTRH2    | ENST00000393038.2 | peptidyl-tRNA hydrolase 2                                               | 386  | <a href="#">Sites in UTR</a> | 1 | 1 | 0 | 0 | 0 | 0 |
| RAB3C    | ENST00000282878.4 | RAB3C, member RAS oncogene family                                       | 242  | <a href="#">Sites in UTR</a> | 1 | 0 | 0 | 1 | 0 | 0 |
| SPATS2   | ENST00000553127.1 | spermatogenesis associated, serine-rich 2                               | 779  | <a href="#">Sites in UTR</a> | 1 | 0 | 1 | 0 | 1 | 0 |
| ELAC2    | ENST00000338034.4 | elaC ribonuclease Z 2                                                   | 2017 | <a href="#">Sites in UTR</a> | 1 | 1 | 0 | 0 | 1 | 0 |
| GRK5     | ENST00000392870.2 | G protein-coupled receptor kinase 5                                     | 337  | <a href="#">Sites in UTR</a> | 1 | 0 | 0 | 1 | 0 | 0 |
| PLAGL2   | ENST00000246229.4 | pleiomorphic adenoma gene-like 2                                        | 254  | <a href="#">Sites in UTR</a> | 1 | 1 | 0 | 0 | 0 | 0 |
| VANGL1   | ENST00000355485.2 | VANGL planar cell polarity protein 1                                    | 721  | <a href="#">Sites in UTR</a> | 1 | 1 | 0 | 0 | 1 | 0 |
| SGIP1    | ENST00000371036.3 | SH3-domain GRB2-like (endophilin) interacting protein 1                 | 180  | <a href="#">Sites in UTR</a> | 1 | 0 | 0 | 1 | 0 | 0 |
| CPNE2    | ENST00000290776.8 | copine II                                                               | 1469 | <a href="#">Sites in UTR</a> | 1 | 0 | 1 | 0 | 0 | 0 |
| FO XK2   | ENST00000335255.5 | forkhead box K2                                                         | 450  | <a href="#">Sites in UTR</a> | 1 | 1 | 0 | 0 | 0 | 0 |
| DVL3     | ENST00000313143.3 | dishevelled segment polarity protein 3                                  | 373  | <a href="#">Sites in UTR</a> | 2 | 0 | 2 | 0 | 0 | 0 |
| RBFOX2   | ENST00000449924.2 | RNA binding protein, fox-1 homolog (C. elegans) 2                       | 262  | <a href="#">Sites in UTR</a> | 1 | 0 | 1 | 0 | 0 | 0 |
| AHSA2    | ENST00000394457.3 | AHA1, activator of heat shock 90kDa protein ATPase homolog 2 (yeast)    | 820  | <a href="#">Sites in UTR</a> | 1 | 0 | 1 | 0 | 0 | 0 |
| MXD4     | ENST00000337190.2 | MAX dimerization protein 4                                              | 1173 | <a href="#">Sites in UTR</a> | 1 | 1 | 0 | 0 | 2 | 0 |
| ACOT13   | ENST00000537591.1 | acyl-CoA thioesterase 13                                                | 1489 | <a href="#">Sites in UTR</a> | 1 | 0 | 0 | 1 | 1 | 0 |
| HMGN3    | ENST00000275036.7 | high mobility group nucleosomal binding domain 3                        | 2124 | <a href="#">Sites in UTR</a> | 1 | 1 | 0 | 0 | 0 | 0 |
| STX7     | ENST00000367941.2 | syntaxin 7                                                              | 1395 | <a href="#">Sites in UTR</a> | 1 | 1 | 0 | 0 | 1 | 1 |
| MEF2D    | ENST00000464356.2 | myocyte enhancer factor 2D                                              | 759  | <a href="#">Sites in UTR</a> | 1 | 0 | 0 | 1 | 0 | 0 |
| ABI2     | ENST00000295851.5 | abl-interactor 2                                                        | 877  | <a href="#">Sites in UTR</a> | 1 | 0 | 0 | 1 | 1 | 1 |
| RGS7BP   | ENST00000334025.2 | regulator of G-protein signaling 7 binding protein                      | 5    | <a href="#">Sites in UTR</a> | 1 | 0 | 0 | 1 | 0 | 0 |
| METTL24  | ENST00000338882.4 | methyltransferase like 24                                               | 5    | <a href="#">Sites in UTR</a> | 1 | 1 | 0 | 0 | 0 | 0 |
| CACNG2   | ENST00000300105.6 | calcium channel, voltage-dependent, gamma subunit 2                     | 5    | <a href="#">Sites in UTR</a> | 2 | 0 | 2 | 0 | 1 | 0 |
| KNCN     | ENST00000481882.2 | kinocilin                                                               | 5    | <a href="#">Sites in UTR</a> | 1 | 1 | 0 | 0 | 0 | 0 |
| APOL3    | ENST00000397293.2 | apolipoprotein L, 3                                                     | 5    | <a href="#">Sites in UTR</a> | 1 | 1 | 0 | 0 | 1 | 1 |
| GRIN2A   | ENST00000562109.1 | glutamate receptor, ionotropic, N-methyl D-aspartate 2A                 | 5    | <a href="#">Sites in UTR</a> | 1 | 0 | 1 | 0 | 2 | 0 |
| IL1RAPL1 | ENST00000378993.1 | interleukin 1 receptor accessory protein-like 1                         | 5    | <a href="#">Sites in UTR</a> | 1 | 0 | 0 | 1 | 1 | 0 |
| KCNH1    | ENST00000271751.4 | potassium voltage-gated channel, subfamily H (eag-related), member 1    | 5    | <a href="#">Sites in UTR</a> | 1 | 0 | 1 | 0 | 0 | 0 |
| CNTNAP5  | ENST00000431078.1 | contactin associated protein-like 5                                     | 5    | <a href="#">Sites in UTR</a> | 1 | 0 | 1 | 0 | 1 | 0 |
| GATSL2   | ENST00000426327.3 | GATS protein-like 2                                                     | 5    | <a href="#">Sites in UTR</a> | 1 | 0 | 1 | 0 | 1 | 0 |
| ASB6     | ENST00000277459.4 | ankyrin repeat and SOCS box containing 6                                | 725  | <a href="#">Sites in UTR</a> | 1 | 0 | 1 | 0 | 0 | 0 |



|                        |                                   |                                             |    |                              |   |   |   |   |   |   |
|------------------------|-----------------------------------|---------------------------------------------|----|------------------------------|---|---|---|---|---|---|
| <a href="#">DNAJB1</a> | <a href="#">ENST00000254322.2</a> | DnaJ (Hsp40) homolog, subfamily B, member 1 | 29 | <a href="#">Sites in UTR</a> | 1 | 0 | 1 | 0 | 0 | 0 |
| <a href="#">BTN3A1</a> | <a href="#">ENST00000425234.2</a> | butyrophilin, subfamily 3, member A1        | 5  | <a href="#">Sites in UTR</a> | 1 | 0 | 0 | 1 | 0 | 0 |
| <a href="#">ZNF827</a> | <a href="#">ENST00000379448.4</a> | zinc finger protein 827                     | 17 | <a href="#">Sites in UTR</a> | 1 | 1 | 0 | 0 | 0 | 0 |

\* includes non-canonical sites (centered and/or 3' compensatory)
