# Supplementary material for: Reduced miR-125a-5p level in non-small-cell lung cancer is associated with tumour progression
Source: PubMed Central journal article supplement (PMC6223209; doi:10.1098/rsob.180118), 2018-10-10
Supplement: rsob180118supp5.pdf [file rsob180118supp5.pdf]

# PicTar WEB INTERFACE

|                                                                                                   |                                                                                                                       |
|---------------------------------------------------------------------------------------------------|-----------------------------------------------------------------------------------------------------------------------|
| <b>Choose Species:</b>                                                                            | vertebrate ▼                                                                                                          |
| <b>Choose Dataset:</b>                                                                            | target predictions for all human microRNAs based on conservation in mammals (human, chimp, mouse, rat, dog)           |
| <b>microRNA ID:</b><br>Click above for all microRNAs linked to RFAM                               | hsa-miR-125a ▼                                                                                                        |
| <b>Gene ID:</b><br>Click above for all RefSeq Id's linked to NCBI<br>(Warning: may take ~20 secs) | <input type="text"/><br><b>vertebrates:</b> use RefSeq identifiers, e.g. NM_003483 or Gene symbols (for example HK2). |
| <b>Tissue:</b>                                                                                    | ▼                                                                                                                     |

## PicTar predictions

| Rank<br>Click here for detailed 3'utr alignments and location of predicted site | human Refseq Id              | All miRNAs predicted to target the gene | PicTar score | microRNAs with Anchor sites  | predicted sites for all microRNAs embedded in the UCSC genome browser | annotation                                                                                                                          |
|---------------------------------------------------------------------------------|------------------------------|-----------------------------------------|--------------|------------------------------|-----------------------------------------------------------------------|-------------------------------------------------------------------------------------------------------------------------------------|
| <a href="#">1</a>                                                               | <a href="#">NM_006465</a>    | <a href="#">All miRNA predictions</a>   | 15.15        | <a href="#">hsa-miR-125a</a> | <a href="#">Genome browser</a>                                        | Homo sapiens AT rich interactive domain 3B (BRIGHT- like) (ARID3B), mRNA.                                                           |
| <a href="#">2</a>                                                               | <a href="#">NM_145185</a>    | <a href="#">All miRNA predictions</a>   | 11.10        | <a href="#">hsa-miR-125a</a> | <a href="#">Genome browser</a>                                        | Homo sapiens mitogen-activated protein kinase kinase 7 (MAP2K7), mRNA.                                                              |
| <a href="#">3</a>                                                               | <a href="#">NM_031232</a>    | <a href="#">All miRNA predictions</a>   | 10.74        | <a href="#">hsa-miR-125a</a> | <a href="#">Genome browser</a>                                        | Homo sapiens amyloid beta (A4) precursor protein-binding, family A, member 2 binding protein (APBA2BP), transcript variant 2, mRNA. |
| <a href="#">4</a>                                                               | <a href="#">NM_031231</a>    | <a href="#">All miRNA predictions</a>   | 10.74        | <a href="#">hsa-miR-125a</a> | <a href="#">Genome browser</a>                                        | Homo sapiens amyloid beta (A4) precursor protein-binding, family A, member 2 binding protein (APBA2BP), transcript variant 1, mRNA. |
| <a href="#">5</a>                                                               | <a href="#">NM_000449</a>    | <a href="#">All miRNA predictions</a>   | 10.29        | <a href="#">hsa-miR-125a</a> | <a href="#">Genome browser</a>                                        | Homo sapiens regulatory factor X, 5 (influences HLA class II expression) (RFX5), mRNA.                                              |
| <a href="#">6</a>                                                               | <a href="#">NM_015094</a>    | <a href="#">All miRNA predictions</a>   | 10.14        | <a href="#">hsa-miR-125a</a> | <a href="#">Genome browser</a>                                        | Homo sapiens hypermethylated in cancer 2 (HIC2), mRNA.                                                                              |
| <a href="#">7</a>                                                               | <a href="#">NM_152283</a>    | <a href="#">All miRNA predictions</a>   | 10.11        | <a href="#">hsa-miR-125a</a> | <a href="#">Genome browser</a>                                        | Homo sapiens zinc finger protein 62 homolog (mouse) (ZFP62), mRNA.                                                                  |
| <a href="#">8</a>                                                               | <a href="#">NM_015898</a>    | <a href="#">All miRNA predictions</a>   | 9.80         | <a href="#">hsa-miR-125a</a> | <a href="#">Genome browser</a>                                        | Homo sapiens zinc finger and BTB domain containing 7 (ZBTB7), mRNA.                                                                 |
| <a href="#">9</a>                                                               | <a href="#">NM_002537</a>    | <a href="#">All miRNA predictions</a>   | 9.11         | <a href="#">hsa-miR-125a</a> | <a href="#">Genome browser</a>                                        | Homo sapiens ornithine decarboxylase antizyme 2 (OAZ2), mRNA.                                                                       |
| <a href="#">10</a>                                                              | <a href="#">NM_178007</a>    | <a href="#">All miRNA predictions</a>   | 8.92         | <a href="#">hsa-miR-125a</a> | <a href="#">Genome browser</a>                                        | Homo sapiens START domain containing 13 (STARD13), transcript variant beta, mRNA.                                                   |
| <a href="#">11</a>                                                              | <a href="#">NM_178006</a>    | <a href="#">All miRNA predictions</a>   | 8.92         | <a href="#">hsa-miR-125a</a> | <a href="#">Genome browser</a>                                        | Homo sapiens START domain containing 13 (STARD13), transcript variant alpha, mRNA.                                                  |
| <a href="#">12</a>                                                              | <a href="#">NM_052851</a>    | <a href="#">All miRNA predictions</a>   | 8.92         | <a href="#">hsa-miR-125a</a> | <a href="#">Genome browser</a>                                        | Homo sapiens START domain containing 13 (STARD13), transcript variant gamma, mRNA.                                                  |
| <a href="#">13</a>                                                              | <a href="#">NM_033503</a>    | <a href="#">All miRNA predictions</a>   | 8.91         | <a href="#">hsa-miR-125a</a> | <a href="#">Genome browser</a>                                        | Homo sapiens Bcl2 modifying factor (BMF), transcript variant 2, mRNA.                                                               |
| <a href="#">14</a>                                                              | <a href="#">NM_001003940</a> | <a href="#">All miRNA predictions</a>   | 8.91         | <a href="#">hsa-miR-125a</a> | <a href="#">Genome browser</a>                                        | Homo sapiens Bcl2 modifying factor (BMF), transcript variant 1, mRNA.                                                               |
| <a href="#">15</a>                                                              | <a href="#">NM_001003942</a> | <a href="#">All miRNA predictions</a>   | 8.91         | <a href="#">hsa-miR-125a</a> | <a href="#">Genome browser</a>                                        | Homo sapiens Bcl2 modifying factor (BMF), transcript variant 3, mRNA.                                                               |
| <a href="#">16</a>                                                              | <a href="#">NM_001003943</a> | <a href="#">All miRNA predictions</a>   | 8.90         | <a href="#">hsa-miR-125a</a> | <a href="#">Genome browser</a>                                        | Homo sapiens Bcl2 modifying factor (BMF), transcript variant 4, mRNA.                                                               |
| <a href="#">17</a>                                                              | <a href="#">NM_004947</a>    | <a href="#">All miRNA predictions</a>   | 8.67         | <a href="#">hsa-miR-125a</a> | <a href="#">Genome browser</a>                                        | Homo sapiens dedicator of cytokinesis 3 (DOCK3), mRNA.                                                                              |

|                    |                           |                                       |      |                              |                                |                                                                                                                                 |
|--------------------|---------------------------|---------------------------------------|------|------------------------------|--------------------------------|---------------------------------------------------------------------------------------------------------------------------------|
| <a href="#">18</a> | <a href="#">NM_033387</a> | <a href="#">All miRNA predictions</a> | 8.27 | <a href="#">hsa-miR-125a</a> | <a href="#">Genome browser</a> | Homo sapiens chromosome 9 open reading frame 59 (C9orf59), mRNA.                                                                |
| <a href="#">19</a> | <a href="#">NM_014674</a> | <a href="#">All miRNA predictions</a> | 7.73 | <a href="#">hsa-miR-125a</a> | <a href="#">Genome browser</a> | Homo sapiens ER degradation enhancer, mannosidase alpha-like 1 (EDEM1), mRNA.                                                   |
| <a href="#">20</a> | <a href="#">NM_022484</a> | <a href="#">All miRNA predictions</a> | 7.72 | <a href="#">hsa-miR-125a</a> | <a href="#">Genome browser</a> | Homo sapiens hypothetical protein FLJ13576 (FLJ13576), mRNA.                                                                    |
| <a href="#">21</a> | <a href="#">NM_138769</a> | <a href="#">All miRNA predictions</a> | 7.69 | <a href="#">hsa-miR-125a</a> | <a href="#">Genome browser</a> | Homo sapiens ras homolog gene family, member T2 (RHOT2), mRNA.                                                                  |
| <a href="#">22</a> | <a href="#">NM_004283</a> | <a href="#">All miRNA predictions</a> | 7.63 | <a href="#">hsa-miR-125a</a> | <a href="#">Genome browser</a> | Homo sapiens RAB3D, member RAS oncogene family (RAB3D), mRNA.                                                                   |
| <a href="#">23</a> | <a href="#">NM_022465</a> | <a href="#">All miRNA predictions</a> | 7.43 | <a href="#">hsa-miR-125a</a> | <a href="#">Genome browser</a> | Homo sapiens zinc finger protein, subfamily 1A, 4 (Eos) (ZNFN1A4), mRNA.                                                        |
| <a href="#">24</a> | <a href="#">NM_052830</a> | <a href="#">All miRNA predictions</a> | 7.35 | <a href="#">hsa-miR-125a</a> | <a href="#">Genome browser</a> | Homo sapiens gamma-glutamyltransferase-like 3 (GGTL3), transcript variant 1, mRNA.                                              |
| <a href="#">25</a> | <a href="#">NM_012429</a> | <a href="#">All miRNA predictions</a> | 7.28 | <a href="#">hsa-miR-125a</a> | <a href="#">Genome browser</a> | Homo sapiens SEC14-like 2 (S. cerevisiae) (SEC14L2), mRNA.                                                                      |
| <a href="#">26</a> | <a href="#">NM_032560</a> | <a href="#">All miRNA predictions</a> | 7.23 | <a href="#">hsa-miR-125a</a> | <a href="#">Genome browser</a> | Homo sapiens KIAA2010 (KIAA2010), transcript variant 1, mRNA.                                                                   |
| <a href="#">27</a> | <a href="#">NM_007345</a> | <a href="#">All miRNA predictions</a> | 7.23 | <a href="#">hsa-miR-125a</a> | <a href="#">Genome browser</a> | Homo sapiens zinc finger protein 236 (ZNF236), mRNA.                                                                            |
| <a href="#">28</a> | <a href="#">NM_004869</a> | <a href="#">All miRNA predictions</a> | 7.17 | <a href="#">hsa-miR-125a</a> | <a href="#">Genome browser</a> | Homo sapiens vacuolar protein sorting 4B (yeast) (VPS4B), mRNA.                                                                 |
| <a href="#">29</a> | <a href="#">NM_003077</a> | <a href="#">All miRNA predictions</a> | 7.08 | <a href="#">hsa-miR-125a</a> | <a href="#">Genome browser</a> | Homo sapiens SWI/SNF related, matrix associated, actin dependent regulator of chromatin, subfamily d, member 2 (SMARCD2), mRNA. |
| <a href="#">30</a> | <a href="#">NM_002442</a> | <a href="#">All miRNA predictions</a> | 7.08 | <a href="#">hsa-miR-125a</a> | <a href="#">Genome browser</a> | Homo sapiens musashi homolog 1 (Drosophila) (MSI1), mRNA.                                                                       |
| <a href="#">31</a> | <a href="#">NM_014521</a> | <a href="#">All miRNA predictions</a> | 7.00 | <a href="#">hsa-miR-125a</a> | <a href="#">Genome browser</a> | Homo sapiens SH3-domain binding protein 4 (SH3BP4), mRNA.                                                                       |
| <a href="#">32</a> | <a href="#">NM_173217</a> | <a href="#">All miRNA predictions</a> | 6.83 | <a href="#">hsa-miR-125a</a> | <a href="#">Genome browser</a> | Homo sapiens sialyltransferase 1 (beta-galactoside alpha-2,6-sialyltransferase) (SIAT1), transcript variant 3, mRNA.            |
| <a href="#">33</a> | <a href="#">NM_173216</a> | <a href="#">All miRNA predictions</a> | 6.83 | <a href="#">hsa-miR-125a</a> | <a href="#">Genome browser</a> | Homo sapiens sialyltransferase 1 (beta-galactoside alpha-2,6-sialyltransferase) (SIAT1), transcript variant 1, mRNA.            |
| <a href="#">34</a> | <a href="#">NM_003032</a> | <a href="#">All miRNA predictions</a> | 6.83 | <a href="#">hsa-miR-125a</a> | <a href="#">Genome browser</a> | Homo sapiens sialyltransferase 1 (beta-galactoside alpha-2,6-sialyltransferase) (SIAT1), transcript variant 2, mRNA.            |
| <a href="#">35</a> | <a href="#">NM_005940</a> | <a href="#">All miRNA predictions</a> | 6.78 | <a href="#">hsa-miR-125a</a> | <a href="#">Genome browser</a> | Homo sapiens matrix metalloproteinase 11 (stromelysin 3) (MMP11), mRNA.                                                         |
| <a href="#">36</a> | <a href="#">NM_020778</a> | <a href="#">All miRNA predictions</a> | 6.66 | <a href="#">hsa-miR-125a</a> | <a href="#">Genome browser</a> | Homo sapiens likely ortholog of mouse myocytic induction/differentiation originator (MIDORI), mRNA.                             |
| <a href="#">37</a> | <a href="#">NM_005688</a> | <a href="#">All miRNA predictions</a> | 6.63 | <a href="#">hsa-miR-125a</a> | <a href="#">Genome browser</a> | Homo sapiens ATP-binding cassette, sub-family C (CFTR/MRP), member 5 (ABCC5), mRNA.                                             |
| <a href="#">38</a> | <a href="#">NM_005876</a> | <a href="#">All miRNA predictions</a> | 6.49 | <a href="#">hsa-miR-125a</a> | <a href="#">Genome browser</a> | Homo sapiens aortic preferentially expressed protein 1 (APEG1), mRNA.                                                           |
| <a href="#">39</a> | <a href="#">NM_005397</a> | <a href="#">All miRNA predictions</a> | 6.46 | <a href="#">hsa-miR-125a</a> | <a href="#">Genome browser</a> | Homo sapiens podocalyxin-like (PODXL), mRNA.                                                                                    |
| <a href="#">40</a> | <a href="#">NM_013368</a> | <a href="#">All miRNA predictions</a> | 6.44 | <a href="#">hsa-miR-125a</a> | <a href="#">Genome browser</a> | Homo sapiens SERTA domain containing 3 (SERTAD3), transcript variant 1, mRNA.                                                   |
| <a href="#">41</a> | <a href="#">NM_203344</a> | <a href="#">All miRNA predictions</a> | 6.44 | <a href="#">hsa-miR-125a</a> | <a href="#">Genome browser</a> | Homo sapiens SERTA domain containing 3 (SERTAD3), transcript variant 2, mRNA.                                                   |
| <a href="#">42</a> | <a href="#">NM_016097</a> | <a href="#">All miRNA predictions</a> | 6.42 | <a href="#">hsa-miR-125a</a> | <a href="#">Genome browser</a> | Homo sapiens immediate early response 3 interacting protein 1 (IER3IP1), mRNA.                                                  |
| <a href="#">43</a> | <a href="#">NM_178026</a> | <a href="#">All miRNA predictions</a> | 6.40 | <a href="#">hsa-miR-125a</a> | <a href="#">Genome browser</a> | Homo sapiens gamma-glutamyltransferase-like 3 (GGTL3), transcript variant 3, mRNA.                                              |
| <a href="#">44</a> | <a href="#">NM_172217</a> | <a href="#">All miRNA predictions</a> | 6.40 | <a href="#">hsa-miR-125a</a> | <a href="#">Genome browser</a> | Homo sapiens interleukin 16 (lymphocyte chemoattractant factor) (IL16), transcript variant 2, mRNA.                             |
| <a href="#">45</a> | <a href="#">NM_175709</a> | <a href="#">All miRNA predictions</a> | 6.35 | <a href="#">hsa-miR-125a</a> | <a href="#">Genome browser</a> | Homo sapiens chromobox homolog 7 (CBX7), mRNA.                                                                                  |
| <a href="#">46</a> | <a href="#">NM_020770</a> | <a href="#">All miRNA predictions</a> | 6.33 | <a href="#">hsa-miR-125a</a> | <a href="#">Genome browser</a> | Homo sapiens cingulin (CGN), mRNA.                                                                                              |
| <a href="#">47</a> | <a href="#">NM_000212</a> | <a href="#">All miRNA predictions</a> | 6.25 | <a href="#">hsa-miR-125a</a> | <a href="#">Genome browser</a> | Homo sapiens integrin, beta 3 (platelet glycoprotein IIIa, antigen CD61) (ITGB3), mRNA.                                         |
| <a href="#">48</a> | <a href="#">NM_016577</a> | <a href="#">All miRNA</a>             | 6.25 | <a href="#">hsa-miR-</a>     | <a href="#">Genome</a>         | Homo sapiens RAB6B, member RAS oncogene family                                                                                  |

|                    |                           | <a href="#">predictions</a>           |      | <a href="#">125a</a>         | <a href="#">browser</a>        | (RAB6B), mRNA.                                                                                                                            |
|--------------------|---------------------------|---------------------------------------|------|------------------------------|--------------------------------|-------------------------------------------------------------------------------------------------------------------------------------------|
| <a href="#">49</a> | <a href="#">NM_004656</a> | <a href="#">All miRNA predictions</a> | 6.25 | <a href="#">hsa-miR-125a</a> | <a href="#">Genome browser</a> | Homo sapiens BRCA1 associated protein-1 (ubiquitin carboxy-terminal hydrolase) (BAP1), mRNA.                                              |
| <a href="#">50</a> | <a href="#">NM_003326</a> | <a href="#">All miRNA predictions</a> | 6.05 | <a href="#">hsa-miR-125a</a> | <a href="#">Genome browser</a> | Homo sapiens tumor necrosis factor (ligand) superfamily, member 4 (tax-transcriptionally activated glycoprotein 1, 34kDa) (TNFSF4), mRNA. |
| <a href="#">51</a> | <a href="#">NM_032242</a> | <a href="#">All miRNA predictions</a> | 5.67 | <a href="#">hsa-miR-125a</a> | <a href="#">Genome browser</a> | Homo sapiens plexin A1 (PLXNA1), mRNA.                                                                                                    |
| <a href="#">52</a> | <a href="#">NM_020777</a> | <a href="#">All miRNA predictions</a> | 5.54 | <a href="#">hsa-miR-125a</a> | <a href="#">Genome browser</a> | Homo sapiens sortilin-related VPS10 domain containing receptor 2 (SORCS2), mRNA.                                                          |
| <a href="#">53</a> | <a href="#">NM_178126</a> | <a href="#">All miRNA predictions</a> | 5.49 | <a href="#">hsa-miR-125a</a> | <a href="#">Genome browser</a> | Homo sapiens hypothetical protein LOC162427 (LOC162427), mRNA.                                                                            |
| <a href="#">54</a> | <a href="#">NM_004423</a> | <a href="#">All miRNA predictions</a> | 5.46 | <a href="#">hsa-miR-125a</a> | <a href="#">Genome browser</a> | Homo sapiens dishevelled, dsh homolog 3 (Drosophila) (DVL3), mRNA.                                                                        |
| <a href="#">55</a> | <a href="#">NM_015995</a> | <a href="#">All miRNA predictions</a> | 5.44 | <a href="#">hsa-miR-125a</a> | <a href="#">Genome browser</a> | Homo sapiens Kruppel-like factor 13 (KLF13), mRNA.                                                                                        |
| <a href="#">56</a> | <a href="#">NM_001150</a> | <a href="#">All miRNA predictions</a> | 5.42 | <a href="#">hsa-miR-125a</a> | <a href="#">Genome browser</a> | Homo sapiens alanyl (membrane) aminopeptidase (aminopeptidase N, aminopeptidase M, microsomal aminopeptidase, CD13, p150) (ANPEP), mRNA.  |
| <a href="#">57</a> | <a href="#">NM_012069</a> | <a href="#">All miRNA predictions</a> | 5.42 | <a href="#">hsa-miR-125a</a> | <a href="#">Genome browser</a> | Homo sapiens ATPase, (Na <sup>+</sup> )/K <sup>+</sup> transporting, beta 4 polypeptide (ATP1B4), mRNA.                                   |
| <a href="#">58</a> | <a href="#">NM_014369</a> | <a href="#">All miRNA predictions</a> | 5.39 | <a href="#">hsa-miR-125a</a> | <a href="#">Genome browser</a> | Homo sapiens protein tyrosine phosphatase, non-receptor type 18 (brain-derived) (PTPN18), mRNA.                                           |
| <a href="#">59</a> | <a href="#">NM_007243</a> | <a href="#">All miRNA predictions</a> | 5.35 | <a href="#">hsa-miR-125a</a> | <a href="#">Genome browser</a> | Homo sapiens nurim (nuclear envelope membrane protein) (NRM), mRNA.                                                                       |
| <a href="#">60</a> | <a href="#">NM_006133</a> | <a href="#">All miRNA predictions</a> | 5.34 | <a href="#">hsa-miR-125a</a> | <a href="#">Genome browser</a> | Homo sapiens chromosome 11 open reading frame 11 (C11orf11), mRNA.                                                                        |
| <a href="#">61</a> | <a href="#">NM_004451</a> | <a href="#">All miRNA predictions</a> | 5.18 | <a href="#">hsa-miR-125a</a> | <a href="#">Genome browser</a> | Homo sapiens estrogen-related receptor alpha (ESRRA), mRNA.                                                                               |
| <a href="#">62</a> | <a href="#">NM_003901</a> | <a href="#">All miRNA predictions</a> | 5.11 | <a href="#">hsa-miR-125a</a> | <a href="#">Genome browser</a> | Homo sapiens sphingosine-1-phosphate lyase 1 (SGPL1), mRNA.                                                                               |
| <a href="#">63</a> | <a href="#">NM_005637</a> | <a href="#">All miRNA predictions</a> | 5.10 | <a href="#">hsa-miR-125a</a> | <a href="#">Genome browser</a> | Homo sapiens synovial sarcoma translocation, chromosome 18 (SS18), transcript variant 2, mRNA.                                            |
| <a href="#">64</a> | <a href="#">NM_022918</a> | <a href="#">All miRNA predictions</a> | 5.08 | <a href="#">hsa-miR-125a</a> | <a href="#">Genome browser</a> | Homo sapiens hypothetical protein FLJ22104 (FLJ22104), mRNA.                                                                              |
| <a href="#">65</a> | <a href="#">NM_080621</a> | <a href="#">All miRNA predictions</a> | 5.08 | <a href="#">hsa-miR-125a</a> | <a href="#">Genome browser</a> | Homo sapiens sterile alpha motif domain containing 10 (SAMD10), mRNA.                                                                     |
| <a href="#">66</a> | <a href="#">NM_004470</a> | <a href="#">All miRNA predictions</a> | 5.00 | <a href="#">hsa-miR-125a</a> | <a href="#">Genome browser</a> | Homo sapiens FK506 binding protein 2, 13kDa (FKBP2), transcript variant 1, mRNA.                                                          |
| <a href="#">67</a> | <a href="#">NM_057092</a> | <a href="#">All miRNA predictions</a> | 5.00 | <a href="#">hsa-miR-125a</a> | <a href="#">Genome browser</a> | Homo sapiens FK506 binding protein 2, 13kDa (FKBP2), transcript variant 2, mRNA.                                                          |
| <a href="#">68</a> | <a href="#">NM_014690</a> | <a href="#">All miRNA predictions</a> | 4.99 | <a href="#">hsa-miR-125a</a> | <a href="#">Genome browser</a> | Homo sapiens KIAA0773 gene product (KIAA0773), mRNA.                                                                                      |
| <a href="#">69</a> | <a href="#">NM_003983</a> | <a href="#">All miRNA predictions</a> | 4.97 | <a href="#">hsa-miR-125a</a> | <a href="#">Genome browser</a> | Homo sapiens solute carrier family 7 (cationic amino acid transporter, y <sup>+</sup> system), member 6 (SLC7A6), mRNA.                   |
| <a href="#">70</a> | <a href="#">NM_003893</a> | <a href="#">All miRNA predictions</a> | 4.94 | <a href="#">hsa-miR-125a</a> | <a href="#">Genome browser</a> | Homo sapiens LIM domain binding 1 (LDB1), mRNA.                                                                                           |
| <a href="#">71</a> | <a href="#">NM_138340</a> | <a href="#">All miRNA predictions</a> | 4.91 | <a href="#">hsa-miR-125a</a> | <a href="#">Genome browser</a> | Homo sapiens abhydrolase domain containing 3 (ABHD3), mRNA.                                                                               |
| <a href="#">72</a> | <a href="#">NM_032857</a> | <a href="#">All miRNA predictions</a> | 4.90 | <a href="#">hsa-miR-125a</a> | <a href="#">Genome browser</a> | Homo sapiens lactamase, beta (LACTB), nuclear gene encoding mitochondrial protein, transcript variant 1, mRNA.                            |
| <a href="#">73</a> | <a href="#">NM_002568</a> | <a href="#">All miRNA predictions</a> | 4.90 | <a href="#">hsa-miR-125a</a> | <a href="#">Genome browser</a> | Homo sapiens poly(A) binding protein, cytoplasmic 1 (PABPC1), mRNA.                                                                       |
| <a href="#">74</a> | <a href="#">NM_015899</a> | <a href="#">All miRNA predictions</a> | 4.88 | <a href="#">hsa-miR-125a</a> | <a href="#">Genome browser</a> | Homo sapiens pleckstrin homology domain containing, family A (phosphoinositide binding specific) member 9 (PLEKHA9), mRNA.                |
| <a href="#">75</a> | <a href="#">NM_004095</a> | <a href="#">All miRNA predictions</a> | 4.87 | <a href="#">hsa-miR-125a</a> | <a href="#">Genome browser</a> | Homo sapiens eukaryotic translation initiation factor 4E binding protein 1 (EIF4EBP1), mRNA.                                              |
| <a href="#">76</a> | <a href="#">NM_033272</a> | <a href="#">All miRNA predictions</a> | 4.86 | <a href="#">hsa-miR-125a</a> | <a href="#">Genome browser</a> | Homo sapiens potassium voltage-gated channel, subfamily H (eag-related), member 7 (KCNH7), transcript variant 1, mRNA.                    |
| <a href="#">77</a> | <a href="#">NM_020309</a> | <a href="#">All miRNA predictions</a> | 4.86 | <a href="#">hsa-miR-125a</a> | <a href="#">Genome browser</a> | Homo sapiens solute carrier family 17 (sodium-dependent inorganic phosphate cotransporter),                                               |

|                     |                              |                                       |      |                              |                                | member 7 (SLC17A7), mRNA.                                                                                                                                                                             |
|---------------------|------------------------------|---------------------------------------|------|------------------------------|--------------------------------|-------------------------------------------------------------------------------------------------------------------------------------------------------------------------------------------------------|
| <a href="#">78</a>  | <a href="#">NM_199054</a>    | <a href="#">All miRNA predictions</a> | 4.84 | <a href="#">hsa-miR-125a</a> | <a href="#">Genome browser</a> | Homo sapiens MAP kinase interacting serine/threonine kinase 2 (MKNK2), mRNA.                                                                                                                          |
| <a href="#">79</a>  | <a href="#">NM_004901</a>    | <a href="#">All miRNA predictions</a> | 4.84 | <a href="#">hsa-miR-125a</a> | <a href="#">Genome browser</a> | Homo sapiens ectonucleoside triphosphate diphosphohydrolase 4 (ENTPD4), mRNA.                                                                                                                         |
| <a href="#">80</a>  | <a href="#">NM_014871</a>    | <a href="#">All miRNA predictions</a> | 4.84 | <a href="#">hsa-miR-125a</a> | <a href="#">Genome browser</a> | Homo sapiens ubiquitin specific protease 52 (USP52), mRNA.                                                                                                                                            |
| <a href="#">81</a>  | <a href="#">NM_004073</a>    | <a href="#">All miRNA predictions</a> | 4.82 | <a href="#">hsa-miR-125a</a> | <a href="#">Genome browser</a> | Homo sapiens polo-like kinase 3 (Drosophila) (PLK3), mRNA.                                                                                                                                            |
| <a href="#">82</a>  | <a href="#">NM_003427</a>    | <a href="#">All miRNA predictions</a> | 4.81 | <a href="#">hsa-miR-125a</a> | <a href="#">Genome browser</a> | Homo sapiens zinc finger protein 76 (expressed in testis) (ZNF76), mRNA.                                                                                                                              |
| <a href="#">83</a>  | <a href="#">NM_030645</a>    | <a href="#">All miRNA predictions</a> | 4.81 | <a href="#">hsa-miR-125a</a> | <a href="#">Genome browser</a> | Homo sapiens KIAA1720 protein (KIAA1720), mRNA.                                                                                                                                                       |
| <a href="#">84</a>  | <a href="#">NM_032325</a>    | <a href="#">All miRNA predictions</a> | 4.75 | <a href="#">hsa-miR-125a</a> | <a href="#">Genome browser</a> | Homo sapiens hypothetical protein MGC11102 (MGC11102), mRNA.                                                                                                                                          |
| <a href="#">85</a>  | <a href="#">NM_022778</a>    | <a href="#">All miRNA predictions</a> | 4.70 | <a href="#">hsa-miR-125a</a> | <a href="#">Genome browser</a> | Homo sapiens hypothetical protein DKFZp434L0117 (DKFZP434L0117), mRNA.                                                                                                                                |
| <a href="#">86</a>  | <a href="#">NM_003211</a>    | <a href="#">All miRNA predictions</a> | 4.67 | <a href="#">hsa-miR-125a</a> | <a href="#">Genome browser</a> | Homo sapiens thymine-DNA glycosylase (TDG), mRNA.                                                                                                                                                     |
| <a href="#">87</a>  | <a href="#">NM_005176</a>    | <a href="#">All miRNA predictions</a> | 4.63 | <a href="#">hsa-miR-125a</a> | <a href="#">Genome browser</a> | Homo sapiens ATP synthase, H <sup>+</sup> transporting, mitochondrial F0 complex, subunit c (subunit 9), isoform 2 (ATP5G2), nuclear gene encoding mitochondrial protein, transcript variant 2, mRNA. |
| <a href="#">88</a>  | <a href="#">NM_001070</a>    | <a href="#">All miRNA predictions</a> | 4.63 | <a href="#">hsa-miR-125a</a> | <a href="#">Genome browser</a> | Homo sapiens tubulin, gamma 1 (TUBG1), mRNA.                                                                                                                                                          |
| <a href="#">89</a>  | <a href="#">NM_001002031</a> | <a href="#">All miRNA predictions</a> | 4.63 | <a href="#">hsa-miR-125a</a> | <a href="#">Genome browser</a> | Homo sapiens ATP synthase, H <sup>+</sup> transporting, mitochondrial F0 complex, subunit c (subunit 9), isoform 2 (ATP5G2), nuclear gene encoding mitochondrial protein, transcript variant 1, mRNA. |
| <a href="#">90</a>  | <a href="#">NM_024789</a>    | <a href="#">All miRNA predictions</a> | 4.60 | <a href="#">hsa-miR-125a</a> | <a href="#">Genome browser</a> | Homo sapiens chromosome 10 open reading frame 77 (C10orf77), mRNA.                                                                                                                                    |
| <a href="#">91</a>  | <a href="#">NM_178441</a>    | <a href="#">All miRNA predictions</a> | 4.58 | <a href="#">hsa-miR-125a</a> | <a href="#">Genome browser</a> | Homo sapiens zinc finger, FYVE domain containing 1 (ZFYVE1), transcript variant 2, mRNA.                                                                                                              |
| <a href="#">92</a>  | <a href="#">NM_021260</a>    | <a href="#">All miRNA predictions</a> | 4.58 | <a href="#">hsa-miR-125a</a> | <a href="#">Genome browser</a> | Homo sapiens zinc finger, FYVE domain containing 1 (ZFYVE1), transcript variant 1, mRNA.                                                                                                              |
| <a href="#">93</a>  | <a href="#">NM_207335</a>    | <a href="#">All miRNA predictions</a> | 4.58 | <a href="#">hsa-miR-125a</a> | <a href="#">Genome browser</a> | Homo sapiens FLJ46299 protein (FLJ46299), mRNA.                                                                                                                                                       |
| <a href="#">94</a>  | <a href="#">NM_024923</a>    | <a href="#">All miRNA predictions</a> | 4.57 | <a href="#">hsa-miR-125a</a> | <a href="#">Genome browser</a> | Homo sapiens nucleoporin 210kDa (NUP210), mRNA.                                                                                                                                                       |
| <a href="#">95</a>  | <a href="#">NM_006481</a>    | <a href="#">All miRNA predictions</a> | 4.55 | <a href="#">hsa-miR-125a</a> | <a href="#">Genome browser</a> | Homo sapiens transcription factor 2, hepatic; LF-B3; variant hepatic nuclear factor (TCF2), transcript variant b, mRNA.                                                                               |
| <a href="#">96</a>  | <a href="#">NM_015288</a>    | <a href="#">All miRNA predictions</a> | 4.54 | <a href="#">hsa-miR-125a</a> | <a href="#">Genome browser</a> | Homo sapiens PHD finger protein 15 (PHF15), mRNA.                                                                                                                                                     |
| <a href="#">97</a>  | <a href="#">NM_181313</a>    | <a href="#">All miRNA predictions</a> | 4.51 | <a href="#">hsa-miR-125a</a> | <a href="#">Genome browser</a> | Homo sapiens tafazzin (cardiomyopathy, dilated 3A (X-linked); endocardial fibroelastosis 2; Barth syndrome) (TAZ), transcript variant 4, mRNA.                                                        |
| <a href="#">98</a>  | <a href="#">NM_000116</a>    | <a href="#">All miRNA predictions</a> | 4.51 | <a href="#">hsa-miR-125a</a> | <a href="#">Genome browser</a> | Homo sapiens tafazzin (cardiomyopathy, dilated 3A (X-linked); endocardial fibroelastosis 2; Barth syndrome) (TAZ), transcript variant 1, mRNA.                                                        |
| <a href="#">99</a>  | <a href="#">NM_181312</a>    | <a href="#">All miRNA predictions</a> | 4.51 | <a href="#">hsa-miR-125a</a> | <a href="#">Genome browser</a> | Homo sapiens tafazzin (cardiomyopathy, dilated 3A (X-linked); endocardial fibroelastosis 2; Barth syndrome) (TAZ), transcript variant 3, mRNA.                                                        |
| <a href="#">100</a> | <a href="#">NM_181311</a>    | <a href="#">All miRNA predictions</a> | 4.51 | <a href="#">hsa-miR-125a</a> | <a href="#">Genome browser</a> | Homo sapiens tafazzin (cardiomyopathy, dilated 3A (X-linked); endocardial fibroelastosis 2; Barth syndrome) (TAZ), transcript variant 2, mRNA.                                                        |
| <a href="#">101</a> | <a href="#">NM_016538</a>    | <a href="#">All miRNA predictions</a> | 4.51 | <a href="#">hsa-miR-125a</a> | <a href="#">Genome browser</a> | Homo sapiens sirtuin (silent mating type information regulation 2 homolog) 7 ( <i>S. cerevisiae</i> ) (SIRT7), mRNA.                                                                                  |
| <a href="#">102</a> | <a href="#">NM_016147</a>    | <a href="#">All miRNA predictions</a> | 4.47 | <a href="#">hsa-miR-125a</a> | <a href="#">Genome browser</a> | Homo sapiens protein phosphatase methylesterase-1 (PME-1), mRNA.                                                                                                                                      |
| <a href="#">103</a> | <a href="#">NM_198925</a>    | <a href="#">All miRNA predictions</a> | 4.46 | <a href="#">hsa-miR-125a</a> | <a href="#">Genome browser</a> | Homo sapiens sema domain, immunoglobulin domain (Ig), transmembrane domain (TM) and short cytoplasmic domain, (semaphorin) 4B (SEMA4B), transcript variant 2, mRNA.                                   |
| <a href="#">104</a> | <a href="#">NM_020210</a>    | <a href="#">All miRNA</a>             | 4.46 | <a href="#">hsa-miR-</a>     | <a href="#">Genome</a>         | Homo sapiens sema domain, immunoglobulin                                                                                                                                                              |

|                     |                              | <a href="#">predictions</a>           |      | <a href="#">125a</a>         | <a href="#">browser</a>        |                                                                                                                                                                          |
|---------------------|------------------------------|---------------------------------------|------|------------------------------|--------------------------------|--------------------------------------------------------------------------------------------------------------------------------------------------------------------------|
|                     |                              |                                       |      |                              |                                | domain (Ig), transmembrane domain (TM) and short cytoplasmic domain, (semaphorin) 4B (SEMA4B), transcript variant 1, mRNA.                                               |
| <a href="#">105</a> | <a href="#">NM_134440</a>    | <a href="#">All miRNA predictions</a> | 4.42 | <a href="#">hsa-miR-125a</a> | <a href="#">Genome browser</a> | Homo sapiens regulatory factor X-associated ankyrin-containing protein (RFXANK), transcript variant 2, mRNA.                                                             |
| <a href="#">106</a> | <a href="#">NM_003721</a>    | <a href="#">All miRNA predictions</a> | 4.42 | <a href="#">hsa-miR-125a</a> | <a href="#">Genome browser</a> | Homo sapiens regulatory factor X-associated ankyrin-containing protein (RFXANK), transcript variant 1, mRNA.                                                             |
| <a href="#">107</a> | <a href="#">NM_001655</a>    | <a href="#">All miRNA predictions</a> | 4.39 | <a href="#">hsa-miR-125a</a> | <a href="#">Genome browser</a> | Homo sapiens archain 1 (ARCN1), mRNA.                                                                                                                                    |
| <a href="#">108</a> | <a href="#">NM_198279</a>    | <a href="#">All miRNA predictions</a> | 4.39 | <a href="#">hsa-miR-125a</a> | <a href="#">Genome browser</a> | Homo sapiens chromosome X open reading frame 23 (CXorf23), mRNA.                                                                                                         |
| <a href="#">109</a> | <a href="#">NM_003924</a>    | <a href="#">All miRNA predictions</a> | 4.38 | <a href="#">hsa-miR-125a</a> | <a href="#">Genome browser</a> | Homo sapiens paired-like homeobox 2b (PHOX2B), mRNA.                                                                                                                     |
| <a href="#">110</a> | <a href="#">NM_016090</a>    | <a href="#">All miRNA predictions</a> | 4.37 | <a href="#">hsa-miR-125a</a> | <a href="#">Genome browser</a> | Homo sapiens RNA binding motif protein 7 (RBM7), mRNA.                                                                                                                   |
| <a href="#">111</a> | <a href="#">NM_033449</a>    | <a href="#">All miRNA predictions</a> | 4.36 | <a href="#">hsa-miR-125a</a> | <a href="#">Genome browser</a> | Homo sapiens FCH and double SH3 domains 1 (FCHSD1), mRNA.                                                                                                                |
| <a href="#">112</a> | <a href="#">NM_006454</a>    | <a href="#">All miRNA predictions</a> | 4.36 | <a href="#">hsa-miR-125a</a> | <a href="#">Genome browser</a> | Homo sapiens MAX dimerization protein 4 (MXD4), mRNA.                                                                                                                    |
| <a href="#">113</a> | <a href="#">NM_016436</a>    | <a href="#">All miRNA predictions</a> | 4.35 | <a href="#">hsa-miR-125a</a> | <a href="#">Genome browser</a> | Homo sapiens chromosome 20 open reading frame 104 (C20orf104), mRNA.                                                                                                     |
| <a href="#">114</a> | <a href="#">NM_002252</a>    | <a href="#">All miRNA predictions</a> | 4.31 | <a href="#">hsa-miR-125a</a> | <a href="#">Genome browser</a> | Homo sapiens potassium voltage-gated channel, delayed-rectifier, subfamily S, member 3 (KCNS3), mRNA.                                                                    |
| <a href="#">115</a> | <a href="#">NM_016399</a>    | <a href="#">All miRNA predictions</a> | 4.29 | <a href="#">hsa-miR-125a</a> | <a href="#">Genome browser</a> | Homo sapiens hypothetical protein HSPC132 (HSPC132), mRNA.                                                                                                               |
| <a href="#">116</a> | <a href="#">NM_014759</a>    | <a href="#">All miRNA predictions</a> | 4.26 | <a href="#">hsa-miR-125a</a> | <a href="#">Genome browser</a> | Homo sapiens phytanoyl-CoA hydroxylase interacting protein (PHYHIP), mRNA.                                                                                               |
| <a href="#">117</a> | <a href="#">NM_153267</a>    | <a href="#">All miRNA predictions</a> | 4.25 | <a href="#">hsa-miR-125a</a> | <a href="#">Genome browser</a> | Homo sapiens MAM domain containing 2 (MAMDC2), mRNA.                                                                                                                     |
| <a href="#">118</a> | <a href="#">NM_015292</a>    | <a href="#">All miRNA predictions</a> | 4.24 | <a href="#">hsa-miR-125a</a> | <a href="#">Genome browser</a> | Homo sapiens likely ortholog of mouse membrane bound C2 domain containing protein (MBC2), mRNA.                                                                          |
| <a href="#">119</a> | <a href="#">NM_152236</a>    | <a href="#">All miRNA predictions</a> | 4.21 | <a href="#">hsa-miR-125a</a> | <a href="#">Genome browser</a> | Homo sapiens growth arrest-specific 2 like 1 (GAS2L1), transcript variant 2, mRNA.                                                                                       |
| <a href="#">120</a> | <a href="#">NM_006478</a>    | <a href="#">All miRNA predictions</a> | 4.21 | <a href="#">hsa-miR-125a</a> | <a href="#">Genome browser</a> | Homo sapiens growth arrest-specific 2 like 1 (GAS2L1), transcript variant 1, mRNA.                                                                                       |
| <a href="#">121</a> | <a href="#">NM_153354</a>    | <a href="#">All miRNA predictions</a> | 4.19 | <a href="#">hsa-miR-125a</a> | <a href="#">Genome browser</a> | Homo sapiens hypothetical protein MGC33214 (MGC33214), mRNA.                                                                                                             |
| <a href="#">122</a> | <a href="#">NM_020453</a>    | <a href="#">All miRNA predictions</a> | 4.17 | <a href="#">hsa-miR-125a</a> | <a href="#">Genome browser</a> | Homo sapiens ATPase, Class V, type 10D (ATP10D), mRNA.                                                                                                                   |
| <a href="#">123</a> | <a href="#">NM_005238</a>    | <a href="#">All miRNA predictions</a> | 4.16 | <a href="#">hsa-miR-125a</a> | <a href="#">Genome browser</a> | Homo sapiens v-ets erythroblastosis virus E26 oncogene homolog 1 (avian) (ETS1), mRNA.                                                                                   |
| <a href="#">124</a> | <a href="#">NM_003369</a>    | <a href="#">All miRNA predictions</a> | 4.16 | <a href="#">hsa-miR-125a</a> | <a href="#">Genome browser</a> | Homo sapiens UV radiation resistance associated gene (UVRAG), mRNA.                                                                                                      |
| <a href="#">125</a> | <a href="#">NM_003605</a>    | <a href="#">All miRNA predictions</a> | 4.15 | <a href="#">hsa-miR-125a</a> | <a href="#">Genome browser</a> | Homo sapiens O-linked N-acetylglucosamine (GlcNAc) transferase (UDP-N-acetylglucosamine:polypeptide-N-acetylglucosaminyl transferase) (OGT), transcript variant 3, mRNA. |
| <a href="#">126</a> | <a href="#">NM_001001933</a> | <a href="#">All miRNA predictions</a> | 4.13 | <a href="#">hsa-miR-125a</a> | <a href="#">Genome browser</a> | Homo sapiens LIM homeobox 8 (LHX8), mRNA.                                                                                                                                |
| <a href="#">127</a> | <a href="#">NM_004716</a>    | <a href="#">All miRNA predictions</a> | 4.13 | <a href="#">hsa-miR-125a</a> | <a href="#">Genome browser</a> | Homo sapiens proprotein convertase subtilisin/kexin type 7 (PCSK7), mRNA.                                                                                                |
| <a href="#">128</a> | <a href="#">NM_005113</a>    | <a href="#">All miRNA predictions</a> | 4.13 | <a href="#">hsa-miR-125a</a> | <a href="#">Genome browser</a> | Homo sapiens golgi autoantigen, golgin subfamily a, 5 (GOLGA5), mRNA.                                                                                                    |
| <a href="#">129</a> | <a href="#">NM_005740</a>    | <a href="#">All miRNA predictions</a> | 4.13 | <a href="#">hsa-miR-125a</a> | <a href="#">Genome browser</a> | Homo sapiens dynein, axonemal, light polypeptide 4 (DNAL4), mRNA.                                                                                                        |
| <a href="#">130</a> | <a href="#">NM_015866</a>    | <a href="#">All miRNA predictions</a> | 4.13 | <a href="#">hsa-miR-125a</a> | <a href="#">Genome browser</a> | Homo sapiens PR domain containing 2, with ZNF domain (PRDM2), transcript variant 2, mRNA.                                                                                |
| <a href="#">131</a> | <a href="#">NM_005845</a>    | <a href="#">All miRNA predictions</a> | 4.09 | <a href="#">hsa-miR-125a</a> | <a href="#">Genome browser</a> | Homo sapiens ATP-binding cassette, sub-family C (CFTR/MRP), member 4 (ABCC4), mRNA.                                                                                      |
| <a href="#">132</a> | <a href="#">NM_002033</a>    | <a href="#">All miRNA predictions</a> | 4.09 | <a href="#">hsa-miR-125a</a> | <a href="#">Genome browser</a> | Homo sapiens fucosyltransferase 4 (alpha (1,3) fucosyltransferase, myeloid-specific) (FUT4), mRNA.                                                                       |
| <a href="#">133</a> | <a href="#">NM_004513</a>    | <a href="#">All miRNA predictions</a> | 4.07 | <a href="#">hsa-miR-125a</a> | <a href="#">Genome browser</a> | Homo sapiens interleukin 16 (lymphocyte chemoattractant factor) (IL16), transcript variant 1,                                                                            |

|                     |                           |                                       |      |                              |                                | mRNA.                                                                                                 |
|---------------------|---------------------------|---------------------------------------|------|------------------------------|--------------------------------|-------------------------------------------------------------------------------------------------------|
| <a href="#">134</a> | <a href="#">NM_207577</a> | <a href="#">All miRNA predictions</a> | 4.06 | <a href="#">hsa-miR-125a</a> | <a href="#">Genome browser</a> | Homo sapiens microtubule-associated protein 6 (MAP6), transcript variant 2, mRNA.                     |
| <a href="#">135</a> | <a href="#">NM_005576</a> | <a href="#">All miRNA predictions</a> | 4.03 | <a href="#">hsa-miR-125a</a> | <a href="#">Genome browser</a> | Homo sapiens lysyl oxidase-like 1 (LOXL1), mRNA.                                                      |
| <a href="#">136</a> | <a href="#">NM_024524</a> | <a href="#">All miRNA predictions</a> | 4.02 | <a href="#">hsa-miR-125a</a> | <a href="#">Genome browser</a> | Homo sapiens ATPase family homolog up-regulated in senescence cells (AFURS1), mRNA.                   |
| <a href="#">137</a> | <a href="#">NM_005439</a> | <a href="#">All miRNA predictions</a> | 4.02 | <a href="#">hsa-miR-125a</a> | <a href="#">Genome browser</a> | Homo sapiens myeloid leukemia factor 2 (MLF2), mRNA.                                                  |
| <a href="#">138</a> | <a href="#">NM_133455</a> | <a href="#">All miRNA predictions</a> | 4.01 | <a href="#">hsa-miR-125a</a> | <a href="#">Genome browser</a> | Homo sapiens EMI domain containing 1 (EMID1), mRNA.                                                   |
| <a href="#">139</a> | <a href="#">NM_005575</a> | <a href="#">All miRNA predictions</a> | 4.01 | <a href="#">hsa-miR-125a</a> | <a href="#">Genome browser</a> | Homo sapiens leucyl/cystinyl aminopeptidase (LNPEP), mRNA.                                            |
| <a href="#">140</a> | <a href="#">NM_053029</a> | <a href="#">All miRNA predictions</a> | 4.01 | <a href="#">hsa-miR-125a</a> | <a href="#">Genome browser</a> | Homo sapiens myosin, light polypeptide kinase (MYLK), transcript variant 4, mRNA.                     |
| <a href="#">141</a> | <a href="#">NM_002959</a> | <a href="#">All miRNA predictions</a> | 3.99 | <a href="#">hsa-miR-125a</a> | <a href="#">Genome browser</a> | Homo sapiens sortilin 1 (SORT1), mRNA.                                                                |
| <a href="#">142</a> | <a href="#">NM_173514</a> | <a href="#">All miRNA predictions</a> | 3.99 | <a href="#">hsa-miR-125a</a> | <a href="#">Genome browser</a> | Homo sapiens hypothetical protein FLJ90709 (FLJ90709), mRNA.                                          |
| <a href="#">143</a> | <a href="#">NM_021213</a> | <a href="#">All miRNA predictions</a> | 3.98 | <a href="#">hsa-miR-125a</a> | <a href="#">Genome browser</a> | Homo sapiens phosphatidylcholine transfer protein (PCTP), mRNA.                                       |
| <a href="#">144</a> | <a href="#">NM_022140</a> | <a href="#">All miRNA predictions</a> | 3.94 | <a href="#">hsa-miR-125a</a> | <a href="#">Genome browser</a> | Homo sapiens erythrocyte membrane protein band 4.1 like 4A (EPB41L4A), mRNA.                          |
| <a href="#">145</a> | <a href="#">NM_019005</a> | <a href="#">All miRNA predictions</a> | 3.91 | <a href="#">hsa-miR-125a</a> | <a href="#">Genome browser</a> | Homo sapiens hypothetical protein FLJ20323 (FLJ20323), mRNA.                                          |
| <a href="#">146</a> | <a href="#">NM_002460</a> | <a href="#">All miRNA predictions</a> | 3.91 | <a href="#">hsa-miR-125a</a> | <a href="#">Genome browser</a> | Homo sapiens interferon regulatory factor 4 (IRF4), mRNA.                                             |
| <a href="#">147</a> | <a href="#">NM_018243</a> | <a href="#">All miRNA predictions</a> | 3.90 | <a href="#">hsa-miR-125a</a> | <a href="#">Genome browser</a> | Homo sapiens septin 11 (SEPT11), mRNA.                                                                |
| <a href="#">148</a> | <a href="#">NM_148907</a> | <a href="#">All miRNA predictions</a> | 3.87 | <a href="#">hsa-miR-125a</a> | <a href="#">Genome browser</a> | Homo sapiens oxysterol binding protein-like 9 (OSBPL9), transcript variant 4, mRNA.                   |
| <a href="#">149</a> | <a href="#">NM_148905</a> | <a href="#">All miRNA predictions</a> | 3.87 | <a href="#">hsa-miR-125a</a> | <a href="#">Genome browser</a> | Homo sapiens oxysterol binding protein-like 9 (OSBPL9), transcript variant 2, mRNA.                   |
| <a href="#">150</a> | <a href="#">NM_148904</a> | <a href="#">All miRNA predictions</a> | 3.87 | <a href="#">hsa-miR-125a</a> | <a href="#">Genome browser</a> | Homo sapiens oxysterol binding protein-like 9 (OSBPL9), transcript variant 1, mRNA.                   |
| <a href="#">151</a> | <a href="#">NM_024586</a> | <a href="#">All miRNA predictions</a> | 3.87 | <a href="#">hsa-miR-125a</a> | <a href="#">Genome browser</a> | Homo sapiens oxysterol binding protein-like 9 (OSBPL9), transcript variant 6, mRNA.                   |
| <a href="#">152</a> | <a href="#">NM_148909</a> | <a href="#">All miRNA predictions</a> | 3.87 | <a href="#">hsa-miR-125a</a> | <a href="#">Genome browser</a> | Homo sapiens oxysterol binding protein-like 9 (OSBPL9), transcript variant 7, mRNA.                   |
| <a href="#">153</a> | <a href="#">NM_005382</a> | <a href="#">All miRNA predictions</a> | 3.87 | <a href="#">hsa-miR-125a</a> | <a href="#">Genome browser</a> | Homo sapiens neurofilament 3 (150kDa medium) (NEF3), mRNA.                                            |
| <a href="#">154</a> | <a href="#">NM_148906</a> | <a href="#">All miRNA predictions</a> | 3.87 | <a href="#">hsa-miR-125a</a> | <a href="#">Genome browser</a> | Homo sapiens oxysterol binding protein-like 9 (OSBPL9), transcript variant 3, mRNA.                   |
| <a href="#">155</a> | <a href="#">NM_148908</a> | <a href="#">All miRNA predictions</a> | 3.87 | <a href="#">hsa-miR-125a</a> | <a href="#">Genome browser</a> | Homo sapiens oxysterol binding protein-like 9 (OSBPL9), transcript variant 5, mRNA.                   |
| <a href="#">156</a> | <a href="#">NM_024701</a> | <a href="#">All miRNA predictions</a> | 3.86 | <a href="#">hsa-miR-125a</a> | <a href="#">Genome browser</a> | Homo sapiens ankyrin repeat and SOCS box-containing 13 (ASB13), mRNA.                                 |
| <a href="#">157</a> | <a href="#">NM_015955</a> | <a href="#">All miRNA predictions</a> | 3.84 | <a href="#">hsa-miR-125a</a> | <a href="#">Genome browser</a> | Homo sapiens chromosome 2 open reading frame 4 (C2orf4), mRNA.                                        |
| <a href="#">158</a> | <a href="#">NM_022058</a> | <a href="#">All miRNA predictions</a> | 3.83 | <a href="#">hsa-miR-125a</a> | <a href="#">Genome browser</a> | Homo sapiens solute carrier family 4, sodium bicarbonate transporter-like, member 10 (SLC4A10), mRNA. |
| <a href="#">159</a> | <a href="#">NM_007260</a> | <a href="#">All miRNA predictions</a> | 3.81 | <a href="#">hsa-miR-125a</a> | <a href="#">Genome browser</a> | Homo sapiens lysophospholipase II (LYPLA2), mRNA.                                                     |
| <a href="#">160</a> | <a href="#">NM_207446</a> | <a href="#">All miRNA predictions</a> | 3.81 | <a href="#">hsa-miR-125a</a> | <a href="#">Genome browser</a> | Homo sapiens hypothetical gene supported by AK075564; BC060873 (LOC400451), mRNA.                     |
| <a href="#">161</a> | <a href="#">NM_000332</a> | <a href="#">All miRNA predictions</a> | 3.79 | <a href="#">hsa-miR-125a</a> | <a href="#">Genome browser</a> | Homo sapiens ataxin 1 (ATXN1), mRNA.                                                                  |
| <a href="#">162</a> | <a href="#">NM_015911</a> | <a href="#">All miRNA predictions</a> | 3.79 | <a href="#">hsa-miR-125a</a> | <a href="#">Genome browser</a> | Homo sapiens hypothetical protein LOC51058 (LOC51058), mRNA.                                          |
| <a href="#">163</a> | <a href="#">NM_000038</a> | <a href="#">All miRNA predictions</a> | 3.77 | <a href="#">hsa-miR-125a</a> | <a href="#">Genome browser</a> | Homo sapiens adenomatous polyposis coli (APC), mRNA.                                                  |
| <a href="#">164</a> | <a href="#">NM_032154</a> | <a href="#">All miRNA predictions</a> | 3.77 | <a href="#">hsa-miR-125a</a> | <a href="#">Genome browser</a> | Homo sapiens ring finger protein 134 (RNF134), mRNA.                                                  |
| <a href="#">165</a> | <a href="#">NM_023019</a> | <a href="#">All miRNA</a>             | 3.77 | <a href="#">hsa-miR-</a>     | <a href="#">Genome</a>         | Homo sapiens dynactin 1 (p150, glued homolog,                                                         |

|                     |                           | <a href="#">predictions</a>           |      | <a href="#">125a</a>         | <a href="#">browser</a>        |                                                                                                                                                |
|---------------------|---------------------------|---------------------------------------|------|------------------------------|--------------------------------|------------------------------------------------------------------------------------------------------------------------------------------------|
|                     |                           |                                       |      |                              |                                | Drosophila (DCTN1), transcript variant 2, mRNA.                                                                                                |
| <a href="#">166</a> | <a href="#">NM_152729</a> | <a href="#">All miRNA predictions</a> | 3.77 | <a href="#">hsa-miR-125a</a> | <a href="#">Genome browser</a> | Homo sapiens 5'-nucleotidase, cytosolic II-like 1 (NT5C2L1), mRNA.                                                                             |
| <a href="#">167</a> | <a href="#">NM_004082</a> | <a href="#">All miRNA predictions</a> | 3.77 | <a href="#">hsa-miR-125a</a> | <a href="#">Genome browser</a> | Homo sapiens dynactin 1 (p150, glued homolog, Drosophila) (DCTN1), transcript variant 1, mRNA.                                                 |
| <a href="#">168</a> | <a href="#">NM_003458</a> | <a href="#">All miRNA predictions</a> | 3.76 | <a href="#">hsa-miR-125a</a> | <a href="#">Genome browser</a> | Homo sapiens bassoon (presynaptic cytomatrix protein) (BSN), mRNA.                                                                             |
| <a href="#">169</a> | <a href="#">NM_002112</a> | <a href="#">All miRNA predictions</a> | 3.75 | <a href="#">hsa-miR-125a</a> | <a href="#">Genome browser</a> | Homo sapiens histidine decarboxylase (HDC), mRNA.                                                                                              |
| <a href="#">170</a> | <a href="#">NM_014771</a> | <a href="#">All miRNA predictions</a> | 3.75 | <a href="#">hsa-miR-125a</a> | <a href="#">Genome browser</a> | Homo sapiens ring finger protein 40 (RNF40), transcript variant 1, mRNA.                                                                       |
| <a href="#">171</a> | <a href="#">NM_001448</a> | <a href="#">All miRNA predictions</a> | 3.74 | <a href="#">hsa-miR-125a</a> | <a href="#">Genome browser</a> | Homo sapiens glypican 4 (GPC4), mRNA.                                                                                                          |
| <a href="#">172</a> | <a href="#">NM_024667</a> | <a href="#">All miRNA predictions</a> | 3.74 | <a href="#">hsa-miR-125a</a> | <a href="#">Genome browser</a> | Homo sapiens hypothetical protein FLJ12750 (FLJ12750), mRNA.                                                                                   |
| <a href="#">173</a> | <a href="#">NM_032701</a> | <a href="#">All miRNA predictions</a> | 3.71 | <a href="#">hsa-miR-125a</a> | <a href="#">Genome browser</a> | Homo sapiens suppressor of variegation 4-20 homolog 2 (Drosophila) (SUV420H2), mRNA.                                                           |
| <a href="#">174</a> | <a href="#">NM_152678</a> | <a href="#">All miRNA predictions</a> | 3.71 | <a href="#">hsa-miR-125a</a> | <a href="#">Genome browser</a> | Homo sapiens hypothetical protein FLJ34969 (FLJ34969), mRNA.                                                                                   |
| <a href="#">175</a> | <a href="#">NM_033143</a> | <a href="#">All miRNA predictions</a> | 3.71 | <a href="#">hsa-miR-125a</a> | <a href="#">Genome browser</a> | Homo sapiens fibroblast growth factor 5 (FGF5), transcript variant 2, mRNA.                                                                    |
| <a href="#">176</a> | <a href="#">NM_130476</a> | <a href="#">All miRNA predictions</a> | 3.70 | <a href="#">hsa-miR-125a</a> | <a href="#">Genome browser</a> | Homo sapiens MAP-kinase activating death domain (MADD), transcript variant 8, mRNA.                                                            |
| <a href="#">177</a> | <a href="#">NM_130470</a> | <a href="#">All miRNA predictions</a> | 3.69 | <a href="#">hsa-miR-125a</a> | <a href="#">Genome browser</a> | Homo sapiens MAP-kinase activating death domain (MADD), transcript variant 1, mRNA.                                                            |
| <a href="#">178</a> | <a href="#">NM_130471</a> | <a href="#">All miRNA predictions</a> | 3.69 | <a href="#">hsa-miR-125a</a> | <a href="#">Genome browser</a> | Homo sapiens MAP-kinase activating death domain (MADD), transcript variant 2, mRNA.                                                            |
| <a href="#">179</a> | <a href="#">NM_130472</a> | <a href="#">All miRNA predictions</a> | 3.69 | <a href="#">hsa-miR-125a</a> | <a href="#">Genome browser</a> | Homo sapiens MAP-kinase activating death domain (MADD), transcript variant 3, mRNA.                                                            |
| <a href="#">180</a> | <a href="#">NM_130473</a> | <a href="#">All miRNA predictions</a> | 3.69 | <a href="#">hsa-miR-125a</a> | <a href="#">Genome browser</a> | Homo sapiens MAP-kinase activating death domain (MADD), transcript variant 5, mRNA.                                                            |
| <a href="#">181</a> | <a href="#">NM_003682</a> | <a href="#">All miRNA predictions</a> | 3.69 | <a href="#">hsa-miR-125a</a> | <a href="#">Genome browser</a> | Homo sapiens MAP-kinase activating death domain (MADD), transcript variant 4, mRNA.                                                            |
| <a href="#">182</a> | <a href="#">NM_014603</a> | <a href="#">All miRNA predictions</a> | 3.68 | <a href="#">hsa-miR-125a</a> | <a href="#">Genome browser</a> | Homo sapiens paraneoplastic antigen (HUMPPA), mRNA.                                                                                            |
| <a href="#">183</a> | <a href="#">NM_002657</a> | <a href="#">All miRNA predictions</a> | 3.67 | <a href="#">hsa-miR-125a</a> | <a href="#">Genome browser</a> | Homo sapiens pleiomorphic adenoma gene-like 2 (PLAGL2), mRNA.                                                                                  |
| <a href="#">184</a> | <a href="#">NM_012482</a> | <a href="#">All miRNA predictions</a> | 3.67 | <a href="#">hsa-miR-125a</a> | <a href="#">Genome browser</a> | Homo sapiens zinc finger protein 281 (ZNF281), mRNA.                                                                                           |
| <a href="#">185</a> | <a href="#">NM_015076</a> | <a href="#">All miRNA predictions</a> | 3.65 | <a href="#">hsa-miR-125a</a> | <a href="#">Genome browser</a> | Homo sapiens cyclin-dependent kinase (CDC2-like) 11 (CDK11), mRNA.                                                                             |
| <a href="#">186</a> | <a href="#">NM_207346</a> | <a href="#">All miRNA predictions</a> | 3.65 | <a href="#">hsa-miR-125a</a> | <a href="#">Genome browser</a> | Homo sapiens likely homolog of yeast SEN54 (SEN54L), mRNA.                                                                                     |
| <a href="#">187</a> | <a href="#">NM_014735</a> | <a href="#">All miRNA predictions</a> | 3.65 | <a href="#">hsa-miR-125a</a> | <a href="#">Genome browser</a> | Homo sapiens PHD finger protein 16 (PHF16), mRNA.                                                                                              |
| <a href="#">188</a> | <a href="#">NM_181314</a> | <a href="#">All miRNA predictions</a> | 3.64 | <a href="#">hsa-miR-125a</a> | <a href="#">Genome browser</a> | Homo sapiens tafazzin (cardiomyopathy, dilated 3A (X-linked); endocardial fibroelastosis 2; Barth syndrome) (TAZ), transcript variant 5, mRNA. |
| <a href="#">189</a> | <a href="#">NM_015074</a> | <a href="#">All miRNA predictions</a> | 3.64 | <a href="#">hsa-miR-125a</a> | <a href="#">Genome browser</a> | Homo sapiens kinesin family member 1B (KIF1B), transcript variant 1, mRNA.                                                                     |
| <a href="#">190</a> | <a href="#">NM_002446</a> | <a href="#">All miRNA predictions</a> | 3.63 | <a href="#">hsa-miR-125a</a> | <a href="#">Genome browser</a> | Homo sapiens mitogen-activated protein kinase kinase kinase 10 (MAP3K10), mRNA.                                                                |
| <a href="#">191</a> | <a href="#">NM_001987</a> | <a href="#">All miRNA predictions</a> | 3.63 | <a href="#">hsa-miR-125a</a> | <a href="#">Genome browser</a> | Homo sapiens ets variant gene 6 (TEL oncogene) (ETV6), mRNA.                                                                                   |
| <a href="#">192</a> | <a href="#">NM_015518</a> | <a href="#">All miRNA predictions</a> | 3.61 | <a href="#">hsa-miR-125a</a> | <a href="#">Genome browser</a> | Homo sapiens DKFZP434C131 protein (DKFZP434C131), mRNA.                                                                                        |
| <a href="#">193</a> | <a href="#">NM_014552</a> | <a href="#">All miRNA predictions</a> | 3.60 | <a href="#">hsa-miR-125a</a> | <a href="#">Genome browser</a> | Homo sapiens transcription factor CP2-like 2 (TFCP2L2), transcript variant 1, mRNA.                                                            |
| <a href="#">194</a> | <a href="#">NM_017510</a> | <a href="#">All miRNA predictions</a> | 3.60 | <a href="#">hsa-miR-125a</a> | <a href="#">Genome browser</a> | Homo sapiens gp25L2 protein (HSGP25L2G), mRNA.                                                                                                 |
| <a href="#">195</a> | <a href="#">NM_172027</a> | <a href="#">All miRNA predictions</a> | 3.60 | <a href="#">hsa-miR-125a</a> | <a href="#">Genome browser</a> | Homo sapiens ankyrin repeat and BTB (POZ) domain containing 1 (ABTB1), transcript variant 2, mRNA.                                             |
| <a href="#">196</a> | <a href="#">NM_032548</a> | <a href="#">All miRNA predictions</a> | 3.60 | <a href="#">hsa-miR-125a</a> | <a href="#">Genome browser</a> | Homo sapiens ankyrin repeat and BTB (POZ) domain containing 1 (ABTB1), transcript variant 1, mRNA.                                             |
| <a href="#">197</a> | <a href="#">NM_014901</a> | <a href="#">All miRNA</a>             | 3.60 | <a href="#">hsa-miR-</a>     | <a href="#">Genome</a>         | Homo sapiens ring finger protein 44 (RNF44), mRNA.                                                                                             |

|                     |                           | <a href="#">predictions</a>           |      | <a href="#">125a</a>         | <a href="#">browser</a>        |                                                                                                                         |
|---------------------|---------------------------|---------------------------------------|------|------------------------------|--------------------------------|-------------------------------------------------------------------------------------------------------------------------|
| <a href="#">198</a> | <a href="#">NM_198182</a> | <a href="#">All miRNA predictions</a> | 3.60 | <a href="#">hsa-miR-125a</a> | <a href="#">Genome browser</a> | Homo sapiens transcription factor CP2-like 2 (TFCP2L2), transcript variant 2, mRNA.                                     |
| <a href="#">199</a> | <a href="#">NM_172028</a> | <a href="#">All miRNA predictions</a> | 3.60 | <a href="#">hsa-miR-125a</a> | <a href="#">Genome browser</a> | Homo sapiens ankyrin repeat and BTB (POZ) domain containing 1 (ABTB1), transcript variant 3, mRNA.                      |
| <a href="#">200</a> | <a href="#">NM_023016</a> | <a href="#">All miRNA predictions</a> | 3.59 | <a href="#">hsa-miR-125a</a> | <a href="#">Genome browser</a> | Homo sapiens chromosome 2 open reading frame 26 (C2orf26), mRNA.                                                        |
| <a href="#">201</a> | <a href="#">NM_020348</a> | <a href="#">All miRNA predictions</a> | 3.59 | <a href="#">hsa-miR-125a</a> | <a href="#">Genome browser</a> | Homo sapiens cyclin M1 (CNNM1), mRNA.                                                                                   |
| <a href="#">202</a> | <a href="#">NM_152663</a> | <a href="#">All miRNA predictions</a> | 3.56 | <a href="#">hsa-miR-125a</a> | <a href="#">Genome browser</a> | Homo sapiens Ral GEF with PH domain and SH3 binding motif 2 (RALGPS2), mRNA.                                            |
| <a href="#">203</a> | <a href="#">NM_130475</a> | <a href="#">All miRNA predictions</a> | 3.54 | <a href="#">hsa-miR-125a</a> | <a href="#">Genome browser</a> | Homo sapiens MAP-kinase activating death domain (MADD), transcript variant 7, mRNA.                                     |
| <a href="#">204</a> | <a href="#">NM_004118</a> | <a href="#">All miRNA predictions</a> | 3.54 | <a href="#">hsa-miR-125a</a> | <a href="#">Genome browser</a> | Homo sapiens forkhead-like 18 (Drosophila) (FKHL18), mRNA.                                                              |
| <a href="#">205</a> | <a href="#">NM_130474</a> | <a href="#">All miRNA predictions</a> | 3.54 | <a href="#">hsa-miR-125a</a> | <a href="#">Genome browser</a> | Homo sapiens MAP-kinase activating death domain (MADD), transcript variant 6, mRNA.                                     |
| <a href="#">206</a> | <a href="#">NM_052820</a> | <a href="#">All miRNA predictions</a> | 3.53 | <a href="#">hsa-miR-125a</a> | <a href="#">Genome browser</a> | Homo sapiens coronin, actin binding protein, 2A (CORO2A), transcript variant 2, mRNA.                                   |
| <a href="#">207</a> | <a href="#">NM_003389</a> | <a href="#">All miRNA predictions</a> | 3.53 | <a href="#">hsa-miR-125a</a> | <a href="#">Genome browser</a> | Homo sapiens coronin, actin binding protein, 2A (CORO2A), transcript variant 1, mRNA.                                   |
| <a href="#">208</a> | <a href="#">NM_183244</a> | <a href="#">All miRNA predictions</a> | 3.53 | <a href="#">hsa-miR-125a</a> | <a href="#">Genome browser</a> | Homo sapiens phosphatase and actin regulator 3 (PHACTR3), transcript variant 2, mRNA.                                   |
| <a href="#">209</a> | <a href="#">NM_183246</a> | <a href="#">All miRNA predictions</a> | 3.53 | <a href="#">hsa-miR-125a</a> | <a href="#">Genome browser</a> | Homo sapiens phosphatase and actin regulator 3 (PHACTR3), transcript variant 3, mRNA.                                   |
| <a href="#">210</a> | <a href="#">NM_021962</a> | <a href="#">All miRNA predictions</a> | 3.52 | <a href="#">hsa-miR-125a</a> | <a href="#">Genome browser</a> | Homo sapiens active BCR-related gene (ABR), transcript variant 1, mRNA.                                                 |
| <a href="#">211</a> | <a href="#">NM_080672</a> | <a href="#">All miRNA predictions</a> | 3.52 | <a href="#">hsa-miR-125a</a> | <a href="#">Genome browser</a> | Homo sapiens phosphatase and actin regulator 3 (PHACTR3), transcript variant 1, mRNA.                                   |
| <a href="#">212</a> | <a href="#">NM_001092</a> | <a href="#">All miRNA predictions</a> | 3.52 | <a href="#">hsa-miR-125a</a> | <a href="#">Genome browser</a> | Homo sapiens active BCR-related gene (ABR), transcript variant 2, mRNA.                                                 |
| <a href="#">213</a> | <a href="#">NM_014905</a> | <a href="#">All miRNA predictions</a> | 3.50 | <a href="#">hsa-miR-125a</a> | <a href="#">Genome browser</a> | Homo sapiens glutaminase (GLS), mRNA.                                                                                   |
| <a href="#">214</a> | <a href="#">NM_017495</a> | <a href="#">All miRNA predictions</a> | 3.50 | <a href="#">hsa-miR-125a</a> | <a href="#">Genome browser</a> | Homo sapiens RNA-binding region (RNP1, RRM) containing 1 (RNPC1), transcript variant 1, mRNA.                           |
| <a href="#">215</a> | <a href="#">NM_022833</a> | <a href="#">All miRNA predictions</a> | 3.49 | <a href="#">hsa-miR-125a</a> | <a href="#">Genome browser</a> | Homo sapiens chromosome 9 open reading frame 88 (C9orf88), mRNA.                                                        |
| <a href="#">216</a> | <a href="#">NM_003690</a> | <a href="#">All miRNA predictions</a> | 3.49 | <a href="#">hsa-miR-125a</a> | <a href="#">Genome browser</a> | Homo sapiens protein kinase, interferon-inducible double stranded RNA dependent activator (PRKRA), mRNA.                |
| <a href="#">217</a> | <a href="#">NM_001204</a> | <a href="#">All miRNA predictions</a> | 3.49 | <a href="#">hsa-miR-125a</a> | <a href="#">Genome browser</a> | Homo sapiens bone morphogenetic protein receptor, type II (serine/threonine kinase) (BMP2), transcript variant 1, mRNA. |
| <a href="#">218</a> | <a href="#">NM_017911</a> | <a href="#">All miRNA predictions</a> | 3.48 | <a href="#">hsa-miR-125a</a> | <a href="#">Genome browser</a> | Homo sapiens chromosome 22 open reading frame 8 (C22orf8), mRNA.                                                        |
| <a href="#">219</a> | <a href="#">NM_003759</a> | <a href="#">All miRNA predictions</a> | 3.48 | <a href="#">hsa-miR-125a</a> | <a href="#">Genome browser</a> | Homo sapiens solute carrier family 4, sodium bicarbonate cotransporter, member 4 (SLC4A4), mRNA.                        |
| <a href="#">220</a> | <a href="#">NM_033540</a> | <a href="#">All miRNA predictions</a> | 3.47 | <a href="#">hsa-miR-125a</a> | <a href="#">Genome browser</a> | Homo sapiens mitofusin 1 (MFN1), nuclear gene encoding mitochondrial protein, transcript variant 1, mRNA.               |
| <a href="#">221</a> | <a href="#">NM_013272</a> | <a href="#">All miRNA predictions</a> | 3.46 | <a href="#">hsa-miR-125a</a> | <a href="#">Genome browser</a> | Homo sapiens solute carrier organic anion transporter family, member 3A1 (SLCO3A1), mRNA.                               |
| <a href="#">222</a> | <a href="#">NM_080491</a> | <a href="#">All miRNA predictions</a> | 3.46 | <a href="#">hsa-miR-125a</a> | <a href="#">Genome browser</a> | Homo sapiens GRB2-associated binding protein 2 (GAB2), transcript variant 1, mRNA.                                      |
| <a href="#">223</a> | <a href="#">NM_002207</a> | <a href="#">All miRNA predictions</a> | 3.46 | <a href="#">hsa-miR-125a</a> | <a href="#">Genome browser</a> | Homo sapiens integrin, alpha 9 (ITGA9), mRNA.                                                                           |
| <a href="#">224</a> | <a href="#">NM_003957</a> | <a href="#">All miRNA predictions</a> | 3.46 | <a href="#">hsa-miR-125a</a> | <a href="#">Genome browser</a> | Homo sapiens serine/threonine kinase 29 (STK29), mRNA.                                                                  |
| <a href="#">225</a> | <a href="#">NM_012296</a> | <a href="#">All miRNA predictions</a> | 3.46 | <a href="#">hsa-miR-125a</a> | <a href="#">Genome browser</a> | Homo sapiens GRB2-associated binding protein 2 (GAB2), transcript variant 2, mRNA.                                      |
| <a href="#">226</a> | <a href="#">NM_032557</a> | <a href="#">All miRNA predictions</a> | 3.44 | <a href="#">hsa-miR-125a</a> | <a href="#">Genome browser</a> | Homo sapiens ubiquitin specific protease 38 (USP38), mRNA.                                                              |
| <a href="#">227</a> | <a href="#">NM_203403</a> | <a href="#">All miRNA predictions</a> | 3.44 | <a href="#">hsa-miR-125a</a> | <a href="#">Genome browser</a> | Homo sapiens chromosome 9 open reading frame 150 (C9orf150), mRNA.                                                      |



|                     |                           |                                       |      |                              |                                |                                                                                                                                    |
|---------------------|---------------------------|---------------------------------------|------|------------------------------|--------------------------------|------------------------------------------------------------------------------------------------------------------------------------|
| <a href="#">228</a> | <a href="#">NM_178454</a> | <a href="#">All miRNA predictions</a> | 3.44 | <a href="#">hsa-miR-125a</a> | <a href="#">Genome browser</a> | Homo sapiens hypothetical protein MGC54289 (MGC54289), mRNA.                                                                       |
| <a href="#">229</a> | <a href="#">NM_003330</a> | <a href="#">All miRNA predictions</a> | 3.43 | <a href="#">hsa-miR-125a</a> | <a href="#">Genome browser</a> | Homo sapiens thioredoxin reductase 1 (TXNRD1), transcript variant 1, mRNA.                                                         |
| <a href="#">230</a> | <a href="#">NM_182743</a> | <a href="#">All miRNA predictions</a> | 3.43 | <a href="#">hsa-miR-125a</a> | <a href="#">Genome browser</a> | Homo sapiens thioredoxin reductase 1 (TXNRD1), transcript variant 4, mRNA.                                                         |
| <a href="#">231</a> | <a href="#">NM_182729</a> | <a href="#">All miRNA predictions</a> | 3.43 | <a href="#">hsa-miR-125a</a> | <a href="#">Genome browser</a> | Homo sapiens thioredoxin reductase 1 (TXNRD1), transcript variant 5, mRNA.                                                         |
| <a href="#">232</a> | <a href="#">NM_182742</a> | <a href="#">All miRNA predictions</a> | 3.43 | <a href="#">hsa-miR-125a</a> | <a href="#">Genome browser</a> | Homo sapiens thioredoxin reductase 1 (TXNRD1), transcript variant 2, mRNA.                                                         |
| <a href="#">233</a> | <a href="#">NM_018323</a> | <a href="#">All miRNA predictions</a> | 3.38 | <a href="#">hsa-miR-125a</a> | <a href="#">Genome browser</a> | Homo sapiens phosphatidylinositol 4-kinase type-II beta (PI4K2B), mRNA.                                                            |
| <a href="#">234</a> | <a href="#">NM_016339</a> | <a href="#">All miRNA predictions</a> | 3.37 | <a href="#">hsa-miR-125a</a> | <a href="#">Genome browser</a> | Homo sapiens Rap guanine nucleotide exchange factor (GEF)-like 1 (RAPGEFL1), mRNA.                                                 |
| <a href="#">235</a> | <a href="#">NM_020935</a> | <a href="#">All miRNA predictions</a> | 3.37 | <a href="#">hsa-miR-125a</a> | <a href="#">Genome browser</a> | Homo sapiens ubiquitin specific protease 37 (USP37), mRNA.                                                                         |
| <a href="#">236</a> | <a href="#">NM_183425</a> | <a href="#">All miRNA predictions</a> | 3.36 | <a href="#">hsa-miR-125a</a> | <a href="#">Genome browser</a> | Homo sapiens RNA-binding region (RNP1, RRM) containing 1 (RNPC1), transcript variant 2, mRNA.                                      |
| <a href="#">237</a> | <a href="#">NM_033346</a> | <a href="#">All miRNA predictions</a> | 3.34 | <a href="#">hsa-miR-125a</a> | <a href="#">Genome browser</a> | Homo sapiens bone morphogenetic protein receptor, type II (serine/threonine kinase) (BMPR2), transcript variant 2, mRNA.           |
| <a href="#">238</a> | <a href="#">NM_182966</a> | <a href="#">All miRNA predictions</a> | 3.32 | <a href="#">hsa-miR-125a</a> | <a href="#">Genome browser</a> | Homo sapiens neural precursor cell expressed, developmentally down-regulated 9 (NEDD9), mRNA.                                      |
| <a href="#">239</a> | <a href="#">NM_004540</a> | <a href="#">All miRNA predictions</a> | 3.32 | <a href="#">hsa-miR-125a</a> | <a href="#">Genome browser</a> | Homo sapiens neural cell adhesion molecule 2 (NCAM2), mRNA.                                                                        |
| <a href="#">240</a> | <a href="#">NM_032046</a> | <a href="#">All miRNA predictions</a> | 3.32 | <a href="#">hsa-miR-125a</a> | <a href="#">Genome browser</a> | Homo sapiens mosaic serine protease (MSP), mRNA.                                                                                   |
| <a href="#">241</a> | <a href="#">NM_002092</a> | <a href="#">All miRNA predictions</a> | 3.32 | <a href="#">hsa-miR-125a</a> | <a href="#">Genome browser</a> | Homo sapiens G-rich RNA sequence binding factor 1 (GRSF1), mRNA.                                                                   |
| <a href="#">242</a> | <a href="#">NM_015517</a> | <a href="#">All miRNA predictions</a> | 3.31 | <a href="#">hsa-miR-125a</a> | <a href="#">Genome browser</a> | Homo sapiens MBD2 (methyl-CpG-binding protein)-interacting zinc finger protein (MIZF), transcript variant 1, mRNA.                 |
| <a href="#">243</a> | <a href="#">NM_002419</a> | <a href="#">All miRNA predictions</a> | 3.31 | <a href="#">hsa-miR-125a</a> | <a href="#">Genome browser</a> | Homo sapiens mitogen-activated protein kinase kinase kinase 11 (MAP3K11), mRNA.                                                    |
| <a href="#">244</a> | <a href="#">NM_198971</a> | <a href="#">All miRNA predictions</a> | 3.31 | <a href="#">hsa-miR-125a</a> | <a href="#">Genome browser</a> | Homo sapiens MBD2 (methyl-CpG-binding protein)-interacting zinc finger protein (MIZF), transcript variant 2, mRNA.                 |
| <a href="#">245</a> | <a href="#">NM_001955</a> | <a href="#">All miRNA predictions</a> | 3.30 | <a href="#">hsa-miR-125a</a> | <a href="#">Genome browser</a> | Homo sapiens endothelin 1 (EDN1), mRNA.                                                                                            |
| <a href="#">246</a> | <a href="#">NM_003816</a> | <a href="#">All miRNA predictions</a> | 3.30 | <a href="#">hsa-miR-125a</a> | <a href="#">Genome browser</a> | Homo sapiens a disintegrin and metalloproteinase domain 9 (meltrin gamma) (ADAM9), transcript variant 1, mRNA.                     |
| <a href="#">247</a> | <a href="#">NM_024718</a> | <a href="#">All miRNA predictions</a> | 3.29 | <a href="#">hsa-miR-125a</a> | <a href="#">Genome browser</a> | Homo sapiens chromosome 9 open reading frame 86 (C9orf86), mRNA.                                                                   |
| <a href="#">248</a> | <a href="#">NM_007372</a> | <a href="#">All miRNA predictions</a> | 3.29 | <a href="#">hsa-miR-125a</a> | <a href="#">Genome browser</a> | Homo sapiens DEAD (Asp-Glu-Ala-Asp) box polypeptide 42 (DDX42), transcript variant 1, mRNA.                                        |
| <a href="#">249</a> | <a href="#">NM_203499</a> | <a href="#">All miRNA predictions</a> | 3.29 | <a href="#">hsa-miR-125a</a> | <a href="#">Genome browser</a> | Homo sapiens DEAD (Asp-Glu-Ala-Asp) box polypeptide 42 (DDX42), transcript variant 2, mRNA.                                        |
| <a href="#">250</a> | <a href="#">NM_005342</a> | <a href="#">All miRNA predictions</a> | 3.28 | <a href="#">hsa-miR-125a</a> | <a href="#">Genome browser</a> | Homo sapiens high-mobility group box 3 (HMGB3), mRNA.                                                                              |
| <a href="#">251</a> | <a href="#">NM_182488</a> | <a href="#">All miRNA predictions</a> | 3.28 | <a href="#">hsa-miR-125a</a> | <a href="#">Genome browser</a> | Homo sapiens ubiquitin specific protease 12 (USP12), mRNA.                                                                         |
| <a href="#">252</a> | <a href="#">NM_000434</a> | <a href="#">All miRNA predictions</a> | 3.27 | <a href="#">hsa-miR-125a</a> | <a href="#">Genome browser</a> | Homo sapiens sialidase 1 (lysosomal sialidase) (NEU1), mRNA.                                                                       |
| <a href="#">253</a> | <a href="#">NM_024090</a> | <a href="#">All miRNA predictions</a> | 3.27 | <a href="#">hsa-miR-125a</a> | <a href="#">Genome browser</a> | Homo sapiens ELOVL family member 6, elongation of long chain fatty acids (FEN1/Elo2, SUR4/Elo3-like, yeast) (ELOVL6), mRNA.        |
| <a href="#">254</a> | <a href="#">NM_139276</a> | <a href="#">All miRNA predictions</a> | 3.25 | <a href="#">hsa-miR-125a</a> | <a href="#">Genome browser</a> | Homo sapiens signal transducer and activator of transcription 3 (acute-phase response factor) (STAT3), transcript variant 1, mRNA. |
| <a href="#">255</a> | <a href="#">NM_017813</a> | <a href="#">All miRNA predictions</a> | 3.25 | <a href="#">hsa-miR-125a</a> | <a href="#">Genome browser</a> | Homo sapiens hypothetical protein FLJ20421 (FLJ20421), mRNA.                                                                       |
| <a href="#">256</a> | <a href="#">NM_018108</a> | <a href="#">All miRNA predictions</a> | 3.25 | <a href="#">hsa-miR-125a</a> | <a href="#">Genome browser</a> | Homo sapiens chromosome 14 open reading frame 130 (C14orf130), mRNA.                                                               |
| <a href="#">257</a> | <a href="#">NM_003150</a> | <a href="#">All miRNA predictions</a> | 3.25 | <a href="#">hsa-miR-125a</a> | <a href="#">Genome browser</a> | Homo sapiens signal transducer and activator of transcription 3 (acute-phase response factor) (STAT3),                             |

|                     |                           |                                       |      |                              |                                | transcript variant 2, mRNA.                                                                                                                               |
|---------------------|---------------------------|---------------------------------------|------|------------------------------|--------------------------------|-----------------------------------------------------------------------------------------------------------------------------------------------------------|
| <a href="#">258</a> | <a href="#">NM_022039</a> | <a href="#">All miRNA predictions</a> | 3.24 | <a href="#">hsa-miR-125a</a> | <a href="#">Genome browser</a> | Homo sapiens split hand/foot malformation (ectrodactyly) type 3 (SHFM3), mRNA.                                                                            |
| <a href="#">259</a> | <a href="#">NM_016219</a> | <a href="#">All miRNA predictions</a> | 3.22 | <a href="#">hsa-miR-125a</a> | <a href="#">Genome browser</a> | Homo sapiens mannosidase, alpha, class 1B, member 1 (MAN1B1), mRNA.                                                                                       |
| <a href="#">260</a> | <a href="#">NM_007230</a> | <a href="#">All miRNA predictions</a> | 3.22 | <a href="#">hsa-miR-125a</a> | <a href="#">Genome browser</a> | n/a                                                                                                                                                       |
| <a href="#">261</a> | <a href="#">NM_012154</a> | <a href="#">All miRNA predictions</a> | 3.21 | <a href="#">hsa-miR-125a</a> | <a href="#">Genome browser</a> | Homo sapiens eukaryotic translation initiation factor 2C, 2 (EIF2C2), mRNA.                                                                               |
| <a href="#">262</a> | <a href="#">NM_020630</a> | <a href="#">All miRNA predictions</a> | 3.21 | <a href="#">hsa-miR-125a</a> | <a href="#">Genome browser</a> | Homo sapiens ret proto-oncogene (multiple endocrine neoplasia and medullary thyroid carcinoma 1, Hirschsprung disease) (RET), transcript variant 4, mRNA. |
| <a href="#">263</a> | <a href="#">NM_030576</a> | <a href="#">All miRNA predictions</a> | 3.20 | <a href="#">hsa-miR-125a</a> | <a href="#">Genome browser</a> | Homo sapiens hypothetical protein MGC10986 (MGC10986), mRNA.                                                                                              |
| <a href="#">264</a> | <a href="#">NM_005889</a> | <a href="#">All miRNA predictions</a> | 3.20 | <a href="#">hsa-miR-125a</a> | <a href="#">Genome browser</a> | Homo sapiens apolipoprotein B mRNA editing enzyme, catalytic polypeptide 1 (APOBEC1), transcript variant 2, mRNA.                                         |
| <a href="#">265</a> | <a href="#">NM_021991</a> | <a href="#">All miRNA predictions</a> | 3.19 | <a href="#">hsa-miR-125a</a> | <a href="#">Genome browser</a> | Homo sapiens junction plakoglobin (JUP), transcript variant 2, mRNA.                                                                                      |
| <a href="#">266</a> | <a href="#">NM_017740</a> | <a href="#">All miRNA predictions</a> | 3.19 | <a href="#">hsa-miR-125a</a> | <a href="#">Genome browser</a> | Homo sapiens zinc finger, DHHC domain containing 7 (ZDHHC7), mRNA.                                                                                        |
| <a href="#">267</a> | <a href="#">NM_002656</a> | <a href="#">All miRNA predictions</a> | 3.17 | <a href="#">hsa-miR-125a</a> | <a href="#">Genome browser</a> | Homo sapiens pleiomorphic adenoma gene-like 1 (PLAGL1), transcript variant 1, mRNA.                                                                       |
| <a href="#">268</a> | <a href="#">NM_006718</a> | <a href="#">All miRNA predictions</a> | 3.17 | <a href="#">hsa-miR-125a</a> | <a href="#">Genome browser</a> | Homo sapiens pleiomorphic adenoma gene-like 1 (PLAGL1), transcript variant 2, mRNA.                                                                       |
| <a href="#">269</a> | <a href="#">NM_020921</a> | <a href="#">All miRNA predictions</a> | 3.16 | <a href="#">hsa-miR-125a</a> | <a href="#">Genome browser</a> | Homo sapiens ninein (GSK3B interacting protein) (NIN), transcript variant 2, mRNA.                                                                        |
| <a href="#">270</a> | <a href="#">NM_183011</a> | <a href="#">All miRNA predictions</a> | 3.16 | <a href="#">hsa-miR-125a</a> | <a href="#">Genome browser</a> | Homo sapiens cAMP responsive element modulator (CREM), transcript variant 21, mRNA.                                                                       |
| <a href="#">271</a> | <a href="#">NM_145313</a> | <a href="#">All miRNA predictions</a> | 3.16 | <a href="#">hsa-miR-125a</a> | <a href="#">Genome browser</a> | Homo sapiens RasGEF domain family, member 1A (RASGEF1A), mRNA.                                                                                            |
| <a href="#">272</a> | <a href="#">NM_182717</a> | <a href="#">All miRNA predictions</a> | 3.16 | <a href="#">hsa-miR-125a</a> | <a href="#">Genome browser</a> | Homo sapiens cAMP responsive element modulator (CREM), transcript variant 4, mRNA.                                                                        |
| <a href="#">273</a> | <a href="#">NM_032364</a> | <a href="#">All miRNA predictions</a> | 3.16 | <a href="#">hsa-miR-125a</a> | <a href="#">Genome browser</a> | Homo sapiens DnaJ (Hsp40) homolog, subfamily C, member 14 (DNAJC14), mRNA.                                                                                |
| <a href="#">274</a> | <a href="#">NM_182721</a> | <a href="#">All miRNA predictions</a> | 3.16 | <a href="#">hsa-miR-125a</a> | <a href="#">Genome browser</a> | Homo sapiens cAMP responsive element modulator (CREM), transcript variant 8, mRNA.                                                                        |
| <a href="#">275</a> | <a href="#">NM_183013</a> | <a href="#">All miRNA predictions</a> | 3.16 | <a href="#">hsa-miR-125a</a> | <a href="#">Genome browser</a> | Homo sapiens cAMP responsive element modulator (CREM), transcript variant 19, mRNA.                                                                       |
| <a href="#">276</a> | <a href="#">NM_182853</a> | <a href="#">All miRNA predictions</a> | 3.16 | <a href="#">hsa-miR-125a</a> | <a href="#">Genome browser</a> | Homo sapiens cAMP responsive element modulator (CREM), transcript variant 18, mRNA.                                                                       |
| <a href="#">277</a> | <a href="#">NM_017811</a> | <a href="#">All miRNA predictions</a> | 3.16 | <a href="#">hsa-miR-125a</a> | <a href="#">Genome browser</a> | Homo sapiens ubiquitin-conjugating enzyme E2R 2 (UBE2R2), mRNA.                                                                                           |
| <a href="#">278</a> | <a href="#">NM_182720</a> | <a href="#">All miRNA predictions</a> | 3.16 | <a href="#">hsa-miR-125a</a> | <a href="#">Genome browser</a> | Homo sapiens cAMP responsive element modulator (CREM), transcript variant 7, mRNA.                                                                        |
| <a href="#">279</a> | <a href="#">NM_017423</a> | <a href="#">All miRNA predictions</a> | 3.16 | <a href="#">hsa-miR-125a</a> | <a href="#">Genome browser</a> | Homo sapiens UDP-N-acetyl-alpha-D-galactosamine:polypeptide N-acetylgalactosaminyltransferase 7 (GalNac-T7) (GALNT7), mRNA.                               |
| <a href="#">280</a> | <a href="#">NM_182723</a> | <a href="#">All miRNA predictions</a> | 3.16 | <a href="#">hsa-miR-125a</a> | <a href="#">Genome browser</a> | Homo sapiens cAMP responsive element modulator (CREM), transcript variant 10, mRNA.                                                                       |
| <a href="#">281</a> | <a href="#">NM_182722</a> | <a href="#">All miRNA predictions</a> | 3.16 | <a href="#">hsa-miR-125a</a> | <a href="#">Genome browser</a> | Homo sapiens cAMP responsive element modulator (CREM), transcript variant 9, mRNA.                                                                        |
| <a href="#">282</a> | <a href="#">NM_183012</a> | <a href="#">All miRNA predictions</a> | 3.16 | <a href="#">hsa-miR-125a</a> | <a href="#">Genome browser</a> | Homo sapiens cAMP responsive element modulator (CREM), transcript variant 20, mRNA.                                                                       |
| <a href="#">283</a> | <a href="#">NM_213662</a> | <a href="#">All miRNA predictions</a> | 3.15 | <a href="#">hsa-miR-125a</a> | <a href="#">Genome browser</a> | Homo sapiens signal transducer and activator of transcription 3 (acute-phase response factor) (STAT3), transcript variant 3, mRNA.                        |
| <a href="#">284</a> | <a href="#">NM_002715</a> | <a href="#">All miRNA predictions</a> | 3.14 | <a href="#">hsa-miR-125a</a> | <a href="#">Genome browser</a> | Homo sapiens protein phosphatase 2 (formerly 2A), catalytic subunit, alpha isoform (PPP2CA), mRNA.                                                        |
| <a href="#">285</a> | <a href="#">NM_024572</a> | <a href="#">All miRNA predictions</a> | 3.14 | <a href="#">hsa-miR-125a</a> | <a href="#">Genome browser</a> | Homo sapiens UDP-N-acetyl-alpha-D-galactosamine:polypeptide N-acetylgalactosaminyltransferase 14 (GalNac-T14) (GALNT14), mRNA.                            |
| <a href="#">286</a> | <a href="#">NM_139275</a> | <a href="#">All miRNA</a>             | 3.12 | <a href="#">hsa-miR-</a>     | <a href="#">Genome</a>         | Homo sapiens A kinase (PRKA) anchor protein 1                                                                                                             |

|                     |                              | <a href="#">predictions</a>           |      | <a href="#">125a</a>         | <a href="#">browser</a>        |                                                                                                                                       |
|---------------------|------------------------------|---------------------------------------|------|------------------------------|--------------------------------|---------------------------------------------------------------------------------------------------------------------------------------|
|                     |                              |                                       |      |                              |                                | (AKAP1), nuclear gene encoding mitochondrial protein, transcript variant 2, mRNA.                                                     |
| <a href="#">287</a> | <a href="#">NM_001315</a>    | <a href="#">All miRNA predictions</a> | 3.11 | <a href="#">hsa-miR-125a</a> | <a href="#">Genome browser</a> | Homo sapiens mitogen-activated protein kinase 14 (MAPK14), transcript variant 1, mRNA.                                                |
| <a href="#">288</a> | <a href="#">NM_139012</a>    | <a href="#">All miRNA predictions</a> | 3.11 | <a href="#">hsa-miR-125a</a> | <a href="#">Genome browser</a> | Homo sapiens mitogen-activated protein kinase 14 (MAPK14), transcript variant 2, mRNA.                                                |
| <a href="#">289</a> | <a href="#">NM_015481</a>    | <a href="#">All miRNA predictions</a> | 3.10 | <a href="#">hsa-miR-125a</a> | <a href="#">Genome browser</a> | Homo sapiens zinc finger protein 385 (ZNF385), mRNA.                                                                                  |
| <a href="#">290</a> | <a href="#">NM_004756</a>    | <a href="#">All miRNA predictions</a> | 3.10 | <a href="#">hsa-miR-125a</a> | <a href="#">Genome browser</a> | Homo sapiens numb homolog (Drosophila)-like (NUMBL), mRNA.                                                                            |
| <a href="#">291</a> | <a href="#">NM_001001702</a> | <a href="#">All miRNA predictions</a> | 3.09 | <a href="#">hsa-miR-125a</a> | <a href="#">Genome browser</a> | Homo sapiens FLJ33360 protein (FLJ33360), mRNA.                                                                                       |
| <a href="#">292</a> | <a href="#">NM_001003891</a> | <a href="#">All miRNA predictions</a> | 3.09 | <a href="#">hsa-miR-125a</a> | <a href="#">Genome browser</a> | Homo sapiens PC2 (positive cofactor 2, multiprotein complex) glutamine/Q-rich-associated protein (PCQAP), transcript variant 1, mRNA. |
| <a href="#">293</a> | <a href="#">NM_003598</a>    | <a href="#">All miRNA predictions</a> | 3.09 | <a href="#">hsa-miR-125a</a> | <a href="#">Genome browser</a> | Homo sapiens TEA domain family member 2 (TEAD2), mRNA.                                                                                |
| <a href="#">294</a> | <a href="#">NM_015889</a>    | <a href="#">All miRNA predictions</a> | 3.09 | <a href="#">hsa-miR-125a</a> | <a href="#">Genome browser</a> | Homo sapiens PC2 (positive cofactor 2, multiprotein complex) glutamine/Q-rich-associated protein (PCQAP), transcript variant 2, mRNA. |
| <a href="#">295</a> | <a href="#">NM_152860</a>    | <a href="#">All miRNA predictions</a> | 3.08 | <a href="#">hsa-miR-125a</a> | <a href="#">Genome browser</a> | Homo sapiens Sp7 transcription factor (SP7), mRNA.                                                                                    |
| <a href="#">296</a> | <a href="#">NM_002646</a>    | <a href="#">All miRNA predictions</a> | 3.08 | <a href="#">hsa-miR-125a</a> | <a href="#">Genome browser</a> | Homo sapiens phosphoinositide-3-kinase, class 2, beta polypeptide (PIK3C2B), mRNA.                                                    |
| <a href="#">297</a> | <a href="#">NM_032229</a>    | <a href="#">All miRNA predictions</a> | 3.07 | <a href="#">hsa-miR-125a</a> | <a href="#">Genome browser</a> | Homo sapiens SLIT and NTRK-like family, member 6 (SLITRK6), mRNA.                                                                     |
| <a href="#">298</a> | <a href="#">NM_005433</a>    | <a href="#">All miRNA predictions</a> | 3.06 | <a href="#">hsa-miR-125a</a> | <a href="#">Genome browser</a> | Homo sapiens v-yes-1 Yamaguchi sarcoma viral oncogene homolog 1 (YES1), mRNA.                                                         |
| <a href="#">299</a> | <a href="#">NM_181701</a>    | <a href="#">All miRNA predictions</a> | 3.06 | <a href="#">hsa-miR-125a</a> | <a href="#">Genome browser</a> | Homo sapiens quiescin Q6-like 1 (QSCN6L1), mRNA.                                                                                      |
| <a href="#">300</a> | <a href="#">NM_024293</a>    | <a href="#">All miRNA predictions</a> | 3.06 | <a href="#">hsa-miR-125a</a> | <a href="#">Genome browser</a> | Homo sapiens chromosome 2 open reading frame 17 (C2orf17), mRNA.                                                                      |
| <a href="#">301</a> | <a href="#">NM_033260</a>    | <a href="#">All miRNA predictions</a> | 3.06 | <a href="#">hsa-miR-125a</a> | <a href="#">Genome browser</a> | Homo sapiens forkhead box Q1 (FOXQ1), mRNA.                                                                                           |
| <a href="#">302</a> | <a href="#">NM_033315</a>    | <a href="#">All miRNA predictions</a> | 3.06 | <a href="#">hsa-miR-125a</a> | <a href="#">Genome browser</a> | Homo sapiens RAS-like, family 10, member B (RASL10B), mRNA.                                                                           |
| <a href="#">303</a> | <a href="#">NM_006734</a>    | <a href="#">All miRNA predictions</a> | 3.05 | <a href="#">hsa-miR-125a</a> | <a href="#">Genome browser</a> | Homo sapiens human immunodeficiency virus type I enhancer binding protein 2 (HIVEP2), mRNA.                                           |
| <a href="#">304</a> | <a href="#">NM_006426</a>    | <a href="#">All miRNA predictions</a> | 3.05 | <a href="#">hsa-miR-125a</a> | <a href="#">Genome browser</a> | Homo sapiens dihydropyrimidinase-like 4 (DPYSL4), mRNA.                                                                               |
| <a href="#">305</a> | <a href="#">NM_139014</a>    | <a href="#">All miRNA predictions</a> | 3.05 | <a href="#">hsa-miR-125a</a> | <a href="#">Genome browser</a> | Homo sapiens mitogen-activated protein kinase 14 (MAPK14), transcript variant 4, mRNA.                                                |
| <a href="#">306</a> | <a href="#">NM_003488</a>    | <a href="#">All miRNA predictions</a> | 3.05 | <a href="#">hsa-miR-125a</a> | <a href="#">Genome browser</a> | Homo sapiens A kinase (PRKA) anchor protein 1 (AKAP1), nuclear gene encoding mitochondrial protein, transcript variant 1, mRNA.       |
| <a href="#">307</a> | <a href="#">NM_003728</a>    | <a href="#">All miRNA predictions</a> | 3.04 | <a href="#">hsa-miR-125a</a> | <a href="#">Genome browser</a> | Homo sapiens unc-5 homolog C (C. elegans) (UNC5C), mRNA.                                                                              |
| <a href="#">308</a> | <a href="#">NM_012338</a>    | <a href="#">All miRNA predictions</a> | 3.04 | <a href="#">hsa-miR-125a</a> | <a href="#">Genome browser</a> | Homo sapiens transmembrane 4 superfamily member 12 (TM4SF12), mRNA.                                                                   |
| <a href="#">309</a> | <a href="#">NM_133625</a>    | <a href="#">All miRNA predictions</a> | 3.03 | <a href="#">hsa-miR-125a</a> | <a href="#">Genome browser</a> | Homo sapiens synapsin II (SYN2), transcript variant IIa, mRNA.                                                                        |
| <a href="#">310</a> | <a href="#">NM_080670</a>    | <a href="#">All miRNA predictions</a> | 3.02 | <a href="#">hsa-miR-125a</a> | <a href="#">Genome browser</a> | Homo sapiens solute carrier family 35, member A4 (SLC35A4), mRNA.                                                                     |
| <a href="#">311</a> | <a href="#">NM_004475</a>    | <a href="#">All miRNA predictions</a> | 3.01 | <a href="#">hsa-miR-125a</a> | <a href="#">Genome browser</a> | Homo sapiens flotillin 2 (FLOT2), mRNA.                                                                                               |
| <a href="#">312</a> | <a href="#">NM_001002924</a> | <a href="#">All miRNA predictions</a> | 3.01 | <a href="#">hsa-miR-125a</a> | <a href="#">Genome browser</a> | Homo sapiens adaptor-related protein complex 3, sigma 1 subunit (AP3S1), transcript variant 2, mRNA.                                  |
| <a href="#">313</a> | <a href="#">NM_032632</a>    | <a href="#">All miRNA predictions</a> | 3.00 | <a href="#">hsa-miR-125a</a> | <a href="#">Genome browser</a> | Homo sapiens poly(A) polymerase alpha (PAPOLA), mRNA.                                                                                 |
| <a href="#">314</a> | <a href="#">NM_001005476</a> | <a href="#">All miRNA predictions</a> | 3.00 | <a href="#">hsa-miR-125a</a> | <a href="#">Genome browser</a> | Homo sapiens plakophilin 4 (PKP4), transcript variant 2, mRNA.                                                                        |
| <a href="#">315</a> | <a href="#">NM_003628</a>    | <a href="#">All miRNA predictions</a> | 3.00 | <a href="#">hsa-miR-125a</a> | <a href="#">Genome browser</a> | Homo sapiens plakophilin 4 (PKP4), transcript variant 1, mRNA.                                                                        |
| <a href="#">316</a> | <a href="#">NM_177560</a>    | <a href="#">All miRNA predictions</a> | 2.99 | <a href="#">hsa-miR-125a</a> | <a href="#">Genome browser</a> | Homo sapiens casein kinase 2, alpha 1 polypeptide (CSNK2A1), transcript variant 3, mRNA.                                              |

|                     |                              |                                       |      |                              |                                |                                                                                                                       |
|---------------------|------------------------------|---------------------------------------|------|------------------------------|--------------------------------|-----------------------------------------------------------------------------------------------------------------------|
| <a href="#">317</a> | <a href="#">NM_001895</a>    | <a href="#">All miRNA predictions</a> | 2.99 | <a href="#">hsa-miR-125a</a> | <a href="#">Genome browser</a> | Homo sapiens casein kinase 2, alpha 1 polypeptide (CSNK2A1), transcript variant 2, mRNA.                              |
| <a href="#">318</a> | <a href="#">NM_177559</a>    | <a href="#">All miRNA predictions</a> | 2.99 | <a href="#">hsa-miR-125a</a> | <a href="#">Genome browser</a> | Homo sapiens casein kinase 2, alpha 1 polypeptide (CSNK2A1), transcript variant 1, mRNA.                              |
| <a href="#">319</a> | <a href="#">NM_182757</a>    | <a href="#">All miRNA predictions</a> | 2.98 | <a href="#">hsa-miR-125a</a> | <a href="#">Genome browser</a> | Homo sapiens IBR domain containing 2 (IBRDC2), mRNA.                                                                  |
| <a href="#">320</a> | <a href="#">NM_004634</a>    | <a href="#">All miRNA predictions</a> | 2.96 | <a href="#">hsa-miR-125a</a> | <a href="#">Genome browser</a> | Homo sapiens bromodomain and PHD finger containing, 1 (BRPF1), transcript variant 2, mRNA.                            |
| <a href="#">321</a> | <a href="#">NM_175884</a>    | <a href="#">All miRNA predictions</a> | 2.96 | <a href="#">hsa-miR-125a</a> | <a href="#">Genome browser</a> | Homo sapiens hypothetical protein FLJ36031 (FLJ36031), mRNA.                                                          |
| <a href="#">322</a> | <a href="#">NM_001003694</a> | <a href="#">All miRNA predictions</a> | 2.96 | <a href="#">hsa-miR-125a</a> | <a href="#">Genome browser</a> | Homo sapiens bromodomain and PHD finger containing, 1 (BRPF1), transcript variant 1, mRNA.                            |
| <a href="#">323</a> | <a href="#">NM_194352</a>    | <a href="#">All miRNA predictions</a> | 2.95 | <a href="#">hsa-miR-125a</a> | <a href="#">Genome browser</a> | Homo sapiens ring finger protein 40 (RNF40), transcript variant 2, mRNA.                                              |
| <a href="#">324</a> | <a href="#">NM_015609</a>    | <a href="#">All miRNA predictions</a> | 2.95 | <a href="#">hsa-miR-125a</a> | <a href="#">Genome browser</a> | Homo sapiens putative MAPK activating protein PM20,PM21 (DKFZP566C0424), mRNA.                                        |
| <a href="#">325</a> | <a href="#">NM_170674</a>    | <a href="#">All miRNA predictions</a> | 2.93 | <a href="#">hsa-miR-125a</a> | <a href="#">Genome browser</a> | Homo sapiens Meis1, myeloid ecotropic viral integration site 1 homolog 2 (mouse) (MEIS2), transcript variant b, mRNA. |
| <a href="#">326</a> | <a href="#">NM_172315</a>    | <a href="#">All miRNA predictions</a> | 2.93 | <a href="#">hsa-miR-125a</a> | <a href="#">Genome browser</a> | Homo sapiens Meis1, myeloid ecotropic viral integration site 1 homolog 2 (mouse) (MEIS2), transcript variant g, mRNA. |
| <a href="#">327</a> | <a href="#">NM_002399</a>    | <a href="#">All miRNA predictions</a> | 2.93 | <a href="#">hsa-miR-125a</a> | <a href="#">Genome browser</a> | Homo sapiens Meis1, myeloid ecotropic viral integration site 1 homolog 2 (mouse) (MEIS2), transcript variant f, mRNA. |
| <a href="#">328</a> | <a href="#">NM_006268</a>    | <a href="#">All miRNA predictions</a> | 2.93 | <a href="#">hsa-miR-125a</a> | <a href="#">Genome browser</a> | Homo sapiens D4, zinc and double PHD fingers family 2 (DPF2), mRNA.                                                   |
| <a href="#">329</a> | <a href="#">NM_170677</a>    | <a href="#">All miRNA predictions</a> | 2.93 | <a href="#">hsa-miR-125a</a> | <a href="#">Genome browser</a> | Homo sapiens Meis1, myeloid ecotropic viral integration site 1 homolog 2 (mouse) (MEIS2), transcript variant a, mRNA. |
| <a href="#">330</a> | <a href="#">NM_172316</a>    | <a href="#">All miRNA predictions</a> | 2.93 | <a href="#">hsa-miR-125a</a> | <a href="#">Genome browser</a> | Homo sapiens Meis1, myeloid ecotropic viral integration site 1 homolog 2 (mouse) (MEIS2), transcript variant h, mRNA. |
| <a href="#">331</a> | <a href="#">NM_130459</a>    | <a href="#">All miRNA predictions</a> | 2.92 | <a href="#">hsa-miR-125a</a> | <a href="#">Genome browser</a> | Homo sapiens torsin family 2, member A (TOR2A), mRNA.                                                                 |
| <a href="#">332</a> | <a href="#">NM_018275</a>    | <a href="#">All miRNA predictions</a> | 2.92 | <a href="#">hsa-miR-125a</a> | <a href="#">Genome browser</a> | Homo sapiens hypothetical protein FLJ10925 (FLJ10925), mRNA.                                                          |
| <a href="#">333</a> | <a href="#">NM_018488</a>    | <a href="#">All miRNA predictions</a> | 2.92 | <a href="#">hsa-miR-125a</a> | <a href="#">Genome browser</a> | Homo sapiens T-box 4 (TBX4), mRNA.                                                                                    |
| <a href="#">334</a> | <a href="#">NM_001002847</a> | <a href="#">All miRNA predictions</a> | 2.91 | <a href="#">hsa-miR-125a</a> | <a href="#">Genome browser</a> | Homo sapiens decreased expression in renal and prostate (DERPC), transcript variant 2, mRNA.                          |
| <a href="#">335</a> | <a href="#">NM_017804</a>    | <a href="#">All miRNA predictions</a> | 2.91 | <a href="#">hsa-miR-125a</a> | <a href="#">Genome browser</a> | Homo sapiens decreased expression in renal and prostate (DERPC), transcript variant 1, mRNA.                          |
| <a href="#">336</a> | <a href="#">NM_002230</a>    | <a href="#">All miRNA predictions</a> | 2.91 | <a href="#">hsa-miR-125a</a> | <a href="#">Genome browser</a> | Homo sapiens junction plakoglobin (JUP), transcript variant 1, mRNA.                                                  |
| <a href="#">337</a> | <a href="#">NM_015975</a>    | <a href="#">All miRNA predictions</a> | 2.90 | <a href="#">hsa-miR-125a</a> | <a href="#">Genome browser</a> | Homo sapiens TAF9-like RNA polymerase II, TATA box binding protein (TBP)-associated factor, 31kDa (TAF9L), mRNA.      |
| <a href="#">338</a> | <a href="#">NM_018195</a>    | <a href="#">All miRNA predictions</a> | 2.89 | <a href="#">hsa-miR-125a</a> | <a href="#">Genome browser</a> | Homo sapiens hypothetical protein FLJ10726 (FLJ10726), mRNA.                                                          |
| <a href="#">339</a> | <a href="#">NM_019085</a>    | <a href="#">All miRNA predictions</a> | 2.89 | <a href="#">hsa-miR-125a</a> | <a href="#">Genome browser</a> | Homo sapiens F-box and leucine-rich repeat protein 19 (FBXL19), mRNA.                                                 |
| <a href="#">340</a> | <a href="#">NM_153051</a>    | <a href="#">All miRNA predictions</a> | 2.89 | <a href="#">hsa-miR-125a</a> | <a href="#">Genome browser</a> | Homo sapiens myotubularin related protein 3 (MTMR3), transcript variant 2, mRNA.                                      |
| <a href="#">341</a> | <a href="#">NM_006852</a>    | <a href="#">All miRNA predictions</a> | 2.89 | <a href="#">hsa-miR-125a</a> | <a href="#">Genome browser</a> | Homo sapiens tousled-like kinase 2 (TLK2), mRNA.                                                                      |
| <a href="#">342</a> | <a href="#">NM_021090</a>    | <a href="#">All miRNA predictions</a> | 2.89 | <a href="#">hsa-miR-125a</a> | <a href="#">Genome browser</a> | Homo sapiens myotubularin related protein 3 (MTMR3), transcript variant 3, mRNA.                                      |
| <a href="#">343</a> | <a href="#">NM_153050</a>    | <a href="#">All miRNA predictions</a> | 2.89 | <a href="#">hsa-miR-125a</a> | <a href="#">Genome browser</a> | Homo sapiens myotubularin related protein 3 (MTMR3), transcript variant 1, mRNA.                                      |
| <a href="#">344</a> | <a href="#">NM_152704</a>    | <a href="#">All miRNA predictions</a> | 2.87 | <a href="#">hsa-miR-125a</a> | <a href="#">Genome browser</a> | Homo sapiens hypothetical protein FLJ25477 (FLJ25477), transcript variant 1, mRNA.                                    |
| <a href="#">345</a> | <a href="#">NM_014764</a>    | <a href="#">All miRNA predictions</a> | 2.87 | <a href="#">hsa-miR-125a</a> | <a href="#">Genome browser</a> | Homo sapiens DAZ associated protein 2 (DAZAP2), mRNA.                                                                 |
| <a href="#">346</a> | <a href="#">NM_199138</a>    | <a href="#">All miRNA predictions</a> | 2.87 | <a href="#">hsa-miR-125a</a> | <a href="#">Genome browser</a> | Homo sapiens hypothetical protein FLJ25477 (FLJ25477), transcript variant 2, mRNA.                                    |

|                     |                              |                                       |      |                              |                                |                                                                                                                                               |
|---------------------|------------------------------|---------------------------------------|------|------------------------------|--------------------------------|-----------------------------------------------------------------------------------------------------------------------------------------------|
| <a href="#">347</a> | <a href="#">NM_170692</a>    | <a href="#">All miRNA predictions</a> | 2.85 | <a href="#">hsa-miR-125a</a> | <a href="#">Genome browser</a> | Homo sapiens RAS protein activator like 2 (RASAL2), transcript variant 2, mRNA.                                                               |
| <a href="#">348</a> | <a href="#">NM_004841</a>    | <a href="#">All miRNA predictions</a> | 2.85 | <a href="#">hsa-miR-125a</a> | <a href="#">Genome browser</a> | Homo sapiens RAS protein activator like 2 (RASAL2), transcript variant 1, mRNA.                                                               |
| <a href="#">349</a> | <a href="#">NM_153693</a>    | <a href="#">All miRNA predictions</a> | 2.84 | <a href="#">hsa-miR-125a</a> | <a href="#">Genome browser</a> | Homo sapiens homeo box C6 (HOXC6), transcript variant 2, mRNA.                                                                                |
| <a href="#">350</a> | <a href="#">NM_004503</a>    | <a href="#">All miRNA predictions</a> | 2.84 | <a href="#">hsa-miR-125a</a> | <a href="#">Genome browser</a> | Homo sapiens homeo box C6 (HOXC6), transcript variant 1, mRNA.                                                                                |
| <a href="#">351</a> | <a href="#">NM_032558</a>    | <a href="#">All miRNA predictions</a> | 2.82 | <a href="#">hsa-miR-125a</a> | <a href="#">Genome browser</a> | Homo sapiens hypothetical protein FLJ14753 (FLJ14753), mRNA.                                                                                  |
| <a href="#">352</a> | <a href="#">NM_022845</a>    | <a href="#">All miRNA predictions</a> | 2.78 | <a href="#">hsa-miR-125a</a> | <a href="#">Genome browser</a> | Homo sapiens core-binding factor, beta subunit (CBFB), transcript variant 1, mRNA.                                                            |
| <a href="#">353</a> | <a href="#">NM_005112</a>    | <a href="#">All miRNA predictions</a> | 2.77 | <a href="#">hsa-miR-125a</a> | <a href="#">Genome browser</a> | Homo sapiens WD repeat domain 1 (WDR1), transcript variant 2, mRNA.                                                                           |
| <a href="#">354</a> | <a href="#">NM_022652</a>    | <a href="#">All miRNA predictions</a> | 2.77 | <a href="#">hsa-miR-125a</a> | <a href="#">Genome browser</a> | Homo sapiens dual specificity phosphatase 6 (DUSP6), transcript variant 2, mRNA.                                                              |
| <a href="#">355</a> | <a href="#">NM_017491</a>    | <a href="#">All miRNA predictions</a> | 2.77 | <a href="#">hsa-miR-125a</a> | <a href="#">Genome browser</a> | Homo sapiens WD repeat domain 1 (WDR1), transcript variant 1, mRNA.                                                                           |
| <a href="#">356</a> | <a href="#">NM_015173</a>    | <a href="#">All miRNA predictions</a> | 2.77 | <a href="#">hsa-miR-125a</a> | <a href="#">Genome browser</a> | Homo sapiens TBC1 (tre-2/USP6, BUB2, cdc16) domain family, member 1 (TBC1D1), mRNA.                                                           |
| <a href="#">357</a> | <a href="#">NM_001001481</a> | <a href="#">All miRNA predictions</a> | 2.77 | <a href="#">hsa-miR-125a</a> | <a href="#">Genome browser</a> | Homo sapiens hypothetical protein FLJ11011 (FLJ11011), transcript variant 1, mRNA.                                                            |
| <a href="#">358</a> | <a href="#">NM_018299</a>    | <a href="#">All miRNA predictions</a> | 2.77 | <a href="#">hsa-miR-125a</a> | <a href="#">Genome browser</a> | Homo sapiens hypothetical protein FLJ11011 (FLJ11011), transcript variant 2, mRNA.                                                            |
| <a href="#">359</a> | <a href="#">NM_001946</a>    | <a href="#">All miRNA predictions</a> | 2.77 | <a href="#">hsa-miR-125a</a> | <a href="#">Genome browser</a> | Homo sapiens dual specificity phosphatase 6 (DUSP6), transcript variant 1, mRNA.                                                              |
| <a href="#">360</a> | <a href="#">NM_020676</a>    | <a href="#">All miRNA predictions</a> | 2.76 | <a href="#">hsa-miR-125a</a> | <a href="#">Genome browser</a> | Homo sapiens abhydrolase domain containing 6 (ABHD6), mRNA.                                                                                   |
| <a href="#">361</a> | <a href="#">NM_002719</a>    | <a href="#">All miRNA predictions</a> | 2.74 | <a href="#">hsa-miR-125a</a> | <a href="#">Genome browser</a> | Homo sapiens protein phosphatase 2, regulatory subunit B (B56), gamma isoform (PPP2R5C), transcript variant 1, mRNA.                          |
| <a href="#">362</a> | <a href="#">NM_005985</a>    | <a href="#">All miRNA predictions</a> | 2.74 | <a href="#">hsa-miR-125a</a> | <a href="#">Genome browser</a> | Homo sapiens snail homolog 1 (Drosophila) (SNAI1), mRNA.                                                                                      |
| <a href="#">363</a> | <a href="#">NM_178586</a>    | <a href="#">All miRNA predictions</a> | 2.74 | <a href="#">hsa-miR-125a</a> | <a href="#">Genome browser</a> | Homo sapiens protein phosphatase 2, regulatory subunit B (B56), gamma isoform (PPP2R5C), transcript variant 2, mRNA.                          |
| <a href="#">364</a> | <a href="#">NM_001755</a>    | <a href="#">All miRNA predictions</a> | 2.74 | <a href="#">hsa-miR-125a</a> | <a href="#">Genome browser</a> | Homo sapiens core-binding factor, beta subunit (CBFB), transcript variant 2, mRNA.                                                            |
| <a href="#">365</a> | <a href="#">NM_032431</a>    | <a href="#">All miRNA predictions</a> | 2.73 | <a href="#">hsa-miR-125a</a> | <a href="#">Genome browser</a> | Homo sapiens synovial apoptosis inhibitor 1, synoviolin (SYVN1), transcript variant 1, mRNA.                                                  |
| <a href="#">366</a> | <a href="#">NM_172230</a>    | <a href="#">All miRNA predictions</a> | 2.73 | <a href="#">hsa-miR-125a</a> | <a href="#">Genome browser</a> | Homo sapiens synovial apoptosis inhibitor 1, synoviolin (SYVN1), transcript variant 2, mRNA.                                                  |
| <a href="#">367</a> | <a href="#">NM_032181</a>    | <a href="#">All miRNA predictions</a> | 2.72 | <a href="#">hsa-miR-125a</a> | <a href="#">Genome browser</a> | Homo sapiens hypothetical protein FLJ13391 (FLJ13391), mRNA.                                                                                  |
| <a href="#">368</a> | <a href="#">NM_014112</a>    | <a href="#">All miRNA predictions</a> | 2.72 | <a href="#">hsa-miR-125a</a> | <a href="#">Genome browser</a> | Homo sapiens trichorhinophalangeal syndrome I (TRPS1), mRNA.                                                                                  |
| <a href="#">369</a> | <a href="#">NM_007007</a>    | <a href="#">All miRNA predictions</a> | 2.71 | <a href="#">hsa-miR-125a</a> | <a href="#">Genome browser</a> | Homo sapiens cleavage and polyadenylation specific factor 6, 68kDa (CPSF6), mRNA.                                                             |
| <a href="#">370</a> | <a href="#">NM_002355</a>    | <a href="#">All miRNA predictions</a> | 2.70 | <a href="#">hsa-miR-125a</a> | <a href="#">Genome browser</a> | Homo sapiens mannose-6-phosphate receptor (cation dependent) (M6PR), mRNA.                                                                    |
| <a href="#">371</a> | <a href="#">NM_198513</a>    | <a href="#">All miRNA predictions</a> | 2.69 | <a href="#">hsa-miR-125a</a> | <a href="#">Genome browser</a> | Homo sapiens CGI-72 protein (CGI-72), transcript variant 3, mRNA.                                                                             |
| <a href="#">372</a> | <a href="#">NM_024878</a>    | <a href="#">All miRNA predictions</a> | 2.69 | <a href="#">hsa-miR-125a</a> | <a href="#">Genome browser</a> | Homo sapiens CGI-72 protein (CGI-72), transcript variant 4, mRNA.                                                                             |
| <a href="#">373</a> | <a href="#">NM_182907</a>    | <a href="#">All miRNA predictions</a> | 2.68 | <a href="#">hsa-miR-125a</a> | <a href="#">Genome browser</a> | Homo sapiens PR domain containing 1, with ZNF domain (PRDM1), transcript variant 2, mRNA.                                                     |
| <a href="#">374</a> | <a href="#">NM_001001482</a> | <a href="#">All miRNA predictions</a> | 2.68 | <a href="#">hsa-miR-125a</a> | <a href="#">Genome browser</a> | Homo sapiens hypothetical protein FLJ11011 (FLJ11011), transcript variant 3, mRNA.                                                            |
| <a href="#">375</a> | <a href="#">NM_001198</a>    | <a href="#">All miRNA predictions</a> | 2.68 | <a href="#">hsa-miR-125a</a> | <a href="#">Genome browser</a> | Homo sapiens PR domain containing 1, with ZNF domain (PRDM1), transcript variant 1, mRNA.                                                     |
| <a href="#">376</a> | <a href="#">NM_006378</a>    | <a href="#">All miRNA predictions</a> | 2.67 | <a href="#">hsa-miR-125a</a> | <a href="#">Genome browser</a> | Homo sapiens sema domain, immunoglobulin domain (Ig), transmembrane domain (TM) and short cytoplasmic domain, (semaphorin) 4D (SEMA4D), mRNA. |
| <a href="#">377</a> | <a href="#">NM_004438</a>    | <a href="#">All miRNA</a>             | 2.67 | <a href="#">hsa-miR-</a>     | <a href="#">Genome</a>         | Homo sapiens EPH receptor A4 (EPHA4), mRNA.                                                                                                   |

|                     |                           | predictions                           |      | 125a                         | browser                        |                                                                                                                                                                                                                                                 |
|---------------------|---------------------------|---------------------------------------|------|------------------------------|--------------------------------|-------------------------------------------------------------------------------------------------------------------------------------------------------------------------------------------------------------------------------------------------|
| <a href="#">378</a> | <a href="#">NM_015265</a> | <a href="#">All miRNA predictions</a> | 2.66 | <a href="#">hsa-miR-125a</a> | <a href="#">Genome browser</a> | Homo sapiens SATB family member 2 (SATB2), mRNA.                                                                                                                                                                                                |
| <a href="#">379</a> | <a href="#">NM_017927</a> | <a href="#">All miRNA predictions</a> | 2.66 | <a href="#">hsa-miR-125a</a> | <a href="#">Genome browser</a> | Homo sapiens mitofusin 1 (MFN1), nuclear gene encoding mitochondrial protein, transcript variant 2, mRNA.                                                                                                                                       |
| <a href="#">380</a> | <a href="#">NM_005477</a> | <a href="#">All miRNA predictions</a> | 2.65 | <a href="#">hsa-miR-125a</a> | <a href="#">Genome browser</a> | Homo sapiens hyperpolarization activated cyclic nucleotide-gated potassium channel 4 (HCN4), mRNA.                                                                                                                                              |
| <a href="#">381</a> | <a href="#">NM_001095</a> | <a href="#">All miRNA predictions</a> | 2.65 | <a href="#">hsa-miR-125a</a> | <a href="#">Genome browser</a> | Homo sapiens amiloride-sensitive cation channel 2, neuronal (ACCN2), transcript variant 2, mRNA.                                                                                                                                                |
| <a href="#">382</a> | <a href="#">NM_033083</a> | <a href="#">All miRNA predictions</a> | 2.65 | <a href="#">hsa-miR-125a</a> | <a href="#">Genome browser</a> | Homo sapiens ELL associated factor 1 (EAF1), mRNA.                                                                                                                                                                                              |
| <a href="#">383</a> | <a href="#">NM_020834</a> | <a href="#">All miRNA predictions</a> | 2.65 | <a href="#">hsa-miR-125a</a> | <a href="#">Genome browser</a> | Homo sapiens KIAA1443 (KIAA1443), mRNA.                                                                                                                                                                                                         |
| <a href="#">384</a> | <a href="#">NM_020039</a> | <a href="#">All miRNA predictions</a> | 2.65 | <a href="#">hsa-miR-125a</a> | <a href="#">Genome browser</a> | Homo sapiens amiloride-sensitive cation channel 2, neuronal (ACCN2), transcript variant 1, mRNA.                                                                                                                                                |
| <a href="#">385</a> | <a href="#">NM_020149</a> | <a href="#">All miRNA predictions</a> | 2.64 | <a href="#">hsa-miR-125a</a> | <a href="#">Genome browser</a> | Homo sapiens Meis1, myeloid ecotropic viral integration site 1 homolog 2 (mouse) (MEIS2), transcript variant e, mRNA.                                                                                                                           |
| <a href="#">386</a> | <a href="#">NM_002310</a> | <a href="#">All miRNA predictions</a> | 2.64 | <a href="#">hsa-miR-125a</a> | <a href="#">Genome browser</a> | Homo sapiens leukemia inhibitory factor receptor (LIFR), mRNA.                                                                                                                                                                                  |
| <a href="#">387</a> | <a href="#">NM_014761</a> | <a href="#">All miRNA predictions</a> | 2.64 | <a href="#">hsa-miR-125a</a> | <a href="#">Genome browser</a> | Homo sapiens KIAA0174 gene product (KIAA0174), mRNA.                                                                                                                                                                                            |
| <a href="#">388</a> | <a href="#">NM_005099</a> | <a href="#">All miRNA predictions</a> | 2.61 | <a href="#">hsa-miR-125a</a> | <a href="#">Genome browser</a> | Homo sapiens a disintegrin-like and metalloprotease (reprolysin type) with thrombospondin type 1 motif, 4 (ADAMTS4), mRNA.                                                                                                                      |
| <a href="#">389</a> | <a href="#">NM_207313</a> | <a href="#">All miRNA predictions</a> | 2.61 | <a href="#">hsa-miR-125a</a> | <a href="#">Genome browser</a> | Homo sapiens hypothetical protein LOC124842 (LOC124842), mRNA.                                                                                                                                                                                  |
| <a href="#">390</a> | <a href="#">NM_001702</a> | <a href="#">All miRNA predictions</a> | 2.60 | <a href="#">hsa-miR-125a</a> | <a href="#">Genome browser</a> | Homo sapiens brain-specific angiogenesis inhibitor 1 (BAI1), mRNA.                                                                                                                                                                              |
| <a href="#">391</a> | <a href="#">NM_016531</a> | <a href="#">All miRNA predictions</a> | 2.59 | <a href="#">hsa-miR-125a</a> | <a href="#">Genome browser</a> | Homo sapiens Kruppel-like factor 3 (basic) (KLF3), mRNA.                                                                                                                                                                                        |
| <a href="#">392</a> | <a href="#">NM_006464</a> | <a href="#">All miRNA predictions</a> | 2.59 | <a href="#">hsa-miR-125a</a> | <a href="#">Genome browser</a> | Homo sapiens trans-golgi network protein 2 (TGOLN2), mRNA.                                                                                                                                                                                      |
| <a href="#">393</a> | <a href="#">NM_005911</a> | <a href="#">All miRNA predictions</a> | 2.59 | <a href="#">hsa-miR-125a</a> | <a href="#">Genome browser</a> | Homo sapiens methionine adenosyltransferase II, alpha (MAT2A), mRNA.                                                                                                                                                                            |
| <a href="#">394</a> | <a href="#">NM_022822</a> | <a href="#">All miRNA predictions</a> | 2.59 | <a href="#">hsa-miR-125a</a> | <a href="#">Genome browser</a> | Homo sapiens likely ortholog of kinesin light chain 2 (KLC2), mRNA.                                                                                                                                                                             |
| <a href="#">395</a> | <a href="#">NM_002703</a> | <a href="#">All miRNA predictions</a> | 2.58 | <a href="#">hsa-miR-125a</a> | <a href="#">Genome browser</a> | Homo sapiens phosphoribosyl pyrophosphate amidotransferase (PPAT), mRNA.                                                                                                                                                                        |
| <a href="#">396</a> | <a href="#">NM_153020</a> | <a href="#">All miRNA predictions</a> | 2.57 | <a href="#">hsa-miR-125a</a> | <a href="#">Genome browser</a> | Homo sapiens RNA binding motif protein 24 (RBM24), mRNA.                                                                                                                                                                                        |
| <a href="#">397</a> | <a href="#">NM_017789</a> | <a href="#">All miRNA predictions</a> | 2.57 | <a href="#">hsa-miR-125a</a> | <a href="#">Genome browser</a> | Homo sapiens sema domain, immunoglobulin domain (Ig), transmembrane domain (TM) and short cytoplasmic domain, (semaphorin) 4C (SEMA4C), mRNA.                                                                                                   |
| <a href="#">398</a> | <a href="#">NM_018650</a> | <a href="#">All miRNA predictions</a> | 2.56 | <a href="#">hsa-miR-125a</a> | <a href="#">Genome browser</a> | Homo sapiens MAP/microtubule affinity-regulating kinase 1 (MARK1), mRNA.                                                                                                                                                                        |
| <a href="#">399</a> | <a href="#">NM_002953</a> | <a href="#">All miRNA predictions</a> | 2.56 | <a href="#">hsa-miR-125a</a> | <a href="#">Genome browser</a> | Homo sapiens ribosomal protein S6 kinase, 90kDa, polypeptide 1 (RPS6KA1), transcript variant 1, mRNA.                                                                                                                                           |
| <a href="#">400</a> | <a href="#">NM_023029</a> | <a href="#">All miRNA predictions</a> | 2.55 | <a href="#">hsa-miR-125a</a> | <a href="#">Genome browser</a> | Homo sapiens fibroblast growth factor receptor 2 (bacteria-expressed kinase, keratinocyte growth factor receptor, craniofacial dysostosis 1, Crouzon syndrome, Pfeiffer syndrome, Jackson-Weiss syndrome) (FGFR2), transcript variant 11, mRNA. |
| <a href="#">401</a> | <a href="#">NM_006091</a> | <a href="#">All miRNA predictions</a> | 2.55 | <a href="#">hsa-miR-125a</a> | <a href="#">Genome browser</a> | Homo sapiens coronin, actin binding protein, 2B (CORO2B), mRNA.                                                                                                                                                                                 |
| <a href="#">402</a> | <a href="#">NM_023031</a> | <a href="#">All miRNA predictions</a> | 2.55 | <a href="#">hsa-miR-125a</a> | <a href="#">Genome browser</a> | Homo sapiens fibroblast growth factor receptor 2 (bacteria-expressed kinase, keratinocyte growth factor receptor, craniofacial dysostosis 1, Crouzon syndrome, Pfeiffer syndrome, Jackson-Weiss syndrome) (FGFR2), transcript variant 13, mRNA. |
| <a href="#">403</a> | <a href="#">NM_000141</a> | <a href="#">All miRNA predictions</a> | 2.55 | <a href="#">hsa-miR-125a</a> | <a href="#">Genome browser</a> | Homo sapiens fibroblast growth factor receptor 2 (bacteria-expressed kinase, keratinocyte growth factor receptor, craniofacial dysostosis 1, Crouzon                                                                                            |

|                     |                           |                                       |      |                              |                                |                                                                                                                                                                                                                                                 |
|---------------------|---------------------------|---------------------------------------|------|------------------------------|--------------------------------|-------------------------------------------------------------------------------------------------------------------------------------------------------------------------------------------------------------------------------------------------|
|                     |                           |                                       |      |                              |                                | syndrome, Pfeiffer syndrome, Jackson-Weiss syndrome) (FGFR2), transcript variant 1, mRNA.                                                                                                                                                       |
| <a href="#">404</a> | <a href="#">NM_023030</a> | <a href="#">All miRNA predictions</a> | 2.55 | <a href="#">hsa-miR-125a</a> | <a href="#">Genome browser</a> | Homo sapiens fibroblast growth factor receptor 2 (bacteria-expressed kinase, keratinocyte growth factor receptor, craniofacial dysostosis 1, Crouzon syndrome, Pfeiffer syndrome, Jackson-Weiss syndrome) (FGFR2), transcript variant 12, mRNA. |
| <a href="#">405</a> | <a href="#">NM_022975</a> | <a href="#">All miRNA predictions</a> | 2.55 | <a href="#">hsa-miR-125a</a> | <a href="#">Genome browser</a> | Homo sapiens fibroblast growth factor receptor 2 (bacteria-expressed kinase, keratinocyte growth factor receptor, craniofacial dysostosis 1, Crouzon syndrome, Pfeiffer syndrome, Jackson-Weiss syndrome) (FGFR2), transcript variant 8, mRNA.  |
| <a href="#">406</a> | <a href="#">NM_022969</a> | <a href="#">All miRNA predictions</a> | 2.55 | <a href="#">hsa-miR-125a</a> | <a href="#">Genome browser</a> | Homo sapiens fibroblast growth factor receptor 2 (bacteria-expressed kinase, keratinocyte growth factor receptor, craniofacial dysostosis 1, Crouzon syndrome, Pfeiffer syndrome, Jackson-Weiss syndrome) (FGFR2), transcript variant 2, mRNA.  |
| <a href="#">407</a> | <a href="#">NM_022970</a> | <a href="#">All miRNA predictions</a> | 2.55 | <a href="#">hsa-miR-125a</a> | <a href="#">Genome browser</a> | Homo sapiens fibroblast growth factor receptor 2 (bacteria-expressed kinase, keratinocyte growth factor receptor, craniofacial dysostosis 1, Crouzon syndrome, Pfeiffer syndrome, Jackson-Weiss syndrome) (FGFR2), transcript variant 3, mRNA.  |
| <a href="#">408</a> | <a href="#">NM_022972</a> | <a href="#">All miRNA predictions</a> | 2.55 | <a href="#">hsa-miR-125a</a> | <a href="#">Genome browser</a> | Homo sapiens fibroblast growth factor receptor 2 (bacteria-expressed kinase, keratinocyte growth factor receptor, craniofacial dysostosis 1, Crouzon syndrome, Pfeiffer syndrome, Jackson-Weiss syndrome) (FGFR2), transcript variant 5, mRNA.  |
| <a href="#">409</a> | <a href="#">NM_000165</a> | <a href="#">All miRNA predictions</a> | 2.53 | <a href="#">hsa-miR-125a</a> | <a href="#">Genome browser</a> | Homo sapiens gap junction protein, alpha 1, 43kDa (connexin 43) (GJA1), mRNA.                                                                                                                                                                   |
| <a href="#">410</a> | <a href="#">NM_032982</a> | <a href="#">All miRNA predictions</a> | 2.52 | <a href="#">hsa-miR-125a</a> | <a href="#">Genome browser</a> | Homo sapiens caspase 2, apoptosis-related cysteine protease (neural precursor cell expressed, developmentally down-regulated 2) (CASP2), transcript variant 1, mRNA.                                                                            |
| <a href="#">411</a> | <a href="#">NM_058172</a> | <a href="#">All miRNA predictions</a> | 2.52 | <a href="#">hsa-miR-125a</a> | <a href="#">Genome browser</a> | Homo sapiens anthrax toxin receptor 2 (ANTXR2), mRNA.                                                                                                                                                                                           |
| <a href="#">412</a> | <a href="#">NM_018963</a> | <a href="#">All miRNA predictions</a> | 2.50 | <a href="#">hsa-miR-125a</a> | <a href="#">Genome browser</a> | Homo sapiens WD repeat domain 9 (WDR9), transcript variant 1, mRNA.                                                                                                                                                                             |
| <a href="#">413</a> | <a href="#">NM_020390</a> | <a href="#">All miRNA predictions</a> | 2.50 | <a href="#">hsa-miR-125a</a> | <a href="#">Genome browser</a> | Homo sapiens eukaryotic translation initiation factor 5A2 (EIF5A2), mRNA.                                                                                                                                                                       |
| <a href="#">414</a> | <a href="#">NM_001949</a> | <a href="#">All miRNA predictions</a> | 2.50 | <a href="#">hsa-miR-125a</a> | <a href="#">Genome browser</a> | Homo sapiens E2F transcription factor 3 (E2F3), mRNA.                                                                                                                                                                                           |
| <a href="#">415</a> | <a href="#">NM_005094</a> | <a href="#">All miRNA predictions</a> | 2.50 | <a href="#">hsa-miR-125a</a> | <a href="#">Genome browser</a> | Homo sapiens solute carrier family 27 (fatty acid transporter), member 4 (SLC27A4), mRNA.                                                                                                                                                       |
| <a href="#">416</a> | <a href="#">NM_023028</a> | <a href="#">All miRNA predictions</a> | 2.48 | <a href="#">hsa-miR-125a</a> | <a href="#">Genome browser</a> | Homo sapiens fibroblast growth factor receptor 2 (bacteria-expressed kinase, keratinocyte growth factor receptor, craniofacial dysostosis 1, Crouzon syndrome, Pfeiffer syndrome, Jackson-Weiss syndrome) (FGFR2), transcript variant 10, mRNA. |
| <a href="#">417</a> | <a href="#">NM_206855</a> | <a href="#">All miRNA predictions</a> | 2.48 | <a href="#">hsa-miR-125a</a> | <a href="#">Genome browser</a> | Homo sapiens quaking homolog, KH domain RNA binding (mouse) (QKI), transcript variant 4, mRNA.                                                                                                                                                  |
| <a href="#">418</a> | <a href="#">NM_001773</a> | <a href="#">All miRNA predictions</a> | 2.47 | <a href="#">hsa-miR-125a</a> | <a href="#">Genome browser</a> | Homo sapiens CD34 antigen (CD34), mRNA.                                                                                                                                                                                                         |
| <a href="#">419</a> | <a href="#">NM_024954</a> | <a href="#">All miRNA predictions</a> | 2.46 | <a href="#">hsa-miR-125a</a> | <a href="#">Genome browser</a> | Homo sapiens ubiquitin domain containing 1 (UBTD1), mRNA.                                                                                                                                                                                       |
| <a href="#">420</a> | <a href="#">NM_080862</a> | <a href="#">All miRNA predictions</a> | 2.46 | <a href="#">hsa-miR-125a</a> | <a href="#">Genome browser</a> | Homo sapiens SPRY domain-containing SOCS box protein SSB-4 (SSB4), mRNA.                                                                                                                                                                        |
| <a href="#">421</a> | <a href="#">NM_014006</a> | <a href="#">All miRNA predictions</a> | 2.44 | <a href="#">hsa-miR-125a</a> | <a href="#">Genome browser</a> | Homo sapiens PI-3-kinase-related kinase SMG-1 (SMG1), transcript variant 2, mRNA.                                                                                                                                                               |
| <a href="#">422</a> | <a href="#">NM_014912</a> | <a href="#">All miRNA predictions</a> | 2.44 | <a href="#">hsa-miR-125a</a> | <a href="#">Genome browser</a> | Homo sapiens cytoplasmic polyadenylation element binding protein 3 (CPEB3), mRNA.                                                                                                                                                               |
| <a href="#">423</a> | <a href="#">NM_015092</a> | <a href="#">All miRNA predictions</a> | 2.44 | <a href="#">hsa-miR-125a</a> | <a href="#">Genome browser</a> | Homo sapiens PI-3-kinase-related kinase SMG-1 (SMG1), transcript variant 1, mRNA.                                                                                                                                                               |
| <a href="#">424</a> | <a href="#">NM_014682</a> | <a href="#">All miRNA predictions</a> | 2.43 | <a href="#">hsa-miR-125a</a> | <a href="#">Genome browser</a> | Homo sapiens suppression of tumorigenicity 18 (breast carcinoma) (zinc finger protein) (ST18), mRNA.                                                                                                                                            |
| <a href="#">425</a> | <a href="#">NM_153043</a> | <a href="#">All miRNA predictions</a> | 2.43 | <a href="#">hsa-miR-125a</a> | <a href="#">Genome browser</a> | Homo sapiens hypothetical protein FLJ37078 (FLJ37078), mRNA.                                                                                                                                                                                    |
| <a href="#">426</a> | <a href="#">NM_022730</a> | <a href="#">All miRNA predictions</a> | 2.43 | <a href="#">hsa-miR-125a</a> | <a href="#">Genome browser</a> | Homo sapiens COP9 constitutive photomorphogenic homolog subunit 7B (Arabidopsis) (COPS7B), mRNA.                                                                                                                                                |

|                     |                              |                                       |      |                              |                                |                                                                                                                                              |
|---------------------|------------------------------|---------------------------------------|------|------------------------------|--------------------------------|----------------------------------------------------------------------------------------------------------------------------------------------|
| <a href="#">427</a> | <a href="#">NM_025154</a>    | <a href="#">All miRNA predictions</a> | 2.42 | <a href="#">hsa-miR-125a</a> | <a href="#">Genome browser</a> | Homo sapiens unc-84 homolog A (C. elegans) (UNC84A), mRNA.                                                                                   |
| <a href="#">428</a> | <a href="#">NM_012294</a>    | <a href="#">All miRNA predictions</a> | 2.42 | <a href="#">hsa-miR-125a</a> | <a href="#">Genome browser</a> | Homo sapiens Rap guanine nucleotide exchange factor (GEF) 5 (RAPGEF5), mRNA.                                                                 |
| <a href="#">429</a> | <a href="#">NM_003173</a>    | <a href="#">All miRNA predictions</a> | 2.42 | <a href="#">hsa-miR-125a</a> | <a href="#">Genome browser</a> | Homo sapiens suppressor of variegation 3-9 homolog 1 (Drosophila) (SUV39H1), mRNA.                                                           |
| <a href="#">430</a> | <a href="#">NM_014409</a>    | <a href="#">All miRNA predictions</a> | 2.42 | <a href="#">hsa-miR-125a</a> | <a href="#">Genome browser</a> | Homo sapiens TAF5-like RNA polymerase II, p300/CBP-associated factor (PCAF)-associated factor, 65kDa (TAF5L), mRNA.                          |
| <a href="#">431</a> | <a href="#">NM_173822</a>    | <a href="#">All miRNA predictions</a> | 2.42 | <a href="#">hsa-miR-125a</a> | <a href="#">Genome browser</a> | Homo sapiens hypothetical protein MGC39518 (MGC39518), mRNA.                                                                                 |
| <a href="#">432</a> | <a href="#">NM_006403</a>    | <a href="#">All miRNA predictions</a> | 2.40 | <a href="#">hsa-miR-125a</a> | <a href="#">Genome browser</a> | Homo sapiens neural precursor cell expressed, developmentally down-regulated 9 (NEDD9), mRNA.                                                |
| <a href="#">433</a> | <a href="#">NM_001408</a>    | <a href="#">All miRNA predictions</a> | 2.40 | <a href="#">hsa-miR-125a</a> | <a href="#">Genome browser</a> | Homo sapiens cadherin, EGF LAG seven-pass G-type receptor 2 (flamingo homolog, Drosophila) (CELSR2), mRNA.                                   |
| <a href="#">434</a> | <a href="#">NM_001001924</a> | <a href="#">All miRNA predictions</a> | 2.38 | <a href="#">hsa-miR-125a</a> | <a href="#">Genome browser</a> | Homo sapiens mitochondrial tumor suppressor 1 (MTUS1), nuclear gene encoding mitochondrial protein, transcript variant 1, mRNA.              |
| <a href="#">435</a> | <a href="#">NM_144599</a>    | <a href="#">All miRNA predictions</a> | 2.38 | <a href="#">hsa-miR-125a</a> | <a href="#">Genome browser</a> | Homo sapiens non imprinted in Prader-Willi/Angelman syndrome 1 (NIPA1), mRNA.                                                                |
| <a href="#">436</a> | <a href="#">NM_001001931</a> | <a href="#">All miRNA predictions</a> | 2.38 | <a href="#">hsa-miR-125a</a> | <a href="#">Genome browser</a> | Homo sapiens mitochondrial tumor suppressor 1 (MTUS1), nuclear gene encoding mitochondrial protein, transcript variant 4, mRNA.              |
| <a href="#">437</a> | <a href="#">NM_001001925</a> | <a href="#">All miRNA predictions</a> | 2.38 | <a href="#">hsa-miR-125a</a> | <a href="#">Genome browser</a> | Homo sapiens mitochondrial tumor suppressor 1 (MTUS1), nuclear gene encoding mitochondrial protein, transcript variant 2, mRNA.              |
| <a href="#">438</a> | <a href="#">NM_020749</a>    | <a href="#">All miRNA predictions</a> | 2.38 | <a href="#">hsa-miR-125a</a> | <a href="#">Genome browser</a> | Homo sapiens mitochondrial tumor suppressor 1 (MTUS1), nuclear gene encoding mitochondrial protein, transcript variant 5, mRNA.              |
| <a href="#">439</a> | <a href="#">NM_001879</a>    | <a href="#">All miRNA predictions</a> | 2.37 | <a href="#">hsa-miR-125a</a> | <a href="#">Genome browser</a> | Homo sapiens mannan-binding lectin serine protease 1 (C4/C2 activating component of Ra-reactive factor) (MASP1), transcript variant 1, mRNA. |
| <a href="#">440</a> | <a href="#">NM_145818</a>    | <a href="#">All miRNA predictions</a> | 2.37 | <a href="#">hsa-miR-125a</a> | <a href="#">Genome browser</a> | Homo sapiens component of oligomeric golgi complex 4 (COG4), transcript variant Cog4S, mRNA.                                                 |
| <a href="#">441</a> | <a href="#">NM_012266</a>    | <a href="#">All miRNA predictions</a> | 2.37 | <a href="#">hsa-miR-125a</a> | <a href="#">Genome browser</a> | Homo sapiens DnaJ (Hsp40) homolog, subfamily B, member 5 (DNAJB5), mRNA.                                                                     |
| <a href="#">442</a> | <a href="#">NM_017554</a>    | <a href="#">All miRNA predictions</a> | 2.36 | <a href="#">hsa-miR-125a</a> | <a href="#">Genome browser</a> | Homo sapiens poly (ADP-ribose) polymerase family, member 14 (PARP14), mRNA.                                                                  |
| <a href="#">443</a> | <a href="#">NM_014729</a>    | <a href="#">All miRNA predictions</a> | 2.35 | <a href="#">hsa-miR-125a</a> | <a href="#">Genome browser</a> | Homo sapiens thymus high mobility group box protein TOX (TOX), mRNA.                                                                         |
| <a href="#">444</a> | <a href="#">NM_018375</a>    | <a href="#">All miRNA predictions</a> | 2.35 | <a href="#">hsa-miR-125a</a> | <a href="#">Genome browser</a> | Homo sapiens solute carrier family 39 (zinc transporter), member 9 (SLC39A9), mRNA.                                                          |
| <a href="#">445</a> | <a href="#">NM_206835</a>    | <a href="#">All miRNA predictions</a> | 2.34 | <a href="#">hsa-miR-125a</a> | <a href="#">Genome browser</a> | Homo sapiens TNF receptor-associated factor 7 (TRAF7), transcript variant 2, mRNA.                                                           |
| <a href="#">446</a> | <a href="#">NM_007359</a>    | <a href="#">All miRNA predictions</a> | 2.33 | <a href="#">hsa-miR-125a</a> | <a href="#">Genome browser</a> | Homo sapiens cancer susceptibility candidate 3 (CASC3), mRNA.                                                                                |
| <a href="#">447</a> | <a href="#">NM_000723</a>    | <a href="#">All miRNA predictions</a> | 2.33 | <a href="#">hsa-miR-125a</a> | <a href="#">Genome browser</a> | Homo sapiens calcium channel, voltage-dependent, beta 1 subunit (CACNB1), transcript variant 1, mRNA.                                        |
| <a href="#">448</a> | <a href="#">NM_019074</a>    | <a href="#">All miRNA predictions</a> | 2.32 | <a href="#">hsa-miR-125a</a> | <a href="#">Genome browser</a> | Homo sapiens delta-like 4 (Drosophila) (DLL4), mRNA.                                                                                         |
| <a href="#">449</a> | <a href="#">NM_198549</a>    | <a href="#">All miRNA predictions</a> | 2.32 | <a href="#">hsa-miR-125a</a> | <a href="#">Genome browser</a> | Homo sapiens FLJ35093 protein (FLJ35093), mRNA.                                                                                              |
| <a href="#">450</a> | <a href="#">NM_194294</a>    | <a href="#">All miRNA predictions</a> | 2.31 | <a href="#">hsa-miR-125a</a> | <a href="#">Genome browser</a> | Homo sapiens hypothetical protein LOC169355 (LOC169355), mRNA.                                                                               |
| <a href="#">451</a> | <a href="#">NM_017486</a>    | <a href="#">All miRNA predictions</a> | 2.31 | <a href="#">hsa-miR-125a</a> | <a href="#">Genome browser</a> | Homo sapiens adducin 2 (beta) (ADD2), transcript variant beta-6a, mRNA.                                                                      |
| <a href="#">452</a> | <a href="#">NM_001617</a>    | <a href="#">All miRNA predictions</a> | 2.31 | <a href="#">hsa-miR-125a</a> | <a href="#">Genome browser</a> | Homo sapiens adducin 2 (beta) (ADD2), transcript variant beta-1, mRNA.                                                                       |
| <a href="#">453</a> | <a href="#">NM_017483</a>    | <a href="#">All miRNA predictions</a> | 2.31 | <a href="#">hsa-miR-125a</a> | <a href="#">Genome browser</a> | Homo sapiens adducin 2 (beta) (ADD2), transcript variant beta-3a, mRNA.                                                                      |
| <a href="#">454</a> | <a href="#">NM_017485</a>    | <a href="#">All miRNA predictions</a> | 2.31 | <a href="#">hsa-miR-125a</a> | <a href="#">Genome browser</a> | Homo sapiens adducin 2 (beta) (ADD2), transcript variant beta-5a, mRNA.                                                                      |
| <a href="#">455</a> | <a href="#">NM_030927</a>    | <a href="#">All miRNA predictions</a> | 2.29 | <a href="#">hsa-miR-125a</a> | <a href="#">Genome browser</a> | Homo sapiens transmembrane 4 superfamily member 14 (TM4SF14), mRNA.                                                                          |
| <a href="#">456</a> | <a href="#">NM_018330</a>    | <a href="#">All miRNA</a>             | 2.27 | <a href="#">hsa-miR-</a>     | <a href="#">Genome</a>         | Homo sapiens KIAA1598 (KIAA1598), mRNA.                                                                                                      |



|                     |                              | <a href="#">predictions</a>           |      | <a href="#">125a</a>         | <a href="#">browser</a>        |                                                                                                                                                                      |
|---------------------|------------------------------|---------------------------------------|------|------------------------------|--------------------------------|----------------------------------------------------------------------------------------------------------------------------------------------------------------------|
| <a href="#">457</a> | <a href="#">NM_138494</a>    | <a href="#">All miRNA predictions</a> | 2.26 | <a href="#">hsa-miR-125a</a> | <a href="#">Genome browser</a> | Homo sapiens vav-1 interacting Kruppel-like protein (VIK), transcript variant 1, mRNA.                                                                               |
| <a href="#">458</a> | <a href="#">NM_206902</a>    | <a href="#">All miRNA predictions</a> | 2.23 | <a href="#">hsa-miR-125a</a> | <a href="#">Genome browser</a> | Homo sapiens reticulon 2 (RTN2), transcript variant 4, mRNA.                                                                                                         |
| <a href="#">459</a> | <a href="#">NM_003155</a>    | <a href="#">All miRNA predictions</a> | 2.22 | <a href="#">hsa-miR-125a</a> | <a href="#">Genome browser</a> | Homo sapiens stanniocalcin 1 (STC1), mRNA.                                                                                                                           |
| <a href="#">460</a> | <a href="#">NM_032827</a>    | <a href="#">All miRNA predictions</a> | 2.22 | <a href="#">hsa-miR-125a</a> | <a href="#">Genome browser</a> | Homo sapiens atonal homolog 8 (Drosophila) (ATOH8), mRNA.                                                                                                            |
| <a href="#">461</a> | <a href="#">NM_018992</a>    | <a href="#">All miRNA predictions</a> | 2.21 | <a href="#">hsa-miR-125a</a> | <a href="#">Genome browser</a> | Homo sapiens potassium channel tetramerisation domain containing 5 (KCTD5), mRNA.                                                                                    |
| <a href="#">462</a> | <a href="#">NM_022763</a>    | <a href="#">All miRNA predictions</a> | 2.21 | <a href="#">hsa-miR-125a</a> | <a href="#">Genome browser</a> | Homo sapiens factor for adipocyte differentiation 104 (FAD104), mRNA.                                                                                                |
| <a href="#">463</a> | <a href="#">NM_004907</a>    | <a href="#">All miRNA predictions</a> | 2.20 | <a href="#">hsa-miR-125a</a> | <a href="#">Genome browser</a> | Homo sapiens immediate early response 2 (IER2), mRNA.                                                                                                                |
| <a href="#">464</a> | <a href="#">NM_152383</a>    | <a href="#">All miRNA predictions</a> | 2.18 | <a href="#">hsa-miR-125a</a> | <a href="#">Genome browser</a> | Homo sapiens hypothetical protein MGC42174 (MGC42174), mRNA.                                                                                                         |
| <a href="#">465</a> | <a href="#">NM_006275</a>    | <a href="#">All miRNA predictions</a> | 2.18 | <a href="#">hsa-miR-125a</a> | <a href="#">Genome browser</a> | Homo sapiens splicing factor, arginine/serine-rich 6 (SFRS6), mRNA.                                                                                                  |
| <a href="#">466</a> | <a href="#">NM_018320</a>    | <a href="#">All miRNA predictions</a> | 2.16 | <a href="#">hsa-miR-125a</a> | <a href="#">Genome browser</a> | Homo sapiens ring finger protein 121 (RNF121), transcript variant 1, mRNA.                                                                                           |
| <a href="#">467</a> | <a href="#">NM_194453</a>    | <a href="#">All miRNA predictions</a> | 2.16 | <a href="#">hsa-miR-125a</a> | <a href="#">Genome browser</a> | Homo sapiens ring finger protein 121 (RNF121), transcript variant 3, mRNA.                                                                                           |
| <a href="#">468</a> | <a href="#">NM_194452</a>    | <a href="#">All miRNA predictions</a> | 2.16 | <a href="#">hsa-miR-125a</a> | <a href="#">Genome browser</a> | Homo sapiens ring finger protein 121 (RNF121), transcript variant 2, mRNA.                                                                                           |
| <a href="#">469</a> | <a href="#">NM_015192</a>    | <a href="#">All miRNA predictions</a> | 2.16 | <a href="#">hsa-miR-125a</a> | <a href="#">Genome browser</a> | Homo sapiens phospholipase C, beta 1 (phosphoinositide-specific) (PLCB1), transcript variant 1, mRNA.                                                                |
| <a href="#">470</a> | <a href="#">NM_182487</a>    | <a href="#">All miRNA predictions</a> | 2.15 | <a href="#">hsa-miR-125a</a> | <a href="#">Genome browser</a> | Homo sapiens olfactomedin-like 2A (OLFML2A), mRNA.                                                                                                                   |
| <a href="#">471</a> | <a href="#">NM_004535</a>    | <a href="#">All miRNA predictions</a> | 2.14 | <a href="#">hsa-miR-125a</a> | <a href="#">Genome browser</a> | Homo sapiens myelin transcription factor 1 (MYT1), mRNA.                                                                                                             |
| <a href="#">472</a> | <a href="#">NM_001002909</a> | <a href="#">All miRNA predictions</a> | 2.14 | <a href="#">hsa-miR-125a</a> | <a href="#">Genome browser</a> | Homo sapiens KIAA0553 protein (KIAA0553), mRNA.                                                                                                                      |
| <a href="#">473</a> | <a href="#">NM_033018</a>    | <a href="#">All miRNA predictions</a> | 2.13 | <a href="#">hsa-miR-125a</a> | <a href="#">Genome browser</a> | Homo sapiens PCTAIRE protein kinase 1 (PCTK1), transcript variant 2, mRNA.                                                                                           |
| <a href="#">474</a> | <a href="#">NM_021643</a>    | <a href="#">All miRNA predictions</a> | 2.13 | <a href="#">hsa-miR-125a</a> | <a href="#">Genome browser</a> | Homo sapiens tribbles homolog 2 (Drosophila) (TRIB2), mRNA.                                                                                                          |
| <a href="#">475</a> | <a href="#">NM_006312</a>    | <a href="#">All miRNA predictions</a> | 2.13 | <a href="#">hsa-miR-125a</a> | <a href="#">Genome browser</a> | Homo sapiens nuclear receptor co-repressor 2 (NCOR2), mRNA.                                                                                                          |
| <a href="#">476</a> | <a href="#">NM_033019</a>    | <a href="#">All miRNA predictions</a> | 2.13 | <a href="#">hsa-miR-125a</a> | <a href="#">Genome browser</a> | n/a                                                                                                                                                                  |
| <a href="#">477</a> | <a href="#">NM_006201</a>    | <a href="#">All miRNA predictions</a> | 2.13 | <a href="#">hsa-miR-125a</a> | <a href="#">Genome browser</a> | Homo sapiens PCTAIRE protein kinase 1 (PCTK1), transcript variant 1, mRNA.                                                                                           |
| <a href="#">478</a> | <a href="#">NM_001224</a>    | <a href="#">All miRNA predictions</a> | 2.12 | <a href="#">hsa-miR-125a</a> | <a href="#">Genome browser</a> | Homo sapiens caspase 2, apoptosis-related cysteine protease (neural precursor cell expressed, developmentally down-regulated 2) (CASP2), transcript variant 2, mRNA. |
| <a href="#">479</a> | <a href="#">NM_003483</a>    | <a href="#">All miRNA predictions</a> | 2.09 | <a href="#">hsa-miR-125a</a> | <a href="#">Genome browser</a> | Homo sapiens high mobility group AT-hook 2 (HMGA2), mRNA.                                                                                                            |
| <a href="#">480</a> | <a href="#">NM_005465</a>    | <a href="#">All miRNA predictions</a> | 2.09 | <a href="#">hsa-miR-125a</a> | <a href="#">Genome browser</a> | Homo sapiens v-akt murine thymoma viral oncogene homolog 3 (protein kinase B, gamma) (AKT3), transcript variant 1, mRNA.                                             |
| <a href="#">481</a> | <a href="#">NM_016605</a>    | <a href="#">All miRNA predictions</a> | 2.08 | <a href="#">hsa-miR-125a</a> | <a href="#">Genome browser</a> | Homo sapiens chromosome 5 open reading frame 6 (C5orf6), mRNA.                                                                                                       |
| <a href="#">482</a> | <a href="#">NM_004386</a>    | <a href="#">All miRNA predictions</a> | 2.07 | <a href="#">hsa-miR-125a</a> | <a href="#">Genome browser</a> | Homo sapiens chondroitin sulfate proteoglycan 3 (neurocan) (CSPG3), mRNA.                                                                                            |
| <a href="#">483</a> | <a href="#">NM_021116</a>    | <a href="#">All miRNA predictions</a> | 2.07 | <a href="#">hsa-miR-125a</a> | <a href="#">Genome browser</a> | Homo sapiens adenylate cyclase 1 (brain) (ADCY1), mRNA.                                                                                                              |
| <a href="#">484</a> | <a href="#">NM_003347</a>    | <a href="#">All miRNA predictions</a> | 2.06 | <a href="#">hsa-miR-125a</a> | <a href="#">Genome browser</a> | Homo sapiens ubiquitin-conjugating enzyme E2L 3 (UBE2L3), transcript variant 1, mRNA.                                                                                |
| <a href="#">485</a> | <a href="#">NM_003489</a>    | <a href="#">All miRNA predictions</a> | 2.05 | <a href="#">hsa-miR-125a</a> | <a href="#">Genome browser</a> | Homo sapiens nuclear receptor interacting protein 1 (NRIP1), mRNA.                                                                                                   |
| <a href="#">486</a> | <a href="#">NM_004427</a>    | <a href="#">All miRNA predictions</a> | 2.03 | <a href="#">hsa-miR-125a</a> | <a href="#">Genome browser</a> | Homo sapiens polyhomeotic-like 2 (Drosophila) (PHC2), transcript variant 2, mRNA.                                                                                    |

|                     |                           |                                       |      |                              |                                |                                                                                                                                                                      |
|---------------------|---------------------------|---------------------------------------|------|------------------------------|--------------------------------|----------------------------------------------------------------------------------------------------------------------------------------------------------------------|
| <a href="#">487</a> | <a href="#">NM_198040</a> | <a href="#">All miRNA predictions</a> | 2.03 | <a href="#">hsa-miR-125a</a> | <a href="#">Genome browser</a> | Homo sapiens polyhomeotic-like 2 (Drosophila) (PHC2), transcript variant 1, mRNA.                                                                                    |
| <a href="#">488</a> | <a href="#">NM_033285</a> | <a href="#">All miRNA predictions</a> | 2.01 | <a href="#">hsa-miR-125a</a> | <a href="#">Genome browser</a> | Homo sapiens tumor protein p53 inducible nuclear protein 1 (TP53INP1), mRNA.                                                                                         |
| <a href="#">489</a> | <a href="#">NM_025054</a> | <a href="#">All miRNA predictions</a> | 2.00 | <a href="#">hsa-miR-125a</a> | <a href="#">Genome browser</a> | Homo sapiens valosin-containing protein (p97)/p47 complex-interacting protein p135 (VCIP135), mRNA.                                                                  |
| <a href="#">490</a> | <a href="#">NM_003216</a> | <a href="#">All miRNA predictions</a> | 2.00 | <a href="#">hsa-miR-125a</a> | <a href="#">Genome browser</a> | Homo sapiens thyrotrophic embryonic factor (TEF), mRNA.                                                                                                              |
| <a href="#">491</a> | <a href="#">NM_017488</a> | <a href="#">All miRNA predictions</a> | 1.99 | <a href="#">hsa-miR-125a</a> | <a href="#">Genome browser</a> | Homo sapiens adducin 2 (beta) (ADD2), transcript variant beta-4, mRNA.                                                                                               |
| <a href="#">492</a> | <a href="#">NM_177438</a> | <a href="#">All miRNA predictions</a> | 1.99 | <a href="#">hsa-miR-125a</a> | <a href="#">Genome browser</a> | Homo sapiens Dicer1, Dcr-1 homolog (Drosophila) (DICER1), transcript variant 1, mRNA.                                                                                |
| <a href="#">493</a> | <a href="#">NM_145166</a> | <a href="#">All miRNA predictions</a> | 1.99 | <a href="#">hsa-miR-125a</a> | <a href="#">Genome browser</a> | Homo sapiens hypothetical protein KIAA1190 (KIAA1190), mRNA.                                                                                                         |
| <a href="#">494</a> | <a href="#">NM_030621</a> | <a href="#">All miRNA predictions</a> | 1.99 | <a href="#">hsa-miR-125a</a> | <a href="#">Genome browser</a> | Homo sapiens Dicer1, Dcr-1 homolog (Drosophila) (DICER1), transcript variant 2, mRNA.                                                                                |
| <a href="#">495</a> | <a href="#">NM_182734</a> | <a href="#">All miRNA predictions</a> | 1.97 | <a href="#">hsa-miR-125a</a> | <a href="#">Genome browser</a> | Homo sapiens phospholipase C, beta 1 (phosphoinositide-specific) (PLCB1), transcript variant 2, mRNA.                                                                |
| <a href="#">496</a> | <a href="#">NM_198157</a> | <a href="#">All miRNA predictions</a> | 1.95 | <a href="#">hsa-miR-125a</a> | <a href="#">Genome browser</a> | Homo sapiens ubiquitin-conjugating enzyme E2L 3 (UBE2L3), transcript variant 2, mRNA.                                                                                |
| <a href="#">497</a> | <a href="#">NM_183376</a> | <a href="#">All miRNA predictions</a> | 1.94 | <a href="#">hsa-miR-125a</a> | <a href="#">Genome browser</a> | Homo sapiens arrestin domain containing 4 (ARRDC4), mRNA.                                                                                                            |
| <a href="#">498</a> | <a href="#">NM_017873</a> | <a href="#">All miRNA predictions</a> | 1.93 | <a href="#">hsa-miR-125a</a> | <a href="#">Genome browser</a> | Homo sapiens ankyrin repeat and SOCS box-containing 6 (ASB6), transcript variant 1, mRNA.                                                                            |
| <a href="#">499</a> | <a href="#">NM_206853</a> | <a href="#">All miRNA predictions</a> | 1.92 | <a href="#">hsa-miR-125a</a> | <a href="#">Genome browser</a> | Homo sapiens quaking homolog, KH domain RNA binding (mouse) (QKI), transcript variant 2, mRNA.                                                                       |
| <a href="#">500</a> | <a href="#">NM_005920</a> | <a href="#">All miRNA predictions</a> | 1.91 | <a href="#">hsa-miR-125a</a> | <a href="#">Genome browser</a> | Homo sapiens MADS box transcription enhancer factor 2, polypeptide D (myocyte enhancer factor 2D) (MEF2D), mRNA.                                                     |
| <a href="#">501</a> | <a href="#">NM_182763</a> | <a href="#">All miRNA predictions</a> | 1.90 | <a href="#">hsa-miR-125a</a> | <a href="#">Genome browser</a> | Homo sapiens myeloid cell leukemia sequence 1 (BCL2-related) (MCL1), transcript variant 2, mRNA.                                                                     |
| <a href="#">502</a> | <a href="#">NM_030627</a> | <a href="#">All miRNA predictions</a> | 1.90 | <a href="#">hsa-miR-125a</a> | <a href="#">Genome browser</a> | Homo sapiens cytoplasmic polyadenylation element binding protein 4 (CPEB4), mRNA.                                                                                    |
| <a href="#">503</a> | <a href="#">NM_021960</a> | <a href="#">All miRNA predictions</a> | 1.90 | <a href="#">hsa-miR-125a</a> | <a href="#">Genome browser</a> | Homo sapiens myeloid cell leukemia sequence 1 (BCL2-related) (MCL1), transcript variant 1, mRNA.                                                                     |
| <a href="#">504</a> | <a href="#">NM_002840</a> | <a href="#">All miRNA predictions</a> | 1.89 | <a href="#">hsa-miR-125a</a> | <a href="#">Genome browser</a> | Homo sapiens protein tyrosine phosphatase, receptor type, F (PTPRF), transcript variant 1, mRNA.                                                                     |
| <a href="#">505</a> | <a href="#">NM_130440</a> | <a href="#">All miRNA predictions</a> | 1.89 | <a href="#">hsa-miR-125a</a> | <a href="#">Genome browser</a> | Homo sapiens protein tyrosine phosphatase, receptor type, F (PTPRF), transcript variant 2, mRNA.                                                                     |
| <a href="#">506</a> | <a href="#">NM_032984</a> | <a href="#">All miRNA predictions</a> | 1.88 | <a href="#">hsa-miR-125a</a> | <a href="#">Genome browser</a> | Homo sapiens caspase 2, apoptosis-related cysteine protease (neural precursor cell expressed, developmentally down-regulated 2) (CASP2), transcript variant 4, mRNA. |
| <a href="#">507</a> | <a href="#">NM_032983</a> | <a href="#">All miRNA predictions</a> | 1.88 | <a href="#">hsa-miR-125a</a> | <a href="#">Genome browser</a> | Homo sapiens caspase 2, apoptosis-related cysteine protease (neural precursor cell expressed, developmentally down-regulated 2) (CASP2), transcript variant 3, mRNA. |
| <a href="#">508</a> | <a href="#">NM_005197</a> | <a href="#">All miRNA predictions</a> | 1.85 | <a href="#">hsa-miR-125a</a> | <a href="#">Genome browser</a> | Homo sapiens checkpoint suppressor 1 (CHES1), mRNA.                                                                                                                  |
| <a href="#">509</a> | <a href="#">NM_138473</a> | <a href="#">All miRNA predictions</a> | 1.84 | <a href="#">hsa-miR-125a</a> | <a href="#">Genome browser</a> | Homo sapiens Sp1 transcription factor (SP1), mRNA.                                                                                                                   |
| <a href="#">510</a> | <a href="#">NM_019084</a> | <a href="#">All miRNA predictions</a> | 1.83 | <a href="#">hsa-miR-125a</a> | <a href="#">Genome browser</a> | Homo sapiens cyclin J (CCNJ), mRNA.                                                                                                                                  |
| <a href="#">511</a> | <a href="#">NM_013449</a> | <a href="#">All miRNA predictions</a> | 1.83 | <a href="#">hsa-miR-125a</a> | <a href="#">Genome browser</a> | Homo sapiens bromodomain adjacent to zinc finger domain, 2A (BAZ2A), mRNA.                                                                                           |
| <a href="#">512</a> | <a href="#">NM_001438</a> | <a href="#">All miRNA predictions</a> | 1.83 | <a href="#">hsa-miR-125a</a> | <a href="#">Genome browser</a> | Homo sapiens estrogen-related receptor gamma (ESRRG), transcript variant 1, mRNA.                                                                                    |
| <a href="#">513</a> | <a href="#">NM_206595</a> | <a href="#">All miRNA predictions</a> | 1.83 | <a href="#">hsa-miR-125a</a> | <a href="#">Genome browser</a> | Homo sapiens estrogen-related receptor gamma (ESRRG), transcript variant 3, mRNA.                                                                                    |
| <a href="#">514</a> | <a href="#">NM_206594</a> | <a href="#">All miRNA predictions</a> | 1.83 | <a href="#">hsa-miR-125a</a> | <a href="#">Genome browser</a> | Homo sapiens estrogen-related receptor gamma (ESRRG), transcript variant 2, mRNA.                                                                                    |
| <a href="#">515</a> | <a href="#">NM_003045</a> | <a href="#">All miRNA predictions</a> | 1.82 | <a href="#">hsa-miR-125a</a> | <a href="#">Genome browser</a> | Homo sapiens solute carrier family 7 (cationic amino acid transporter, y+ system), member 1 (SLC7A1), mRNA.                                                          |
| <a href="#">516</a> | <a href="#">NM_015278</a> | <a href="#">All miRNA</a>             | 1.81 | <a href="#">hsa-miR-</a>     | <a href="#">Genome</a>         | Homo sapiens SAM and SH3 domain containing 1                                                                                                                         |

|                     |                           | <a href="#">predictions</a>           |      | <a href="#">125a</a>         | <a href="#">browser</a>        | (SASH1), mRNA.                                                                                             |
|---------------------|---------------------------|---------------------------------------|------|------------------------------|--------------------------------|------------------------------------------------------------------------------------------------------------|
| <a href="#">517</a> | <a href="#">NM_030915</a> | <a href="#">All miRNA predictions</a> | 1.80 | <a href="#">hsa-miR-125a</a> | <a href="#">Genome browser</a> | Homo sapiens likely ortholog of mouse limb-bud and heart gene (LBH), mRNA.                                 |
| <a href="#">518</a> | <a href="#">NM_005475</a> | <a href="#">All miRNA predictions</a> | 1.76 | <a href="#">hsa-miR-125a</a> | <a href="#">Genome browser</a> | Homo sapiens lymphocyte adaptor protein (LNK), mRNA.                                                       |
| <a href="#">519</a> | <a href="#">NM_004393</a> | <a href="#">All miRNA predictions</a> | 1.74 | <a href="#">hsa-miR-125a</a> | <a href="#">Genome browser</a> | Homo sapiens dystroglycan 1 (dystrophin-associated glycoprotein 1) (DAG1), mRNA.                           |
| <a href="#">520</a> | <a href="#">NM_005668</a> | <a href="#">All miRNA predictions</a> | 1.73 | <a href="#">hsa-miR-125a</a> | <a href="#">Genome browser</a> | Homo sapiens sialyltransferase 8D (alpha-2, 8-polysialyltransferase) (SIAT8D), transcript variant 1, mRNA. |
| <a href="#">521</a> | <a href="#">NM_177999</a> | <a href="#">All miRNA predictions</a> | 1.69 | <a href="#">hsa-miR-125a</a> | <a href="#">Genome browser</a> | Homo sapiens ankyrin repeat and SOCS box-containing 6 (ASB6), transcript variant 2, mRNA.                  |
| <a href="#">522</a> | <a href="#">NM_133333</a> | <a href="#">All miRNA predictions</a> | 1.67 | <a href="#">hsa-miR-125a</a> | <a href="#">Genome browser</a> | Homo sapiens Wolf-Hirschhorn syndrome candidate 1 (WHSC1), transcript variant 6, mRNA.                     |
| <a href="#">523</a> | <a href="#">NM_000430</a> | <a href="#">All miRNA predictions</a> | 1.67 | <a href="#">hsa-miR-125a</a> | <a href="#">Genome browser</a> | Homo sapiens platelet-activating factor acetylhydrolase, isoform Ib, alpha subunit 45kDa (PAFAH1B1), mRNA. |
| <a href="#">524</a> | <a href="#">NM_133332</a> | <a href="#">All miRNA predictions</a> | 1.66 | <a href="#">hsa-miR-125a</a> | <a href="#">Genome browser</a> | Homo sapiens Wolf-Hirschhorn syndrome candidate 1 (WHSC1), transcript variant 5, mRNA.                     |
| <a href="#">525</a> | <a href="#">NM_206854</a> | <a href="#">All miRNA predictions</a> | 1.64 | <a href="#">hsa-miR-125a</a> | <a href="#">Genome browser</a> | Homo sapiens quaking homolog, KH domain RNA binding (mouse) (QKI), transcript variant 3, mRNA.             |
| <a href="#">526</a> | <a href="#">NM_021255</a> | <a href="#">All miRNA predictions</a> | 1.64 | <a href="#">hsa-miR-125a</a> | <a href="#">Genome browser</a> | Homo sapiens pellino homolog 2 (Drosophila) (PELI2), mRNA.                                                 |
| <a href="#">527</a> | <a href="#">NM_014746</a> | <a href="#">All miRNA predictions</a> | 1.40 | <a href="#">hsa-miR-125a</a> | <a href="#">Genome browser</a> | Homo sapiens ring finger protein 144 (RNF144), mRNA.                                                       |
| <a href="#">528</a> | <a href="#">NM_005065</a> | <a href="#">All miRNA predictions</a> | 1.39 | <a href="#">hsa-miR-125a</a> | <a href="#">Genome browser</a> | Homo sapiens sel-1 suppressor of lin-12-like (C. elegans) (SEL1L), mRNA.                                   |
| <a href="#">529</a> | <a href="#">NM_194278</a> | <a href="#">All miRNA predictions</a> | 1.32 | <a href="#">hsa-miR-125a</a> | <a href="#">Genome browser</a> | Homo sapiens chromosome 14 open reading frame 43 (C14orf43), mRNA.                                         |
| <a href="#">530</a> | <a href="#">NM_000793</a> | <a href="#">All miRNA predictions</a> | 1.19 | <a href="#">hsa-miR-125a</a> | <a href="#">Genome browser</a> | Homo sapiens deiodinase, iodothyronine, type II (DIO2), transcript variant 2, mRNA.                        |
| <a href="#">531</a> | <a href="#">NM_013989</a> | <a href="#">All miRNA predictions</a> | 1.19 | <a href="#">hsa-miR-125a</a> | <a href="#">Genome browser</a> | Homo sapiens deiodinase, iodothyronine, type II (DIO2), transcript variant 1, mRNA.                        |
